# Supplementary material for: Marinopyrrole Derivatives as Potential Antibiotic Agents against Methicillin-Resistant Staphylococcus aureus (II)
Source: PubMed Central journal article supplement (PMC3766874; doi:10.3390/md11082927), 2013-08-15
Supplement: marinedrugs-11-02927-s001.pdf [file marinedrugs-11-02927-s001.pdf]

# Supplementary Information

Figure S1.  $^1\text{H}$  NMR spectrum of 7.

CCW090729 H1 CDC13 2009-7-29  
Pulse Sequence: s2pu1

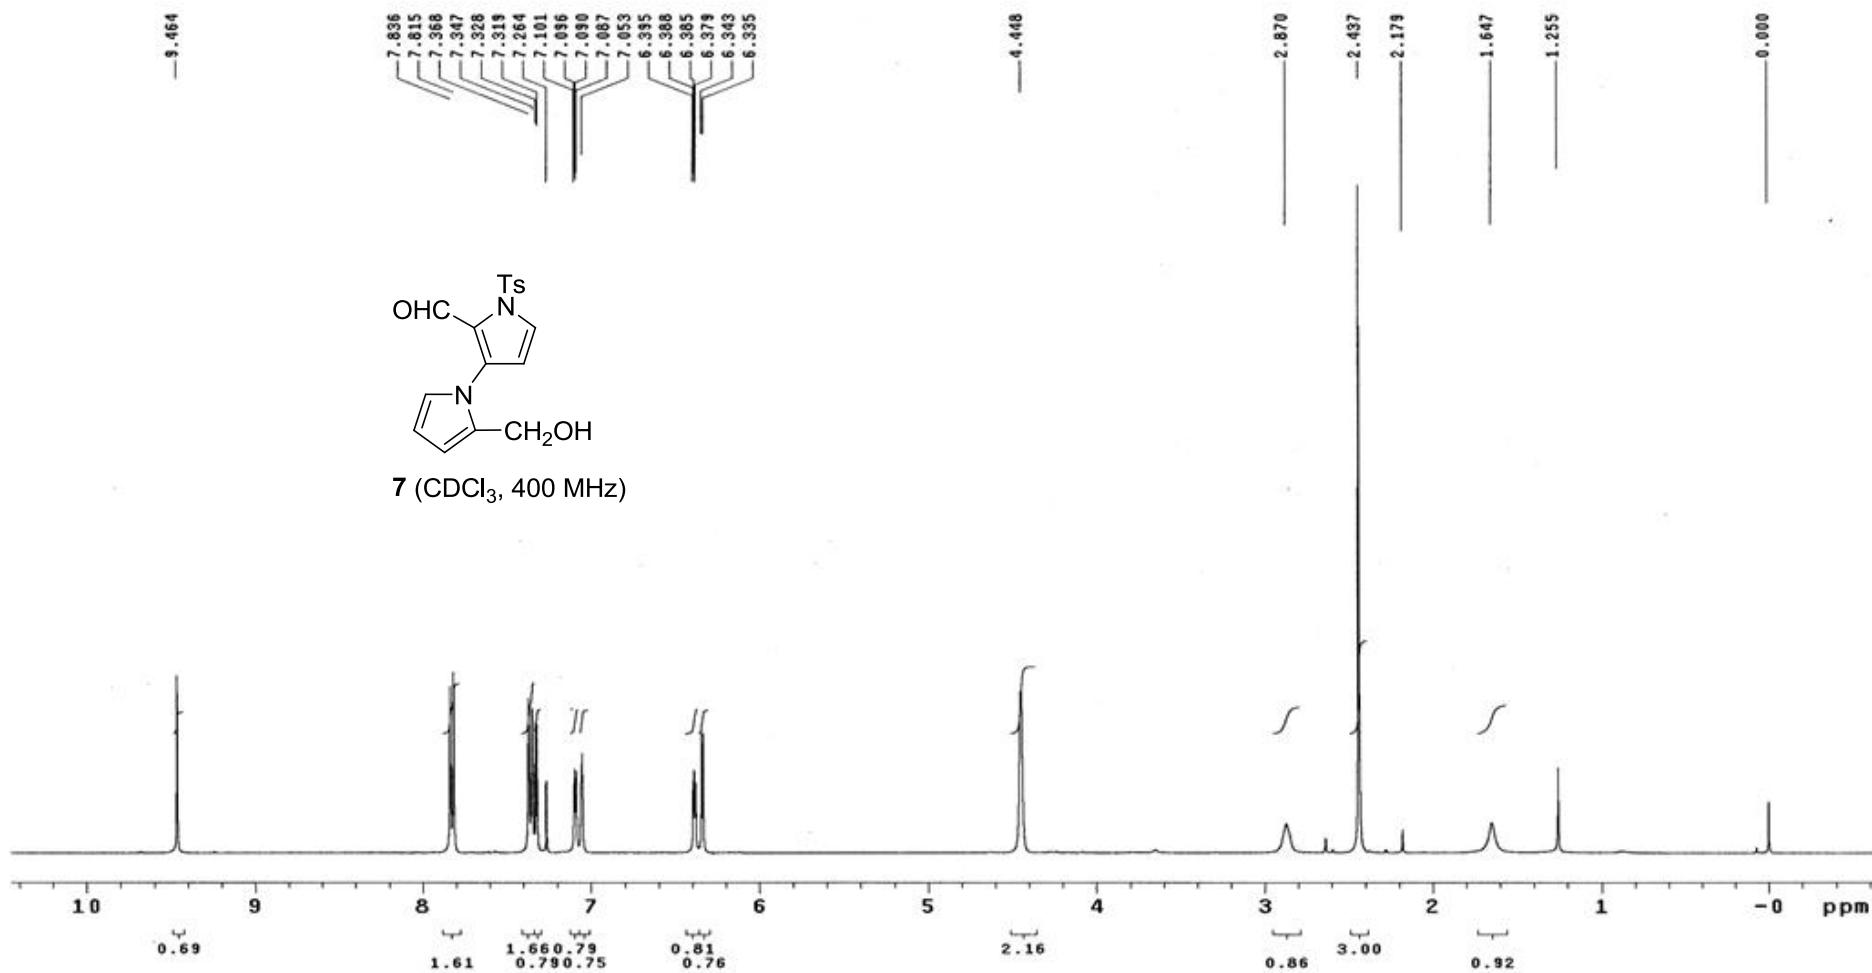

Figure S2.  $^{13}\text{C}$  NMR spectrum of 7.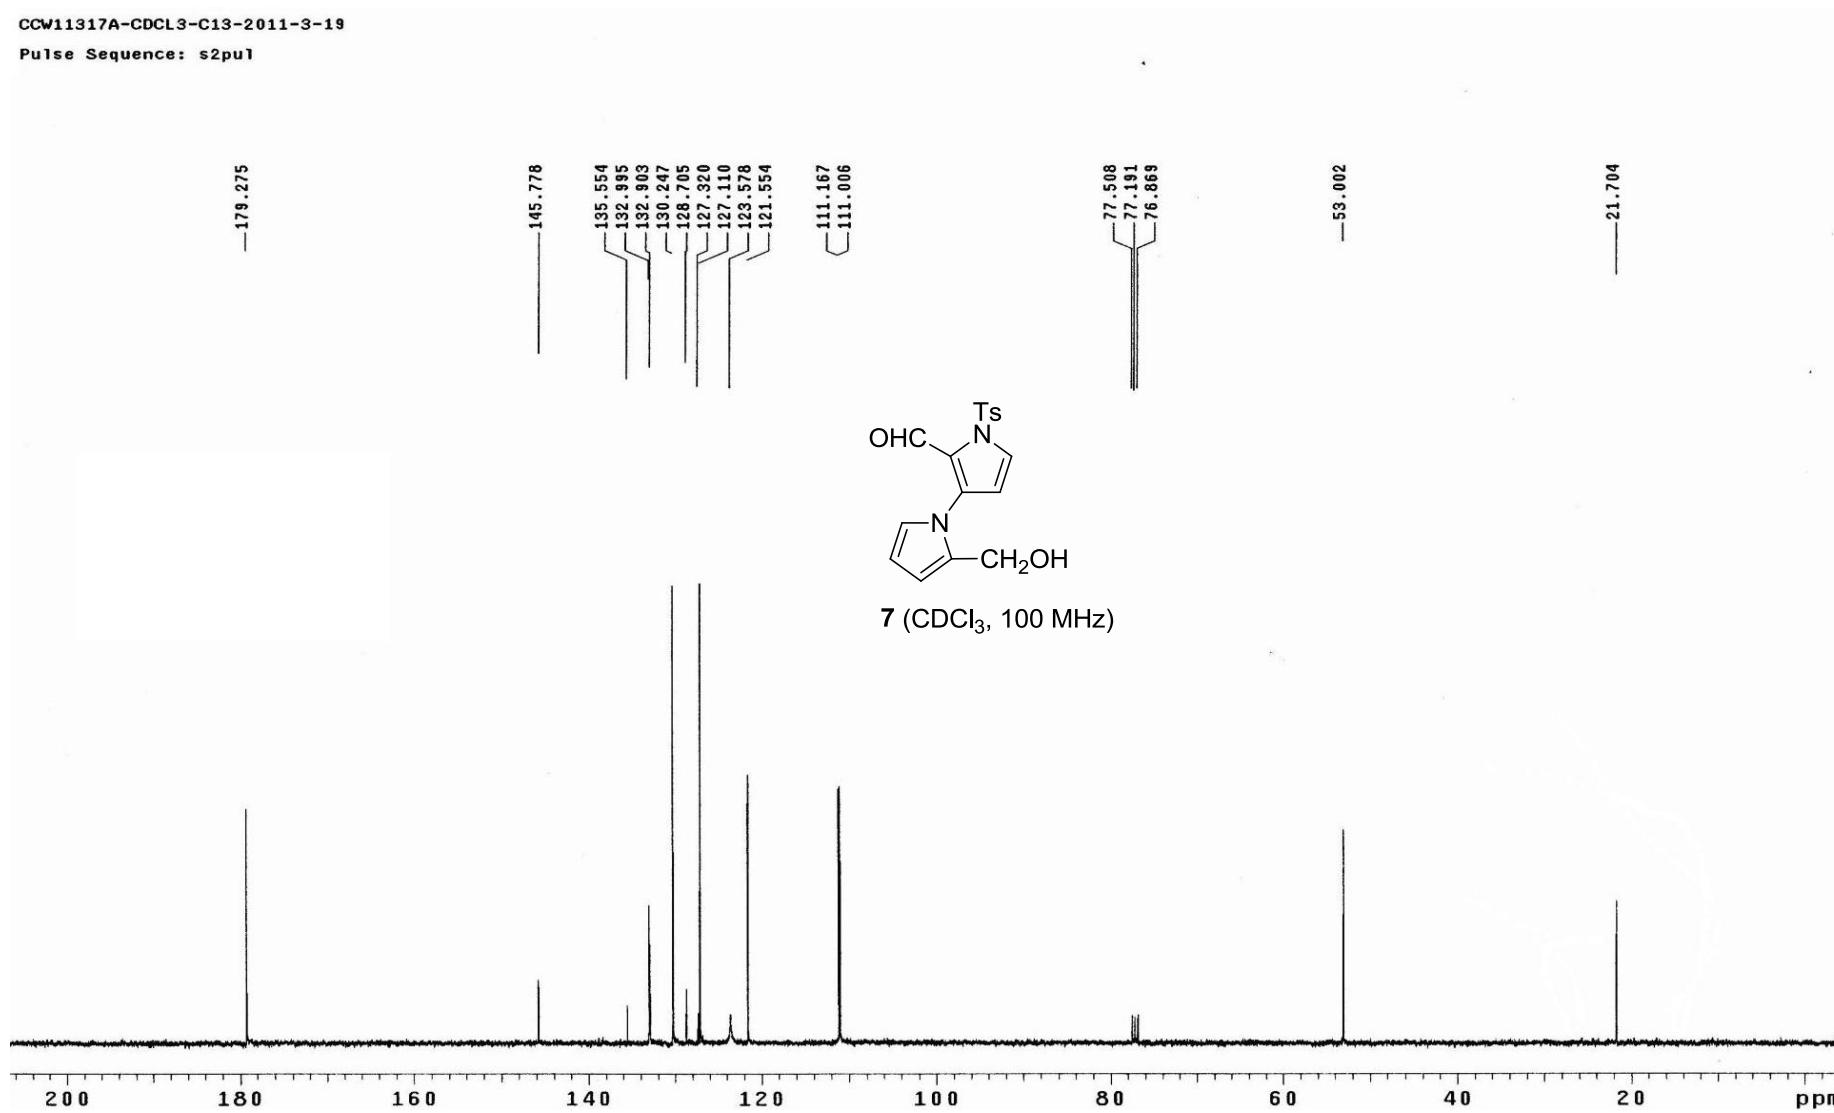

Figure S3.  $^1\text{H}$  NMR spectrum of **8**.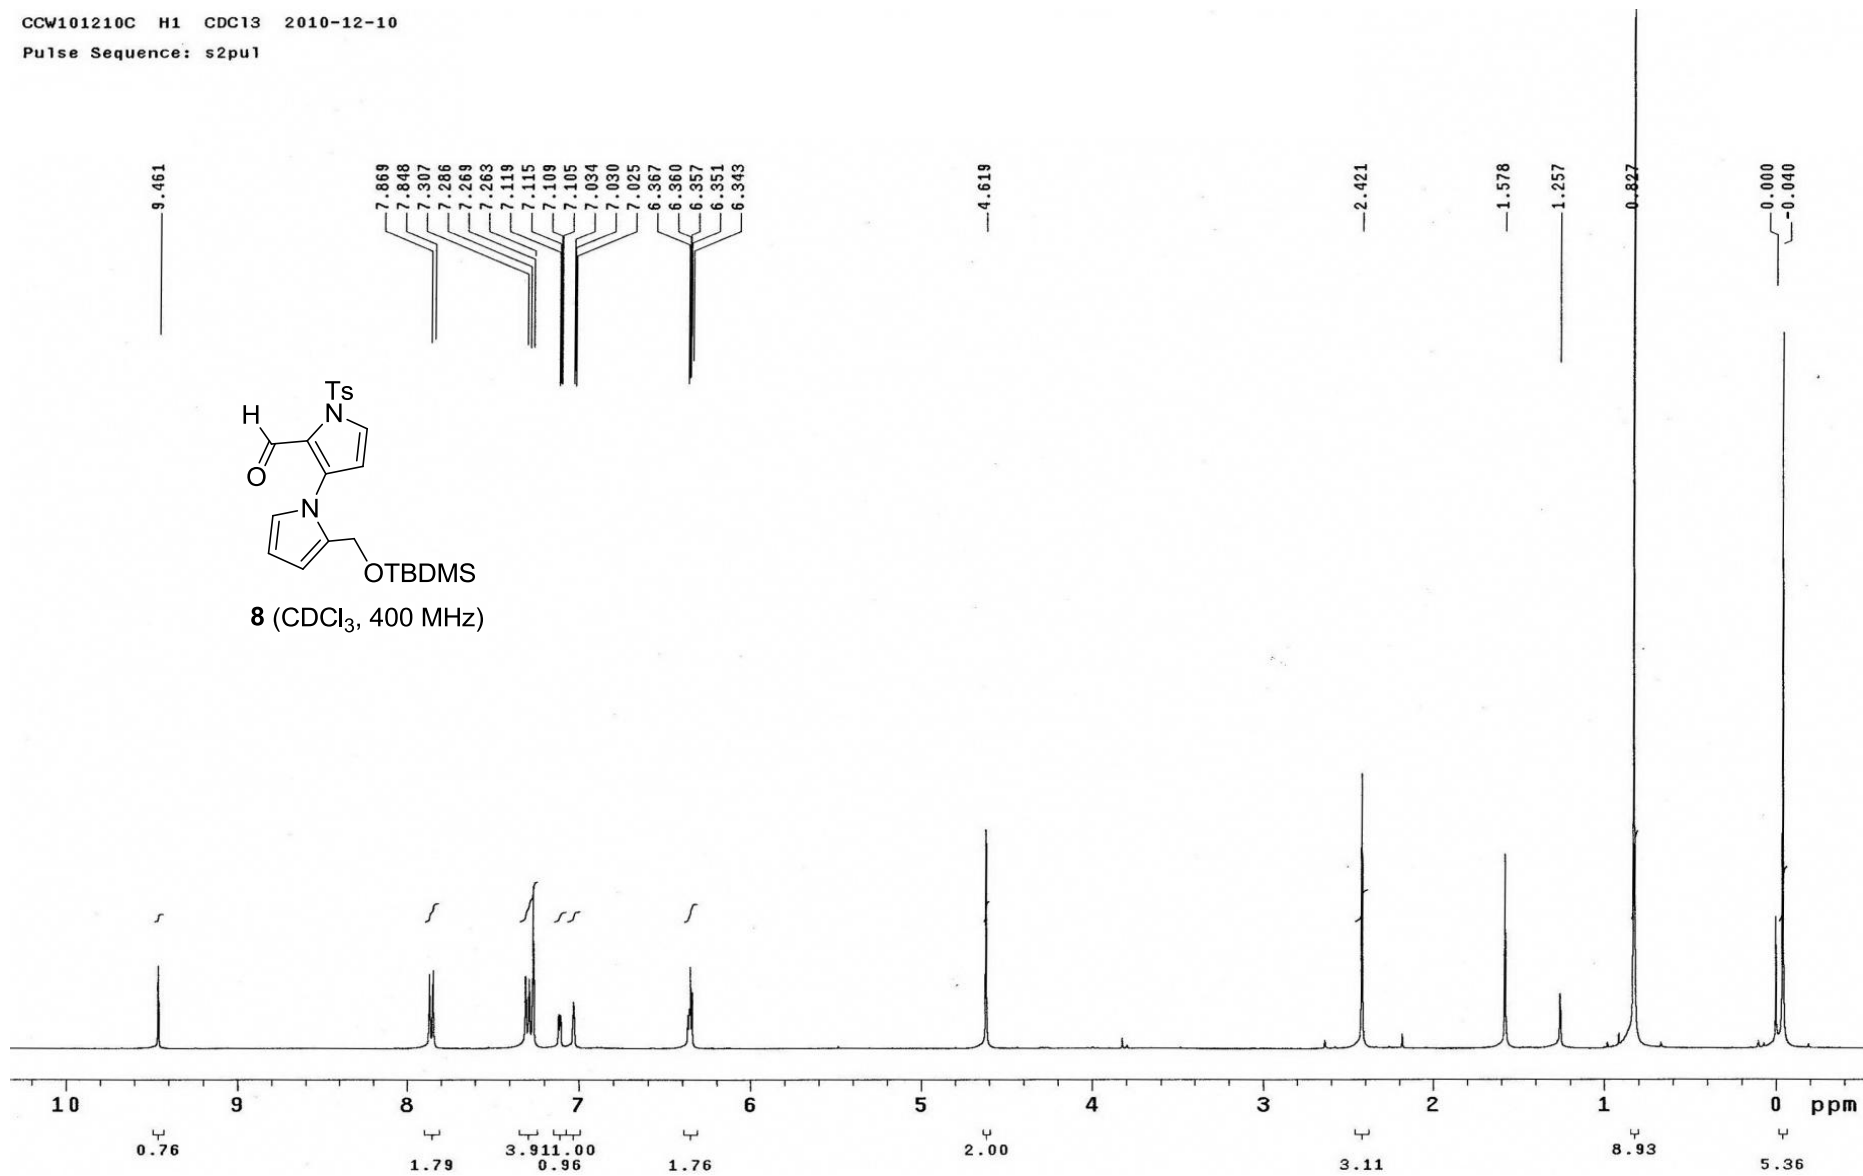

Figure S4.  $^{13}\text{C}$  NMR spectrum of **8**.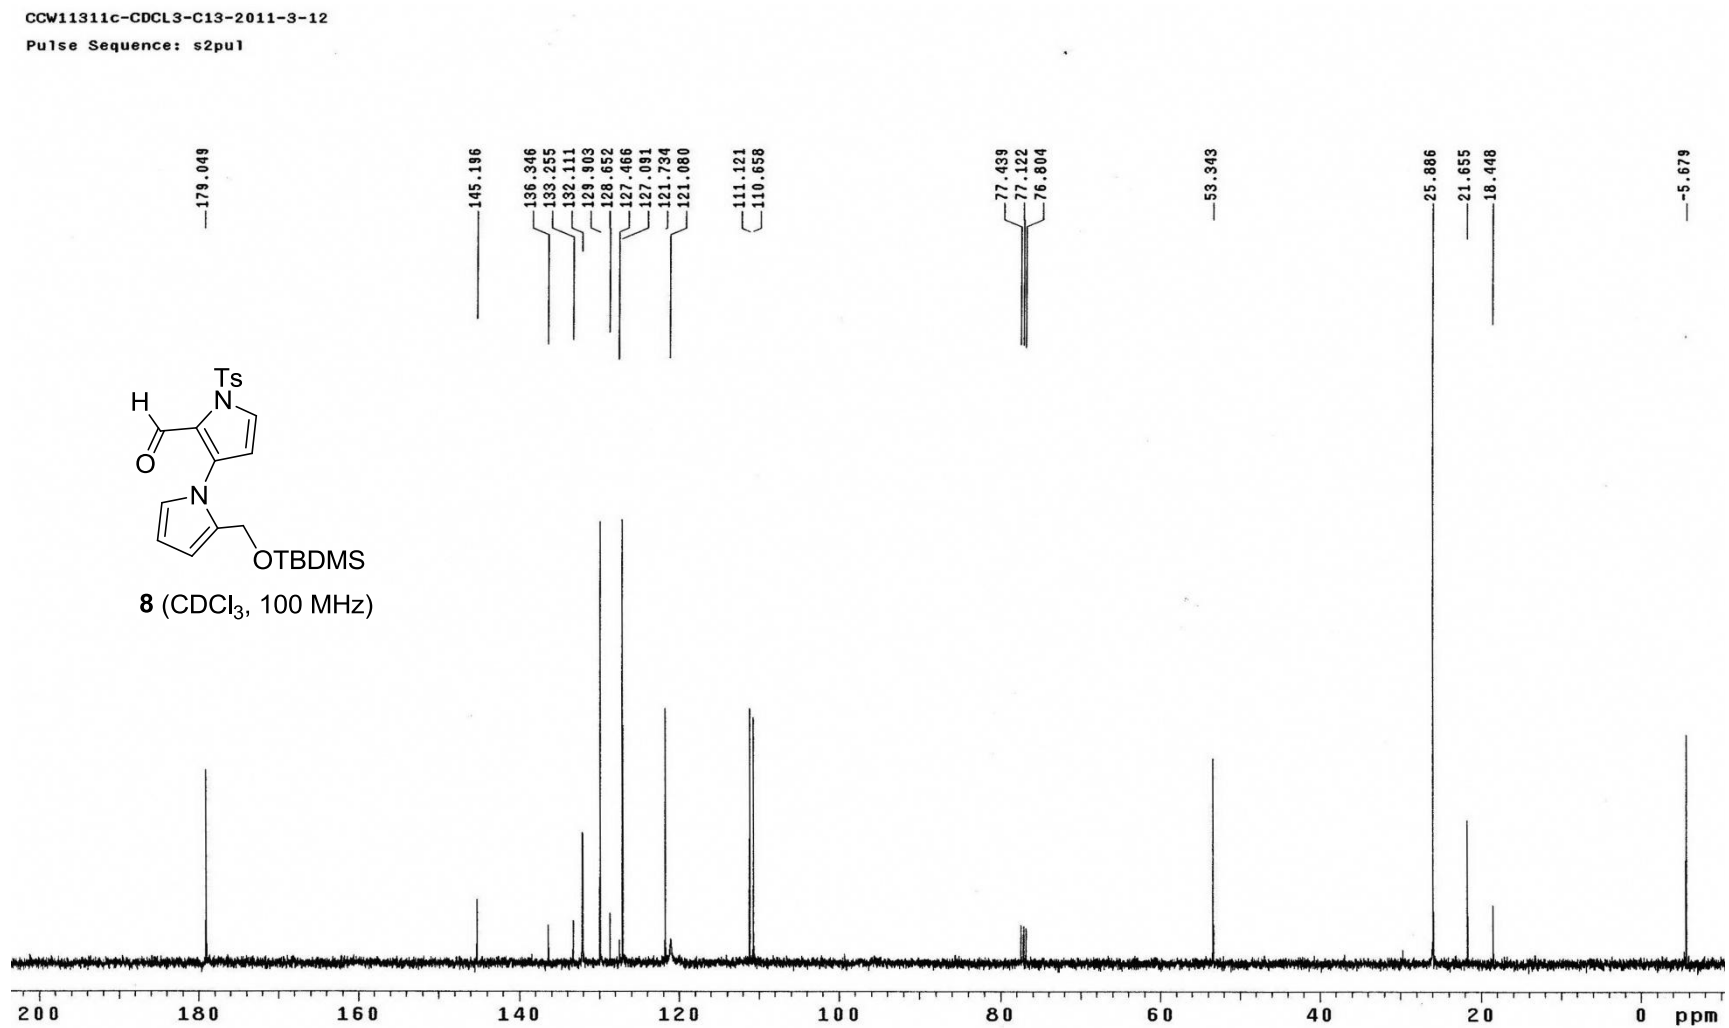

Figure S5.  $^1\text{H}$  NMR spectrum of 10.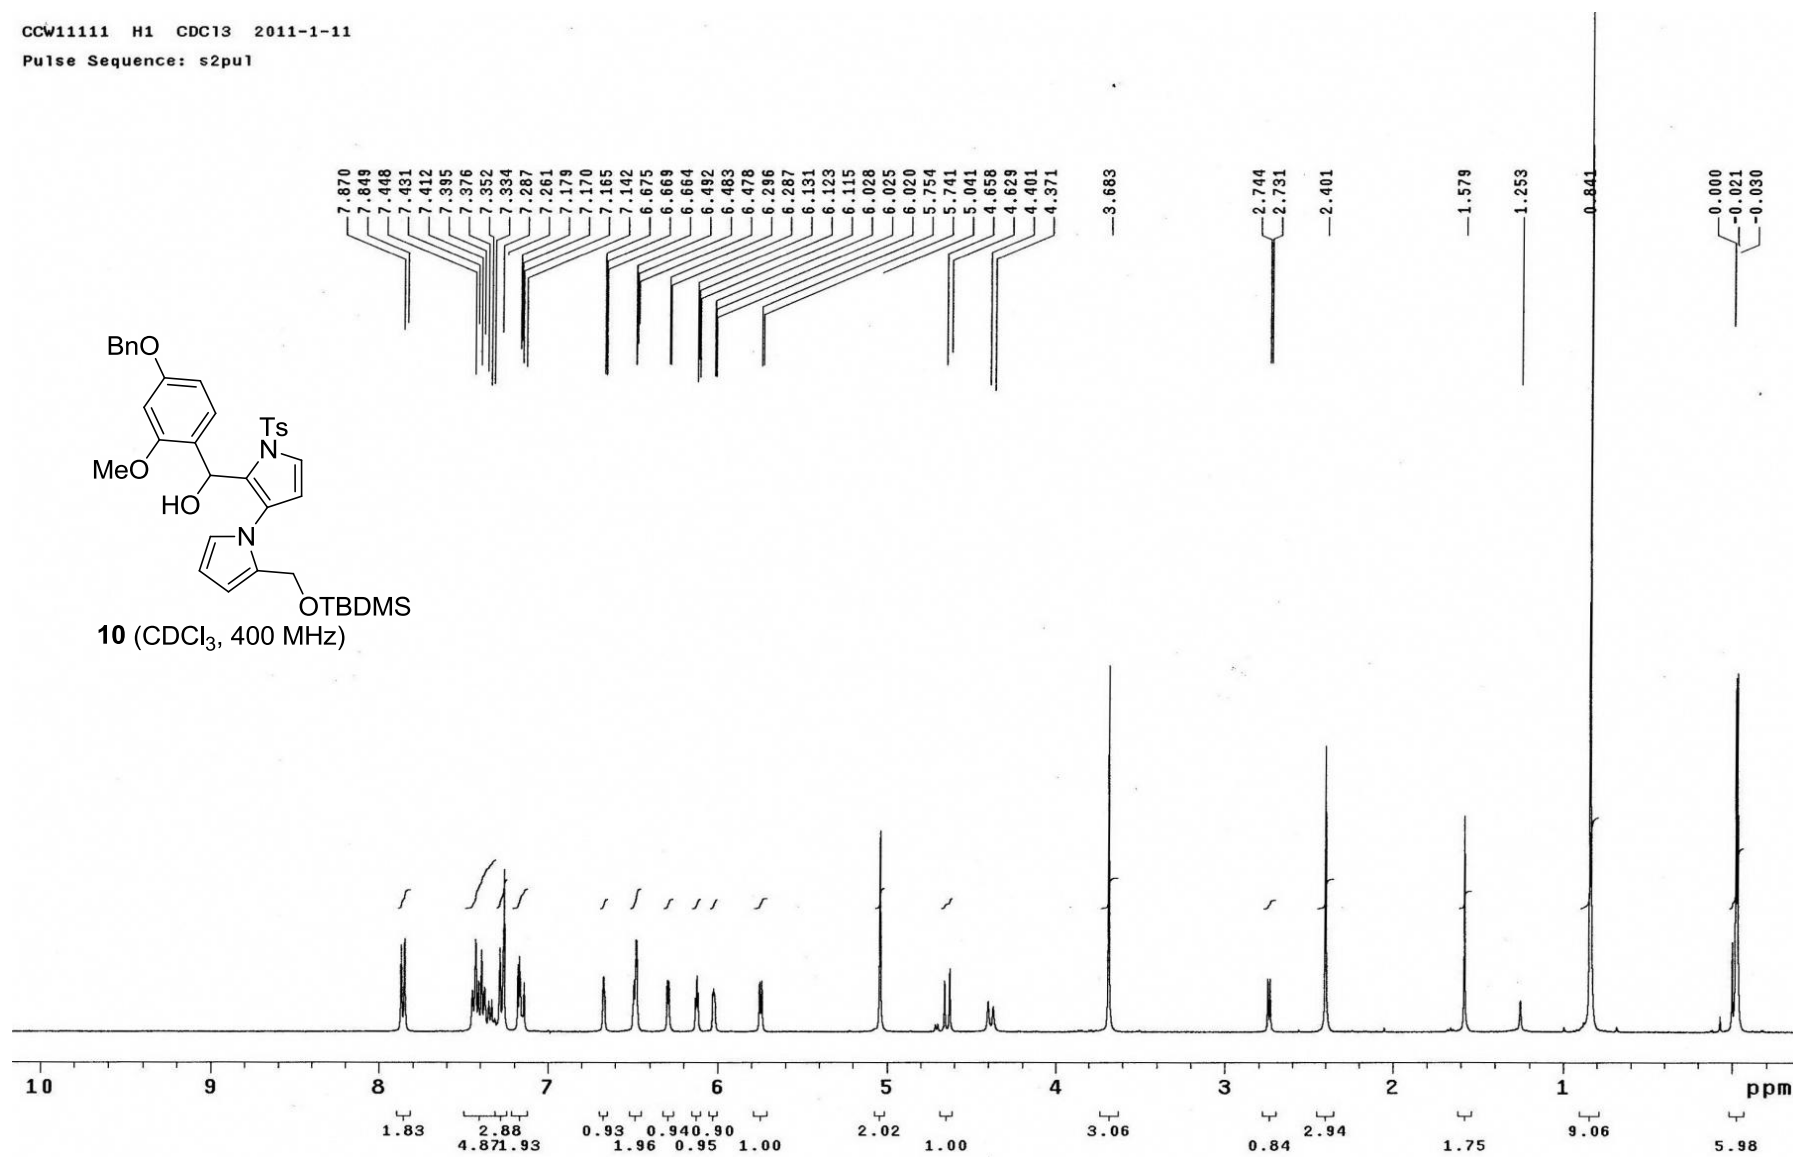

Figure S6.  $^{13}\text{C}$  NMR spectrum of 10.

CCW11311d-CDCL3-C13-2011-3-12

Pulse Sequence: s2pu1

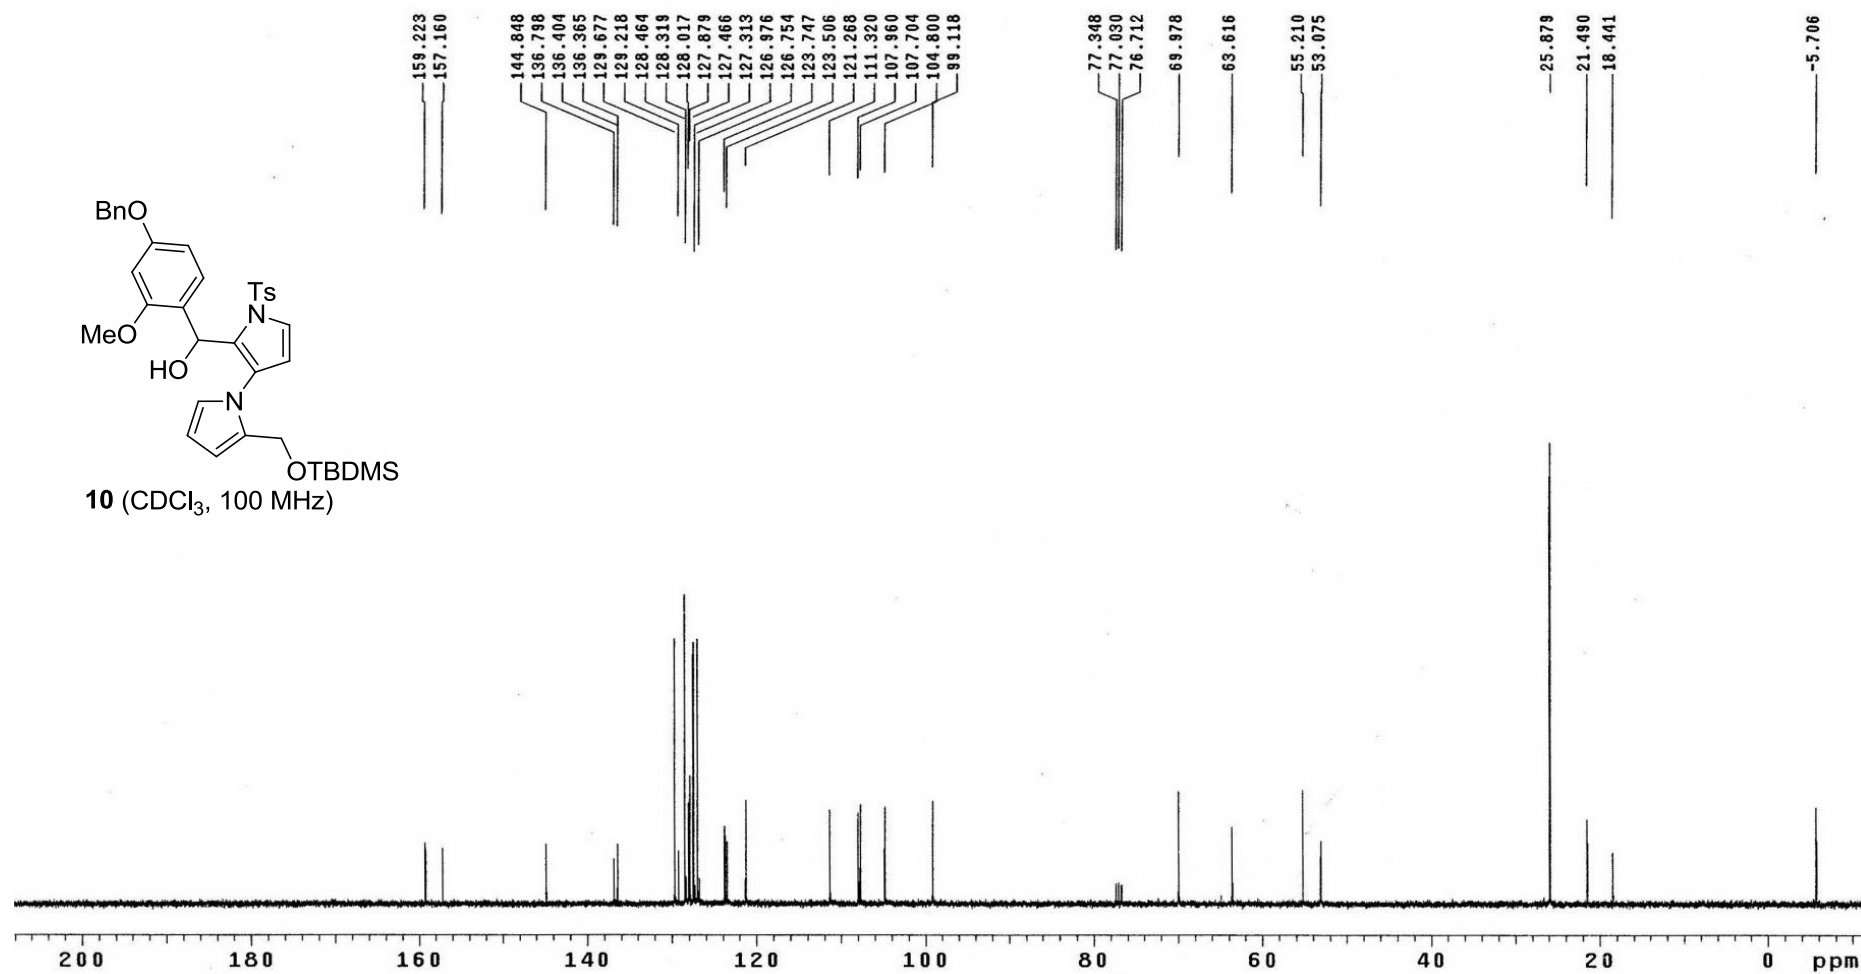

Figure S7.  $^1\text{H}$  NMR spectrum of 11.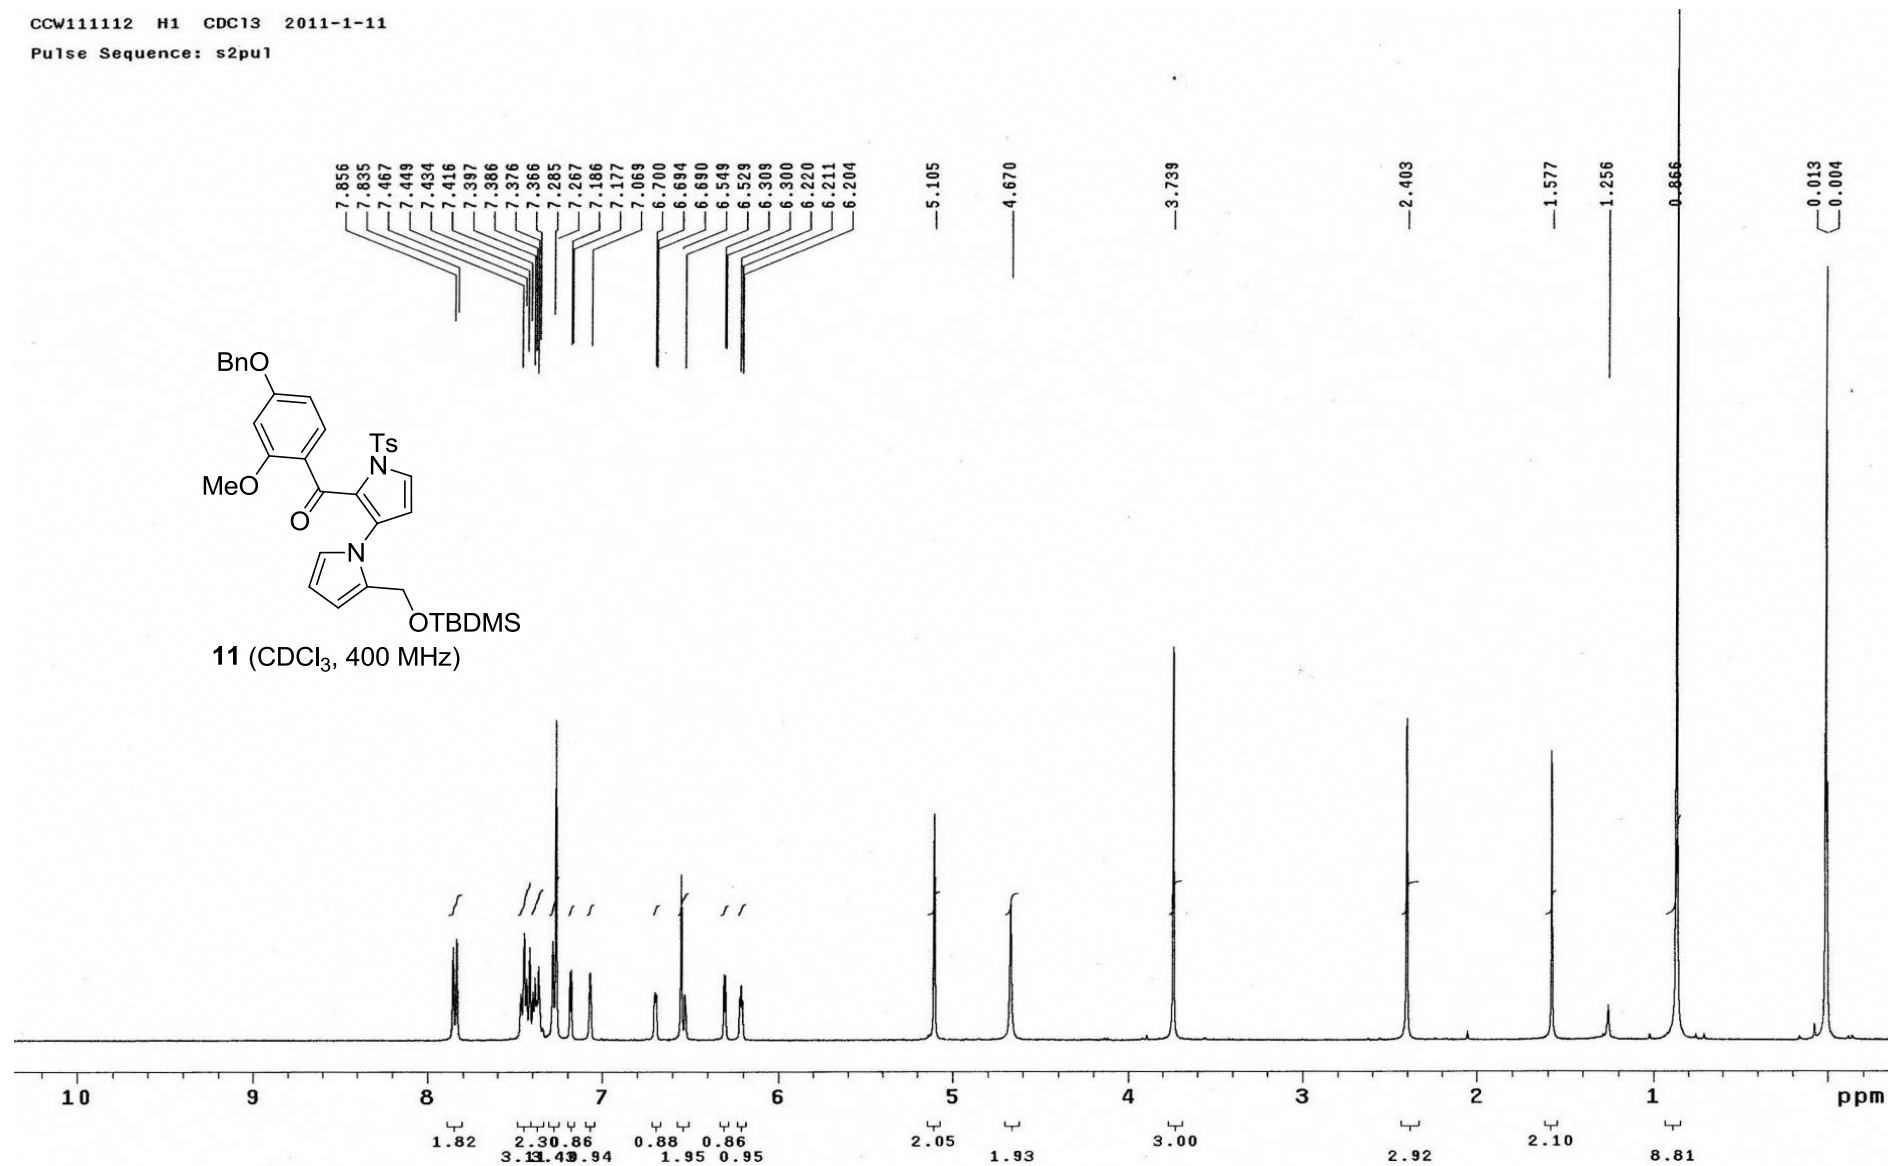

Figure S8.  $^{13}\text{C}$  NMR spectrum of 11.

CCW113111-CDCL3-C13-2011-3-12

Pulse Sequence: s2pu1

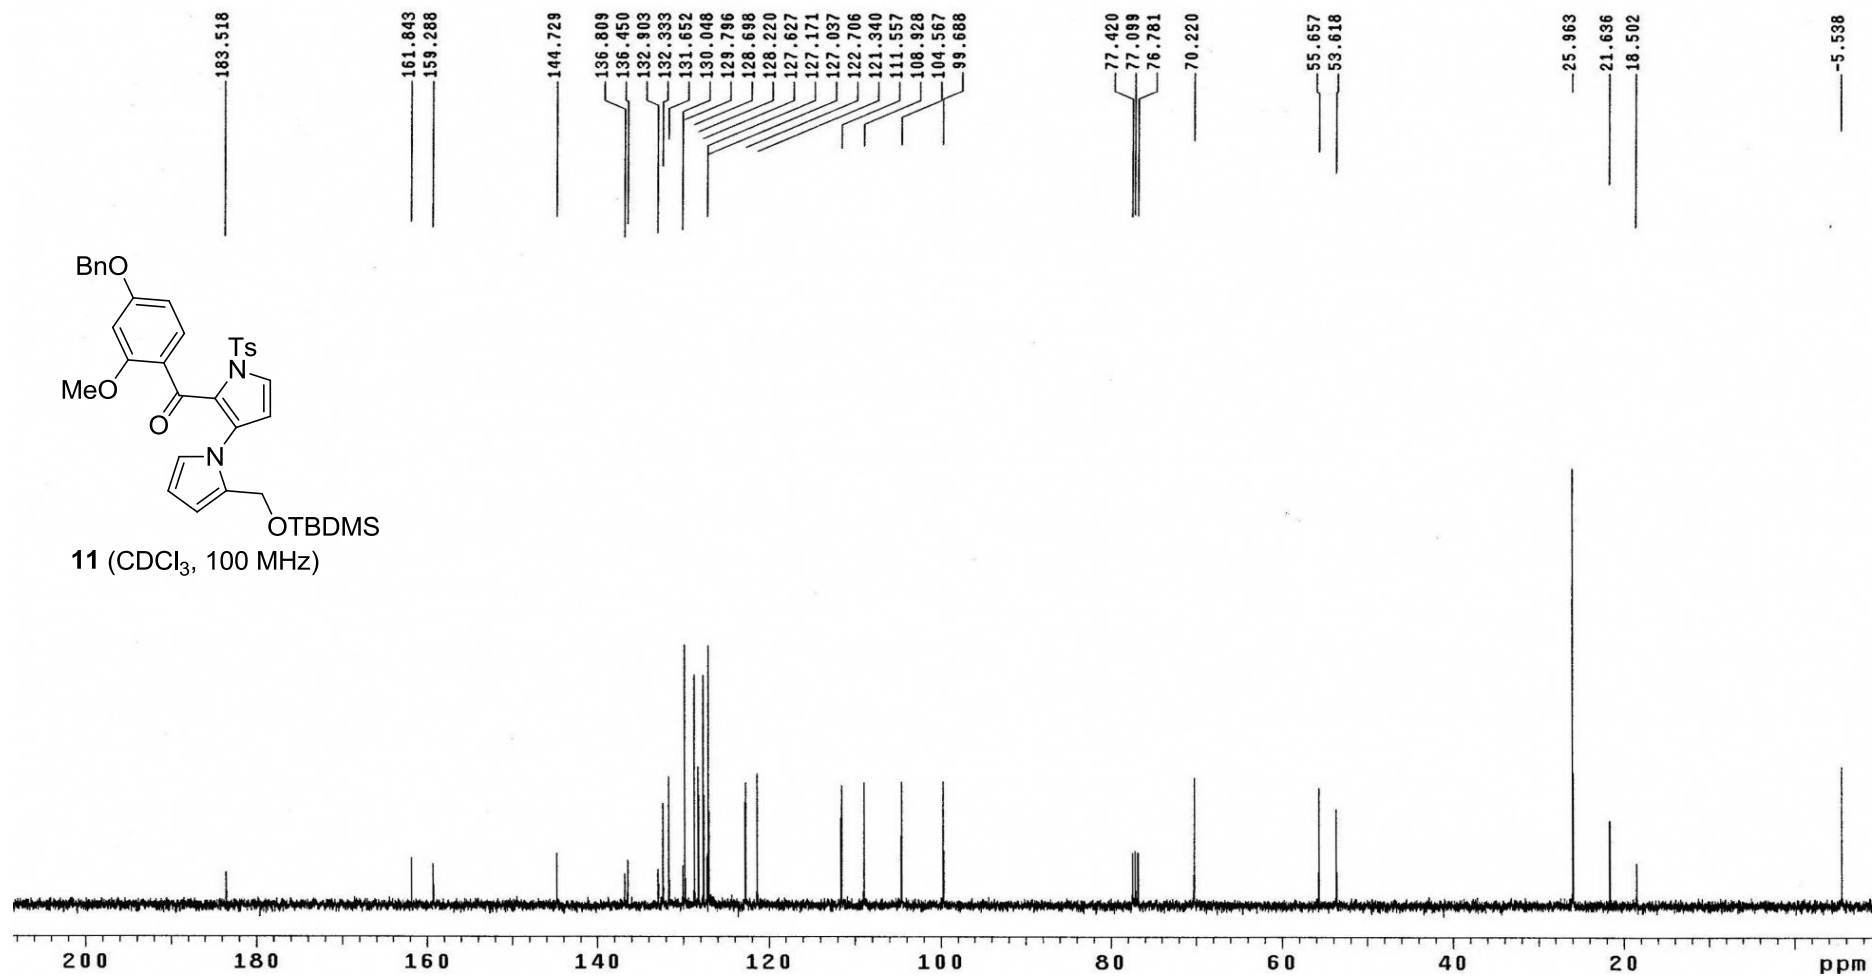



Figure S9.  $^1\text{H}$  NMR spectrum of 12.

CCW110504B H1 CDC13 2011-5-4  
Pulse Sequence: s2pu1

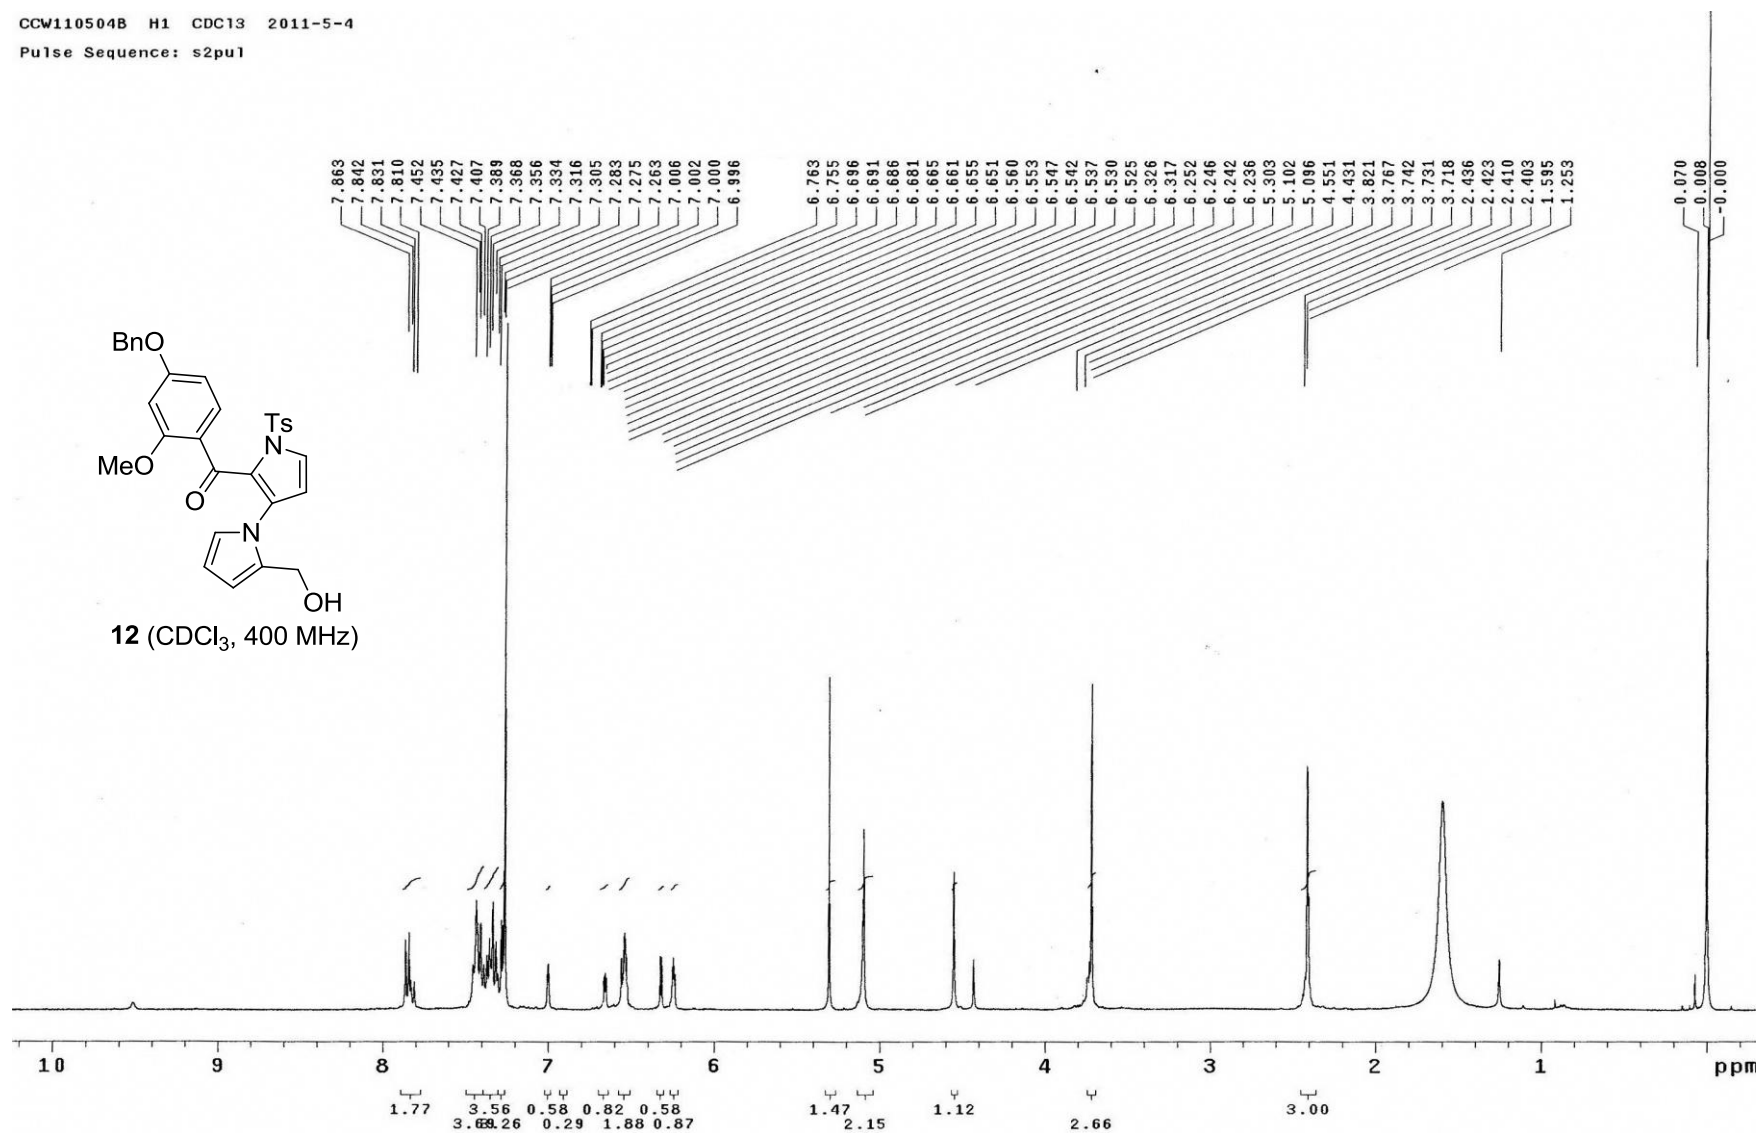

Figure S10.  $^{13}\text{C}$  NMR spectrum of 12.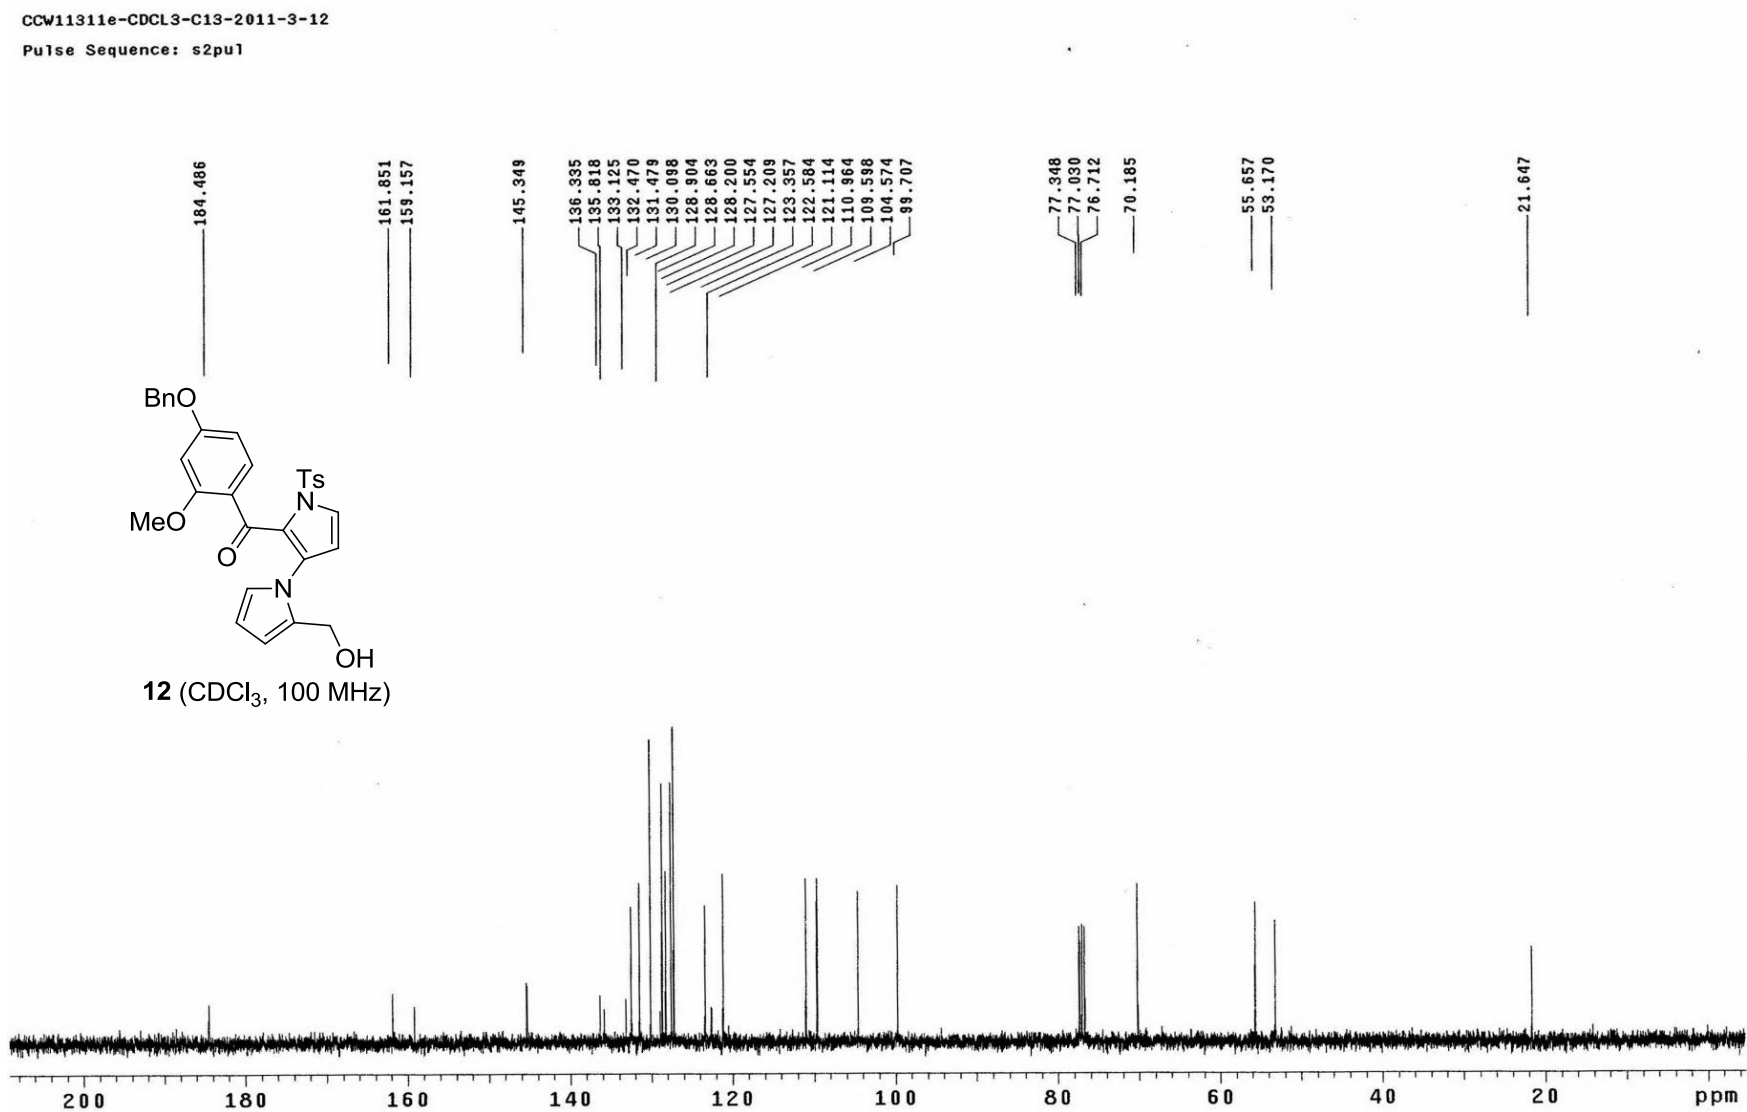

Figure S11.  $^1\text{H}$  NMR spectrum of 13.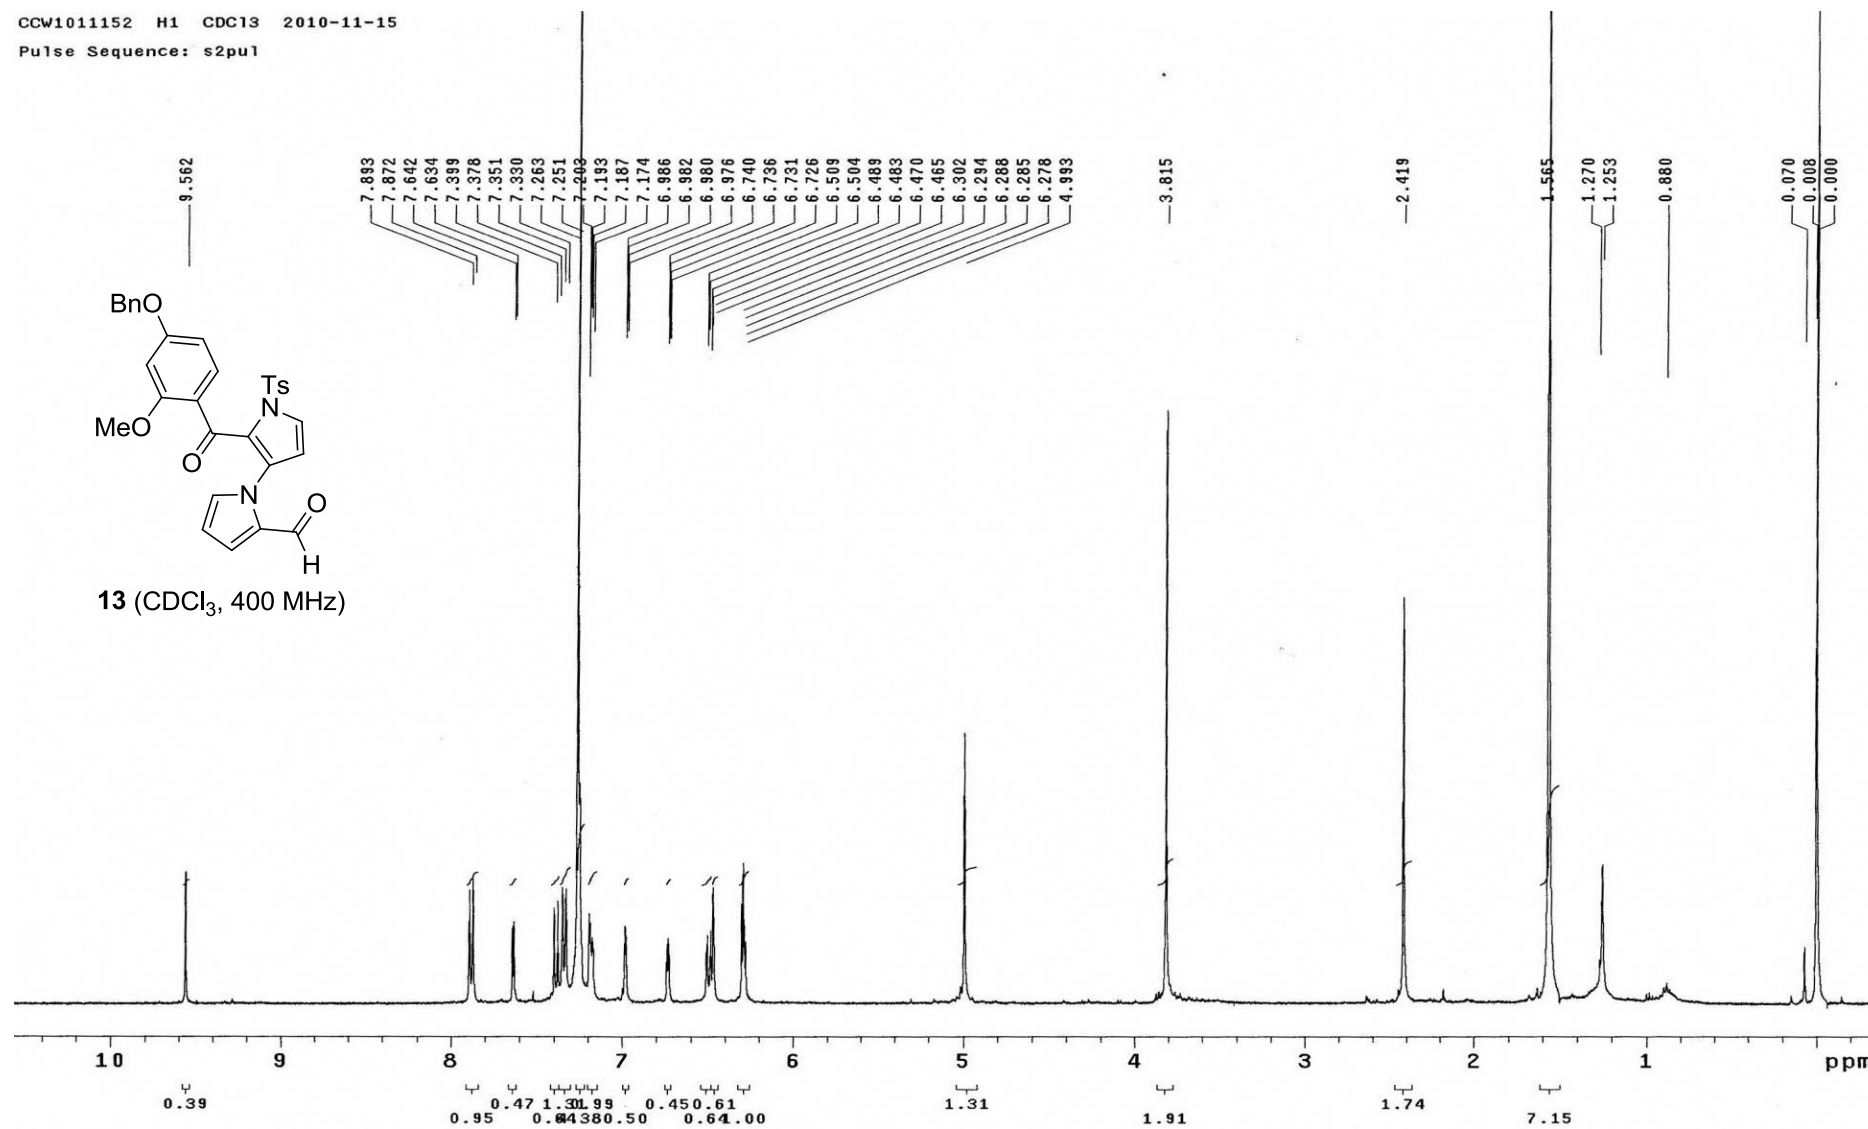

Figure S12.  $^{13}\text{C}$  NMR spectrum of 13.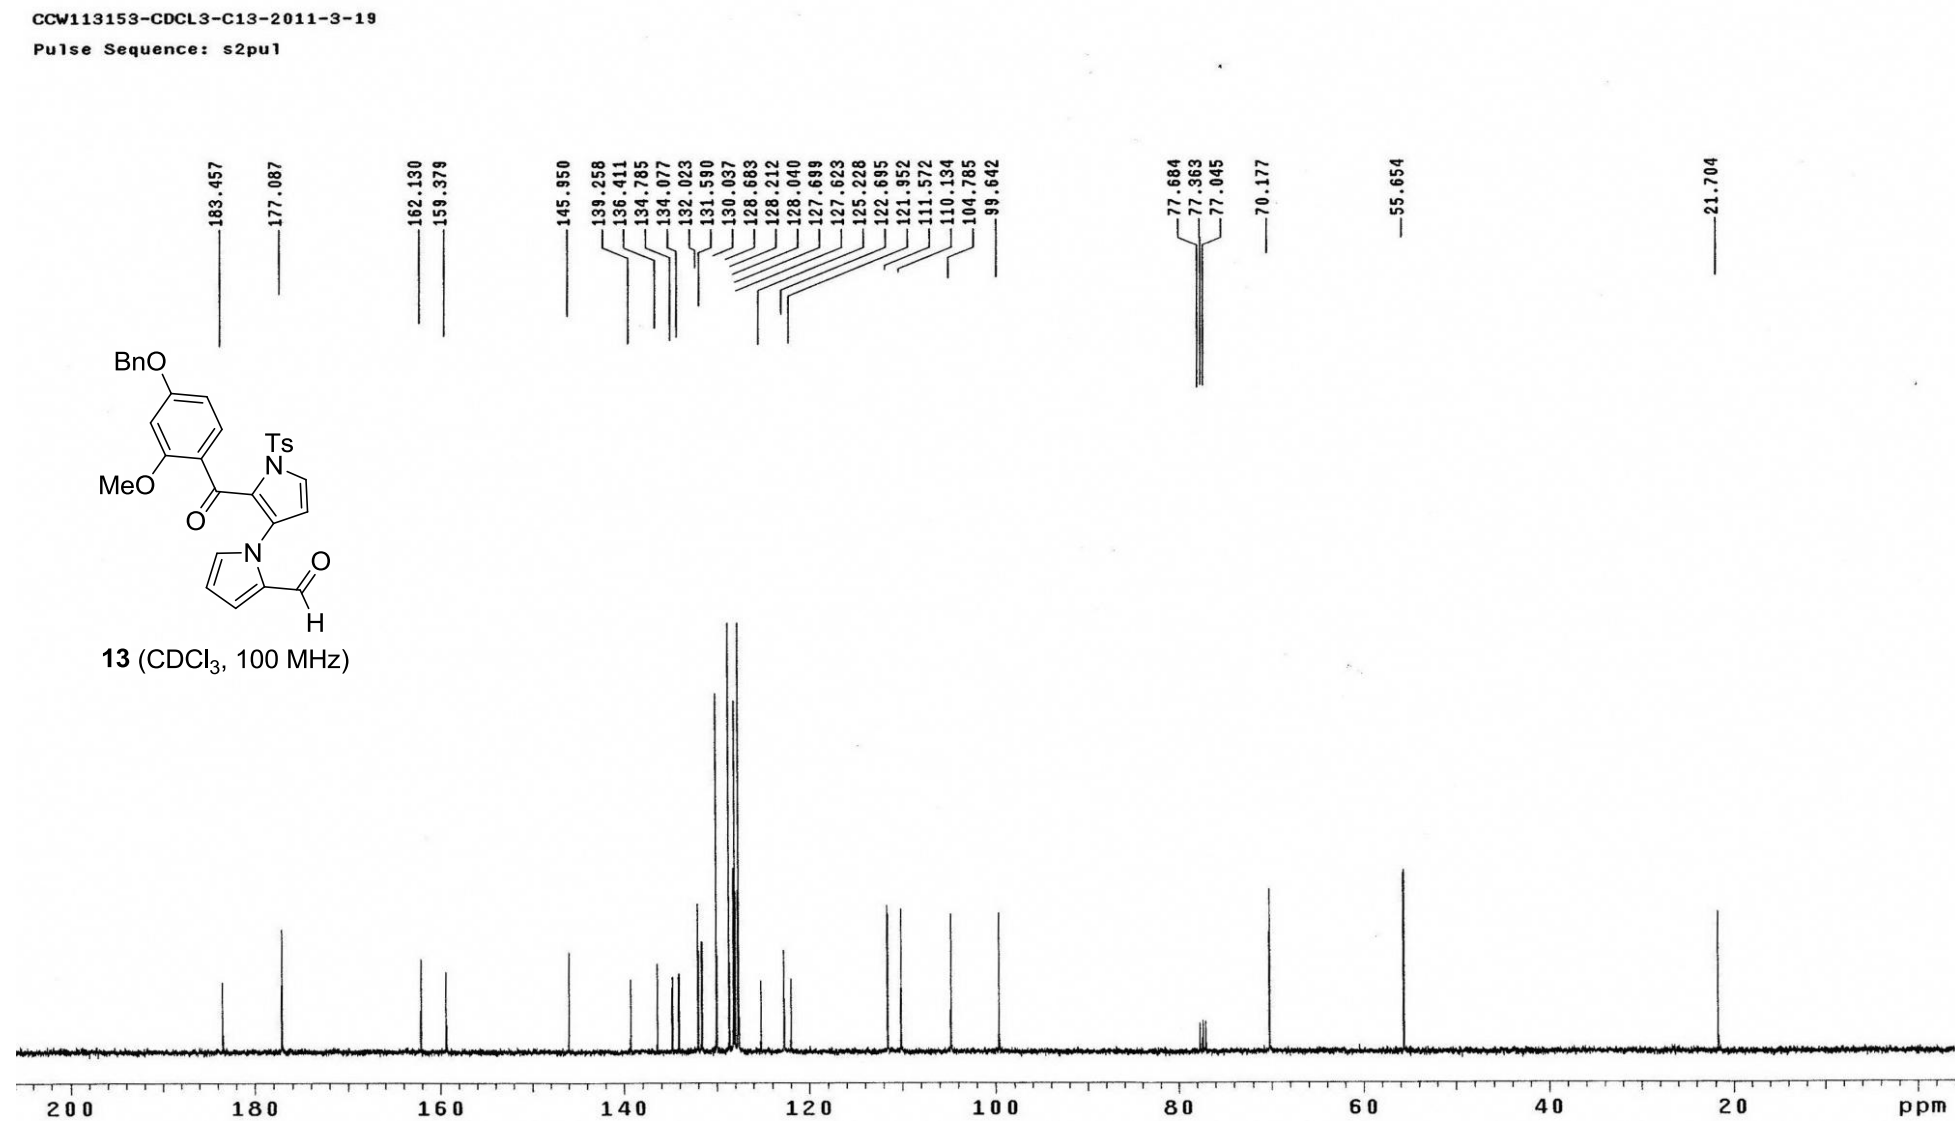

Figure S13.  $^1\text{H}$  NMR spectrum of 14.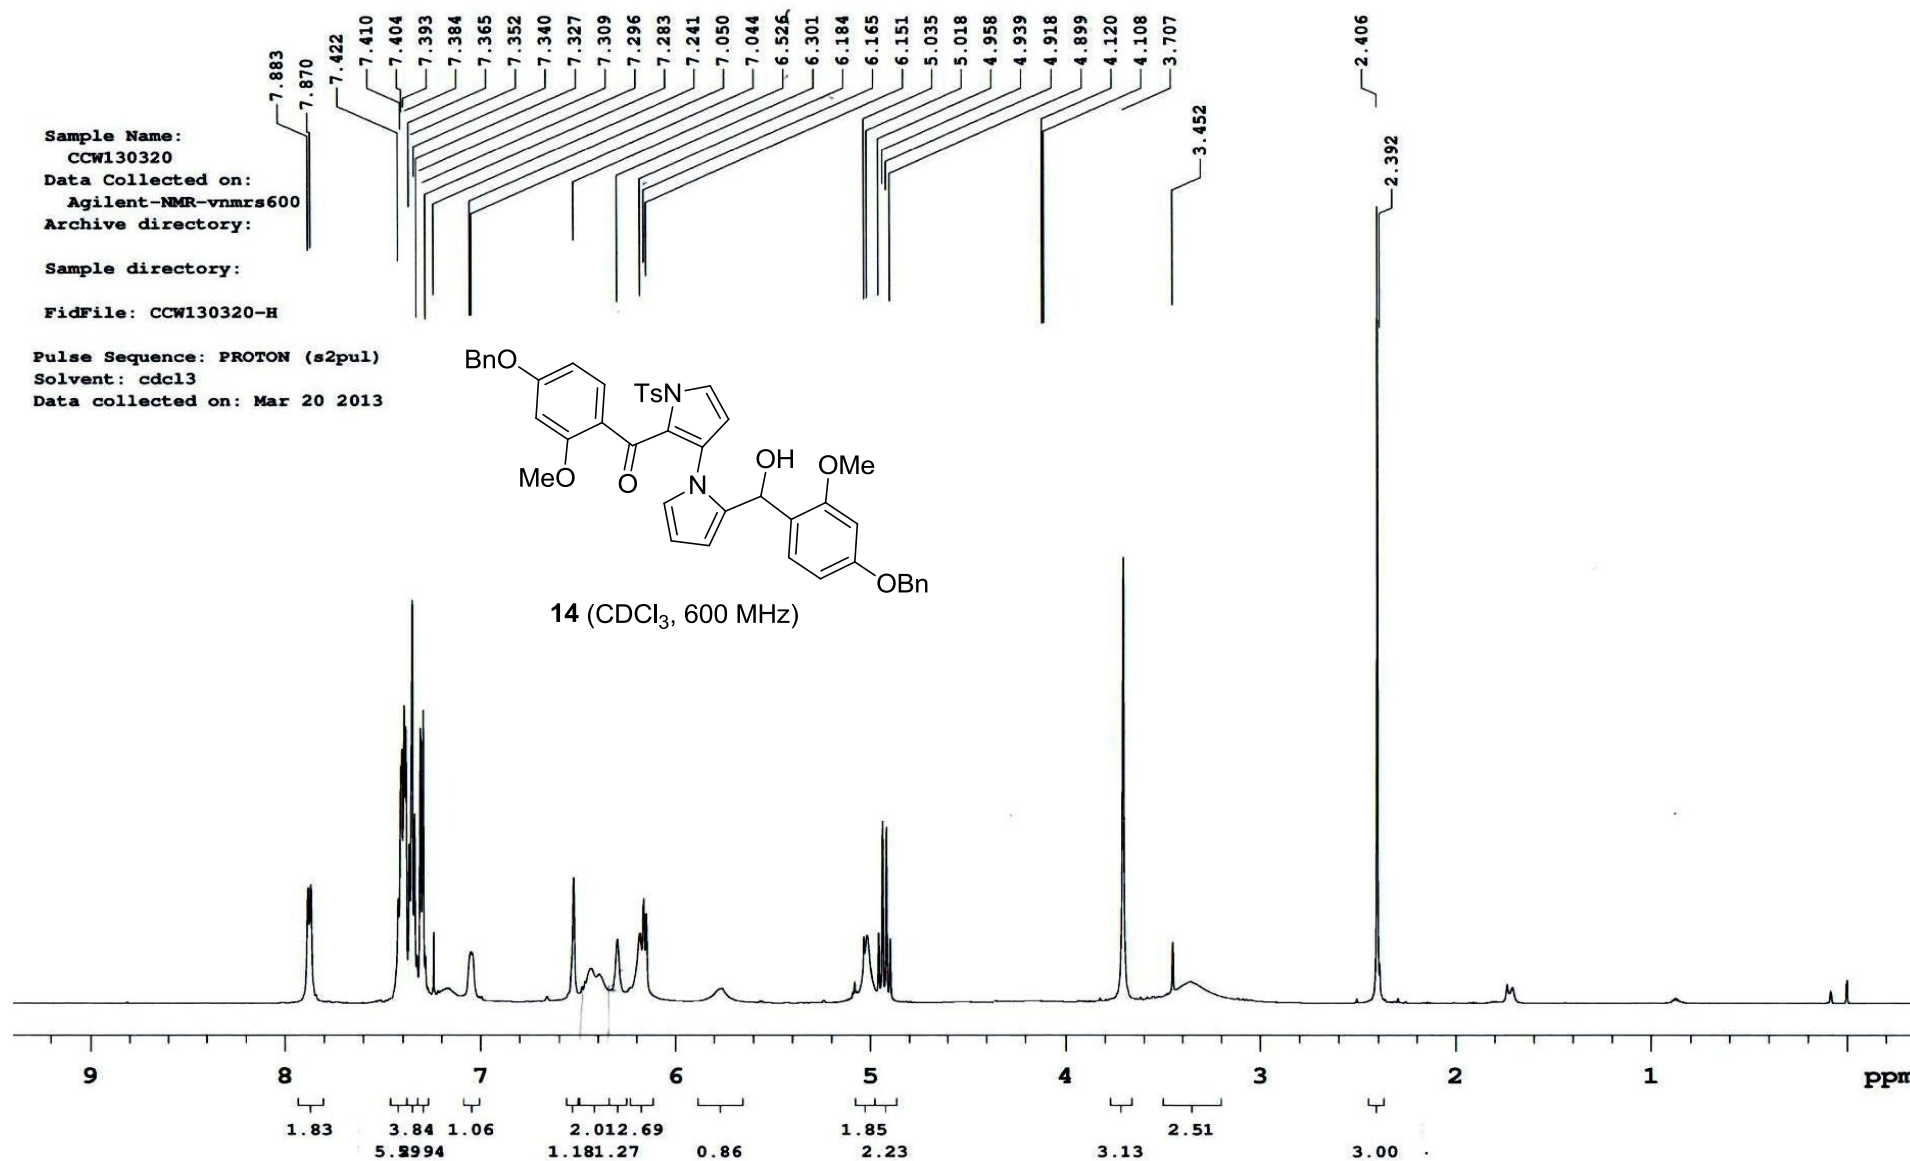

Figure S14.  $^{13}\text{C}$  NMR spectrum of 14.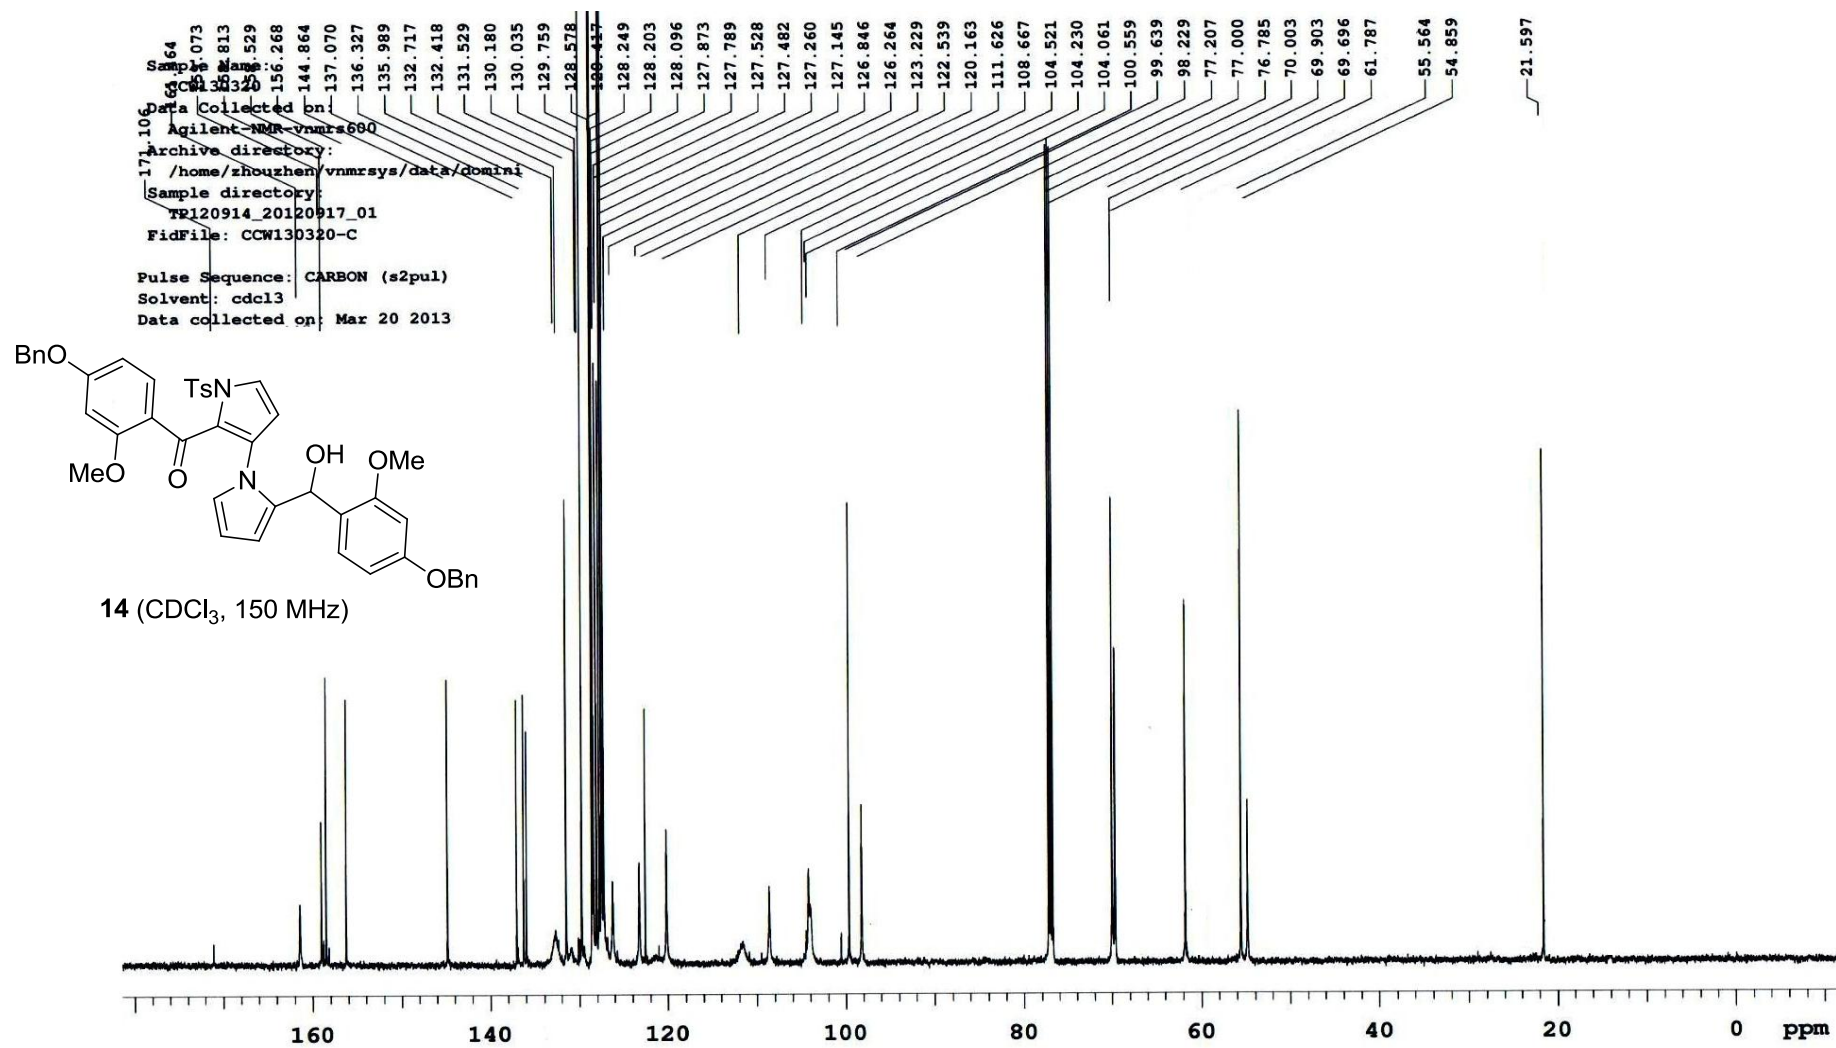

Figure S15.  $^1\text{H}$  NMR spectrum of 14A.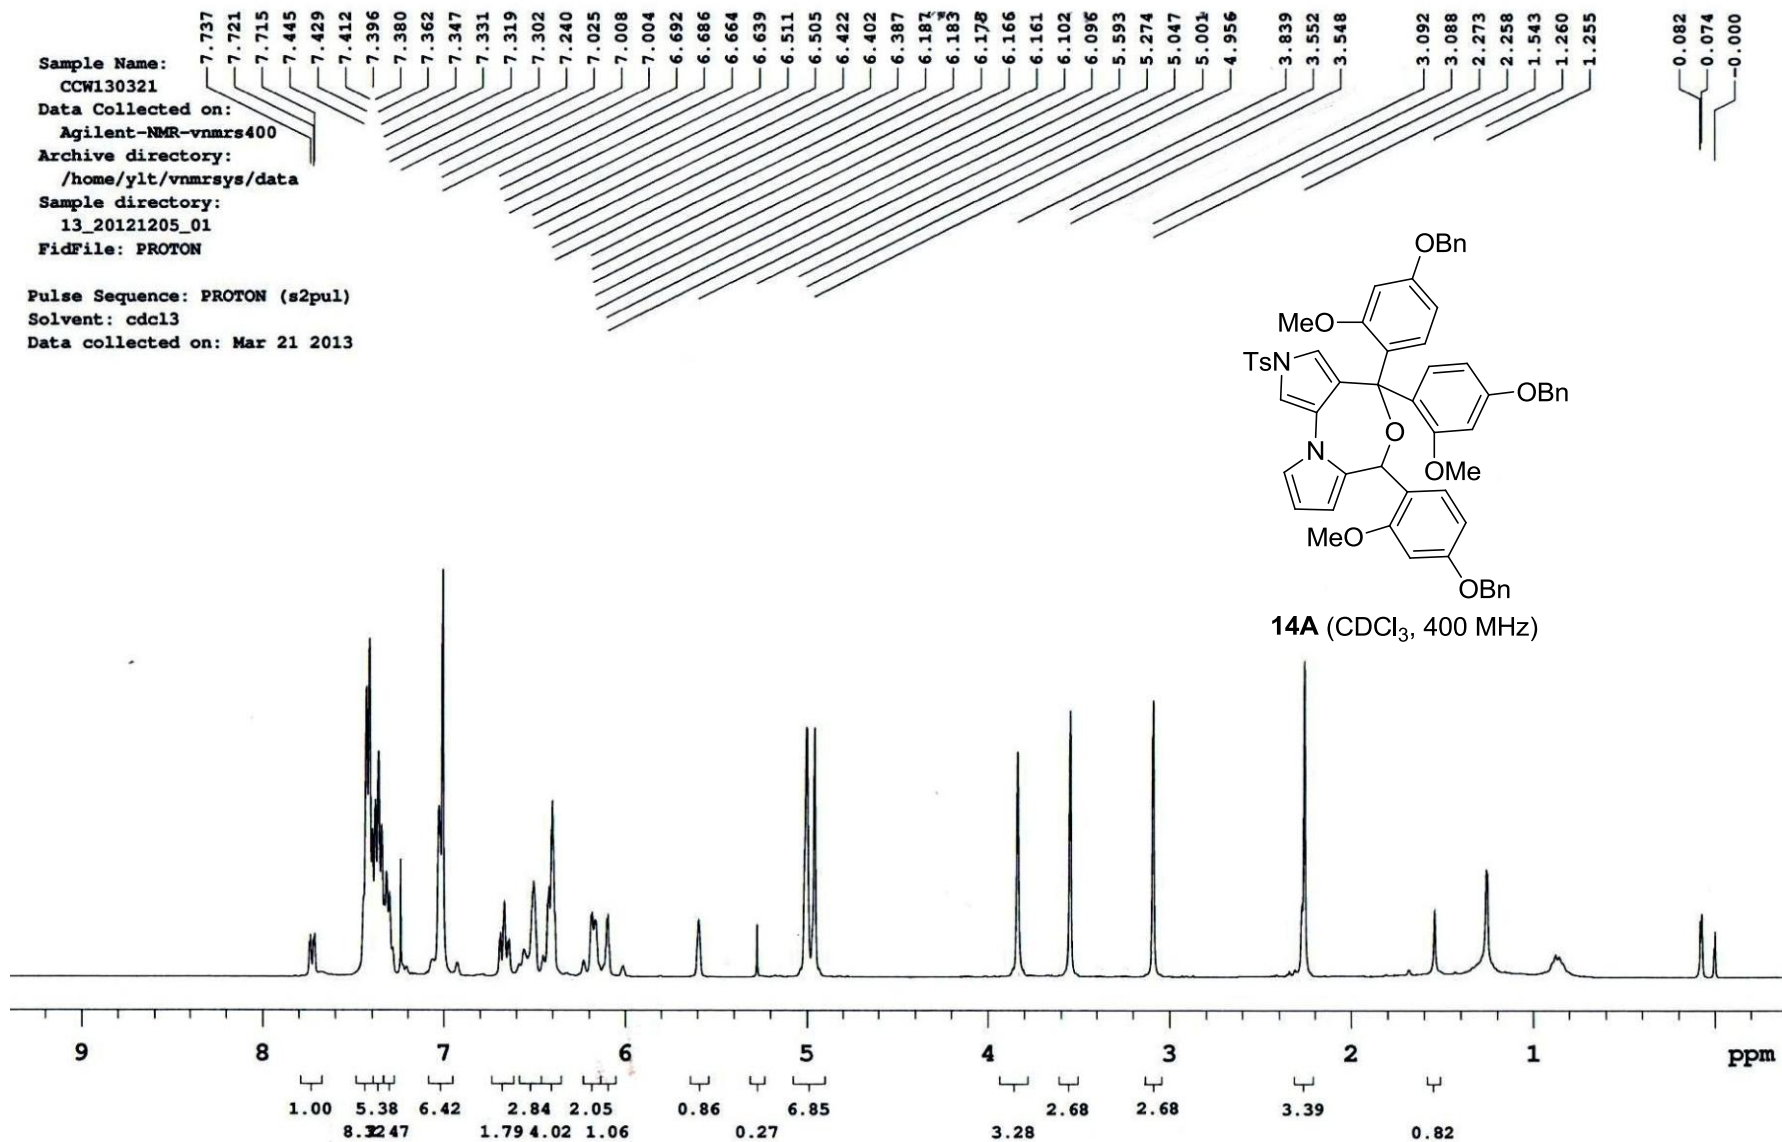







Figure S17.  $^1\text{H}$  NMR spectrum of 15.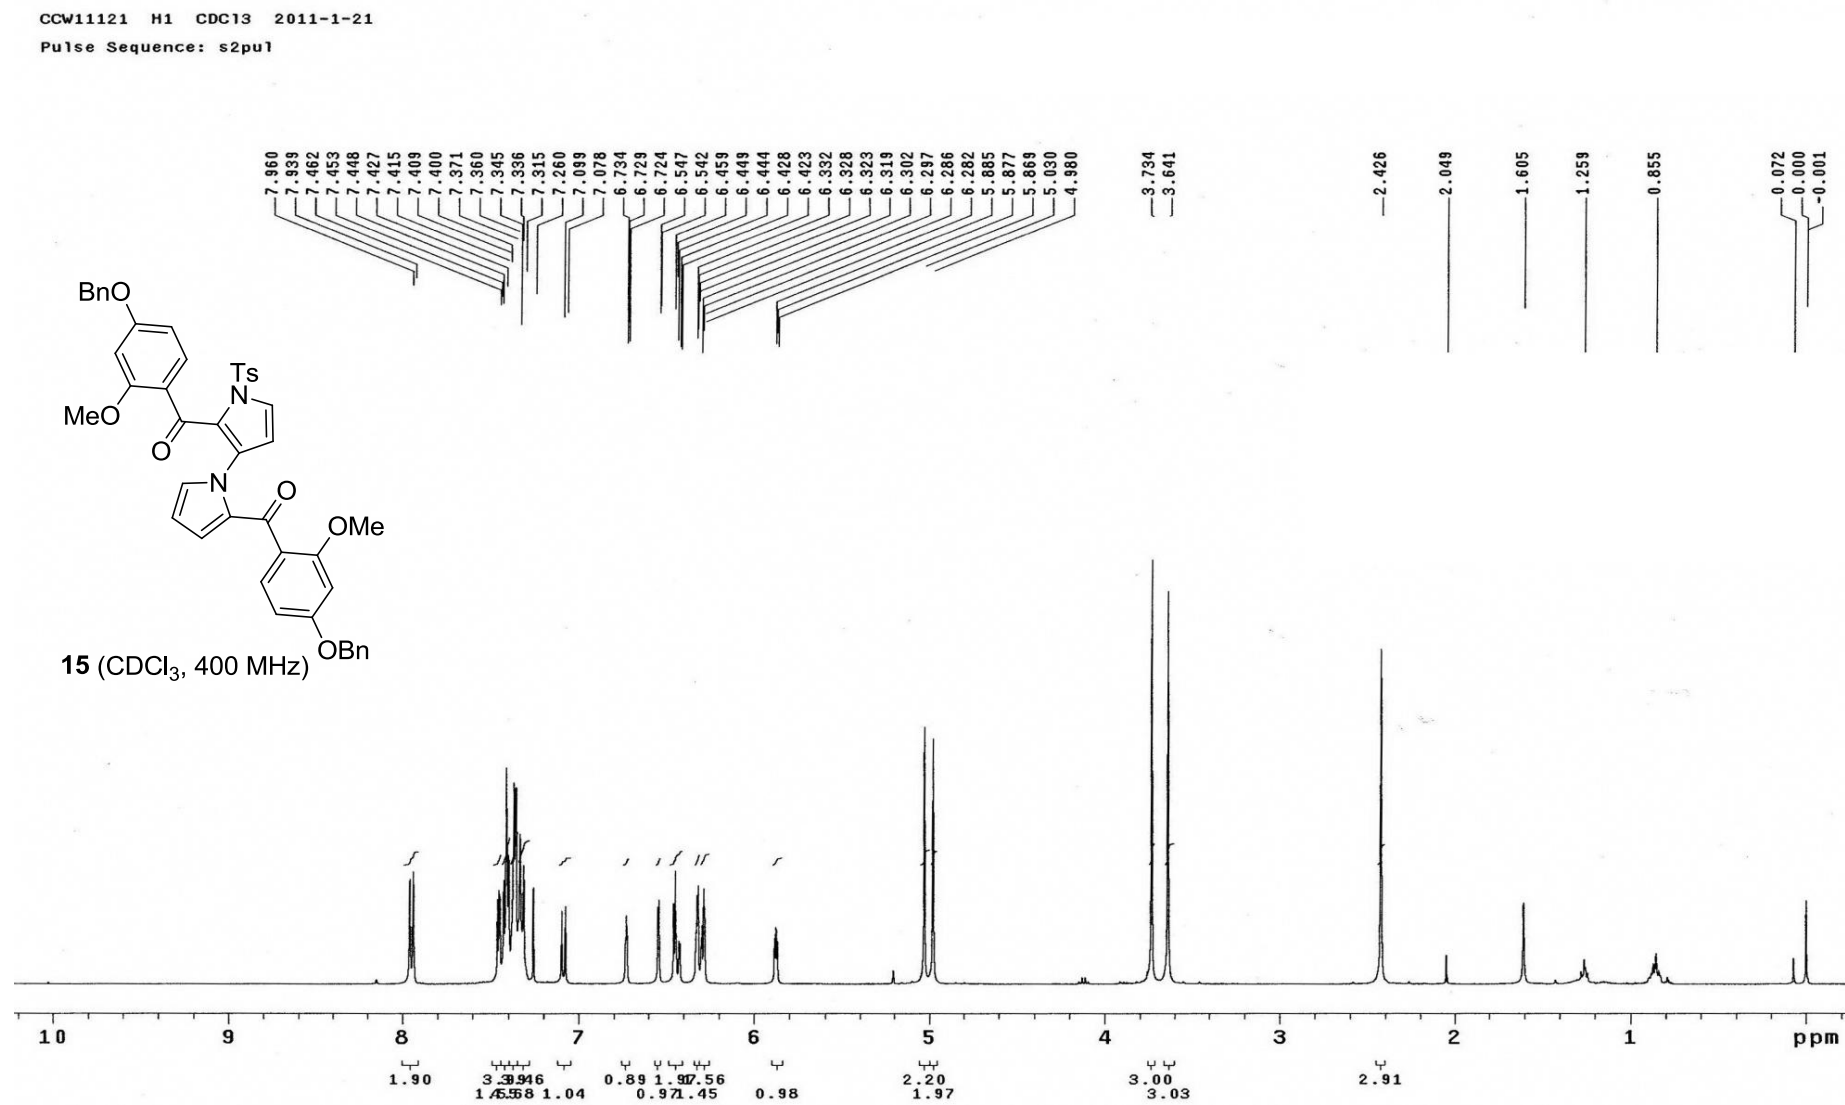

Figure S18.  $^{13}\text{C}$  NMR spectrum of 15.

CCW11411-CDCL3-C13-2011-4-11

Pulse Sequence: s2pu1

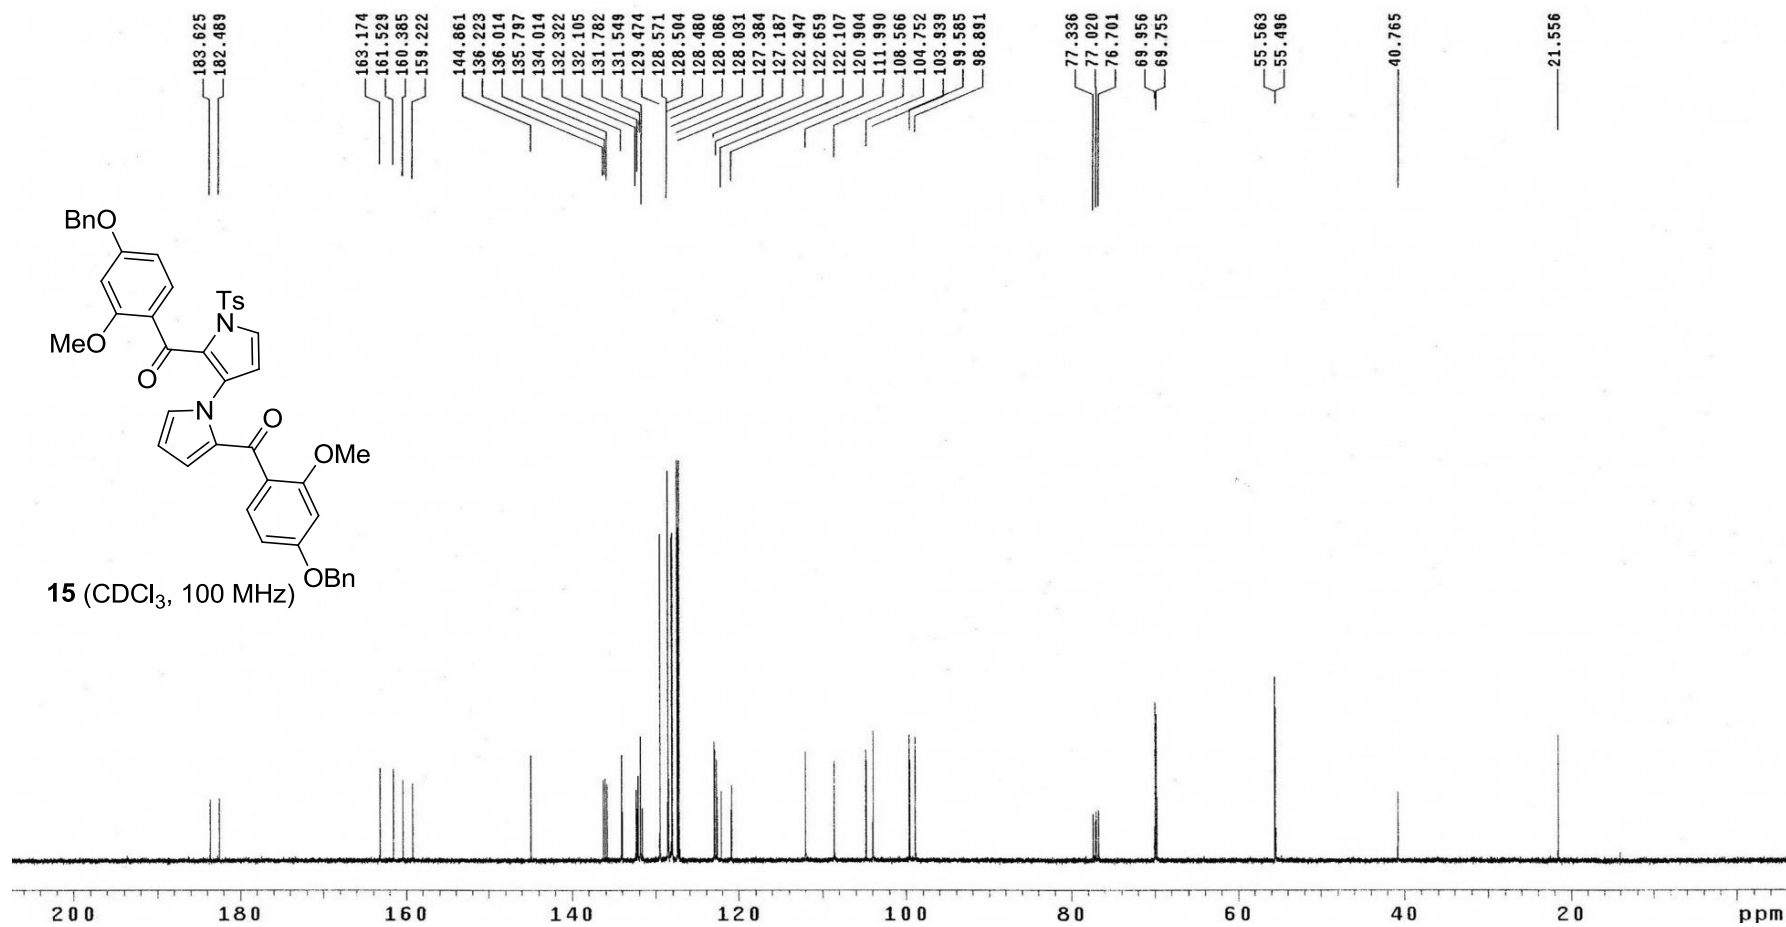

Figure S19.  $^1\text{H}$  NMR spectrum of 16.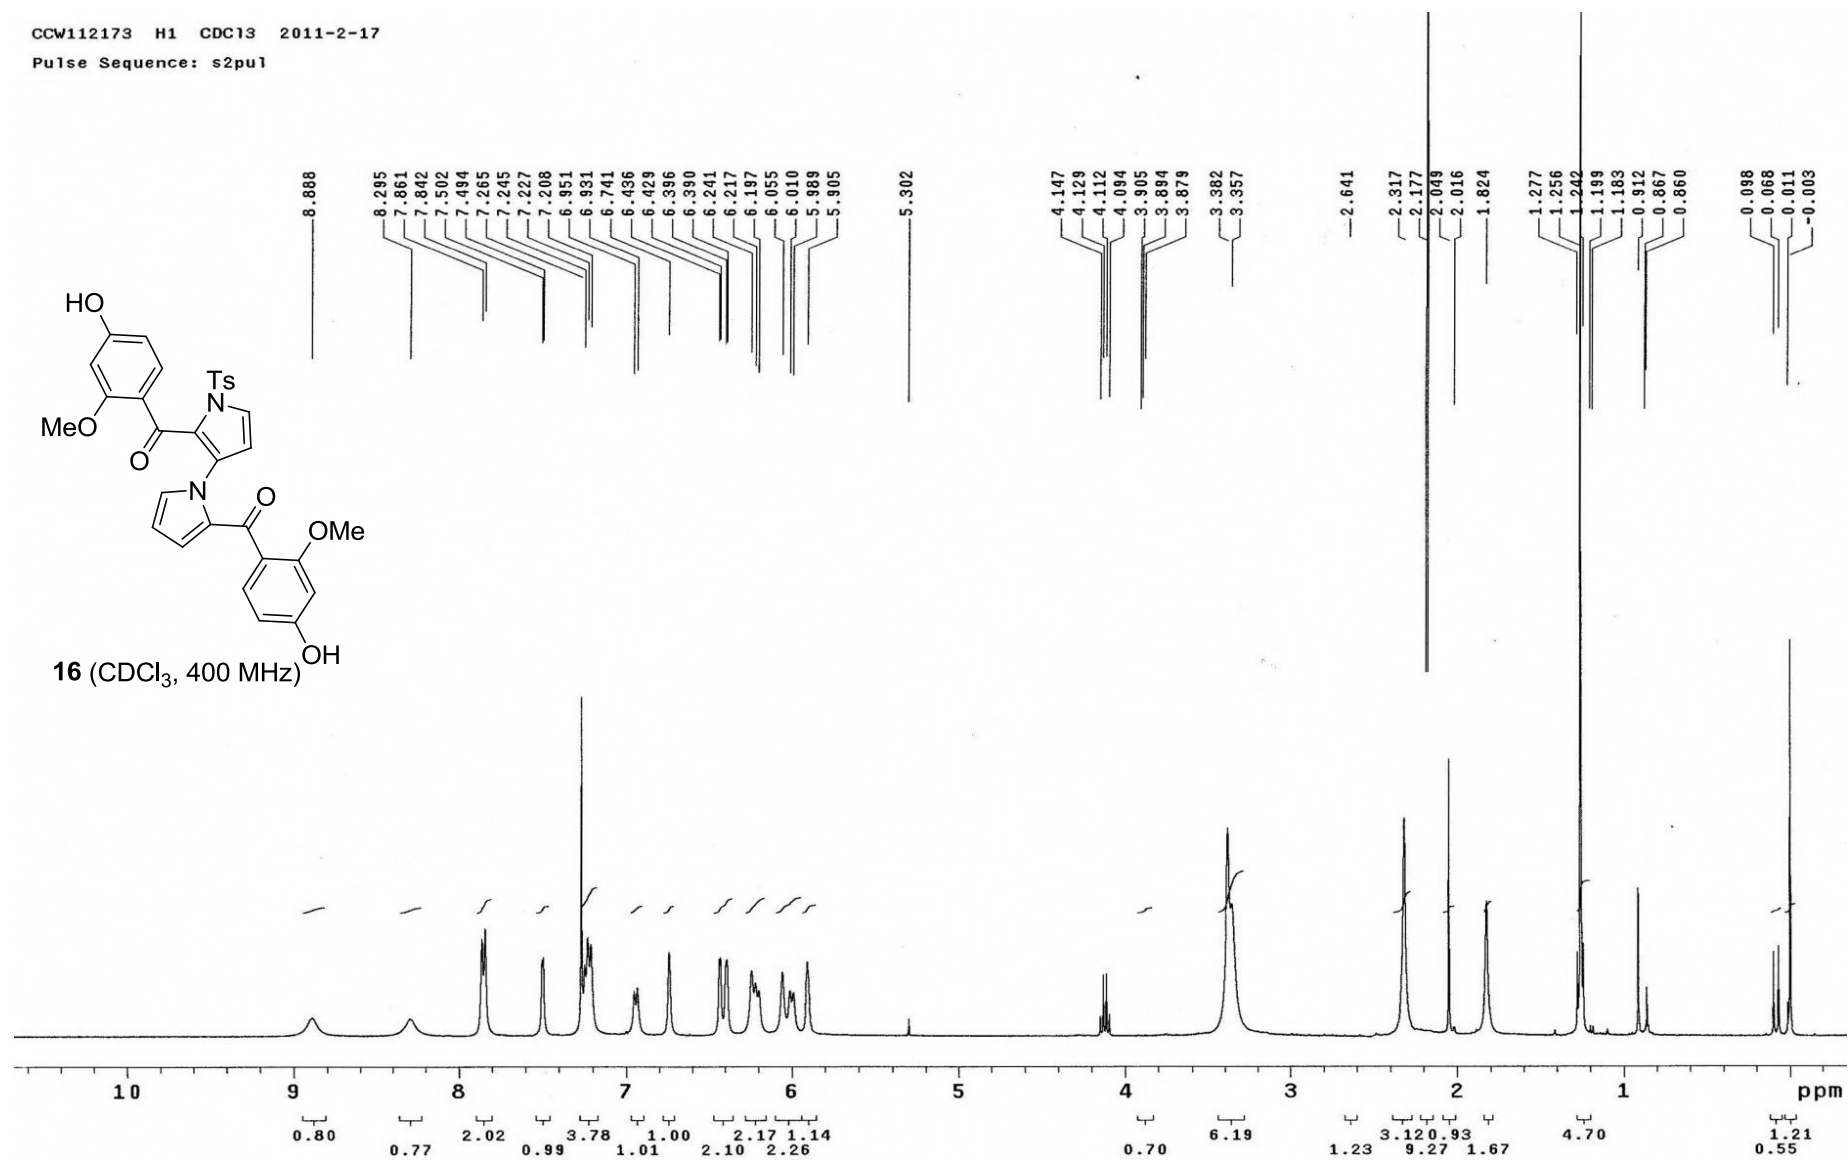

Figure S20.  $^{13}\text{C}$  NMR spectrum of 16.

CCW110415A-C3D60-C13-2011-4-16

Pulse Sequence: s2pu1

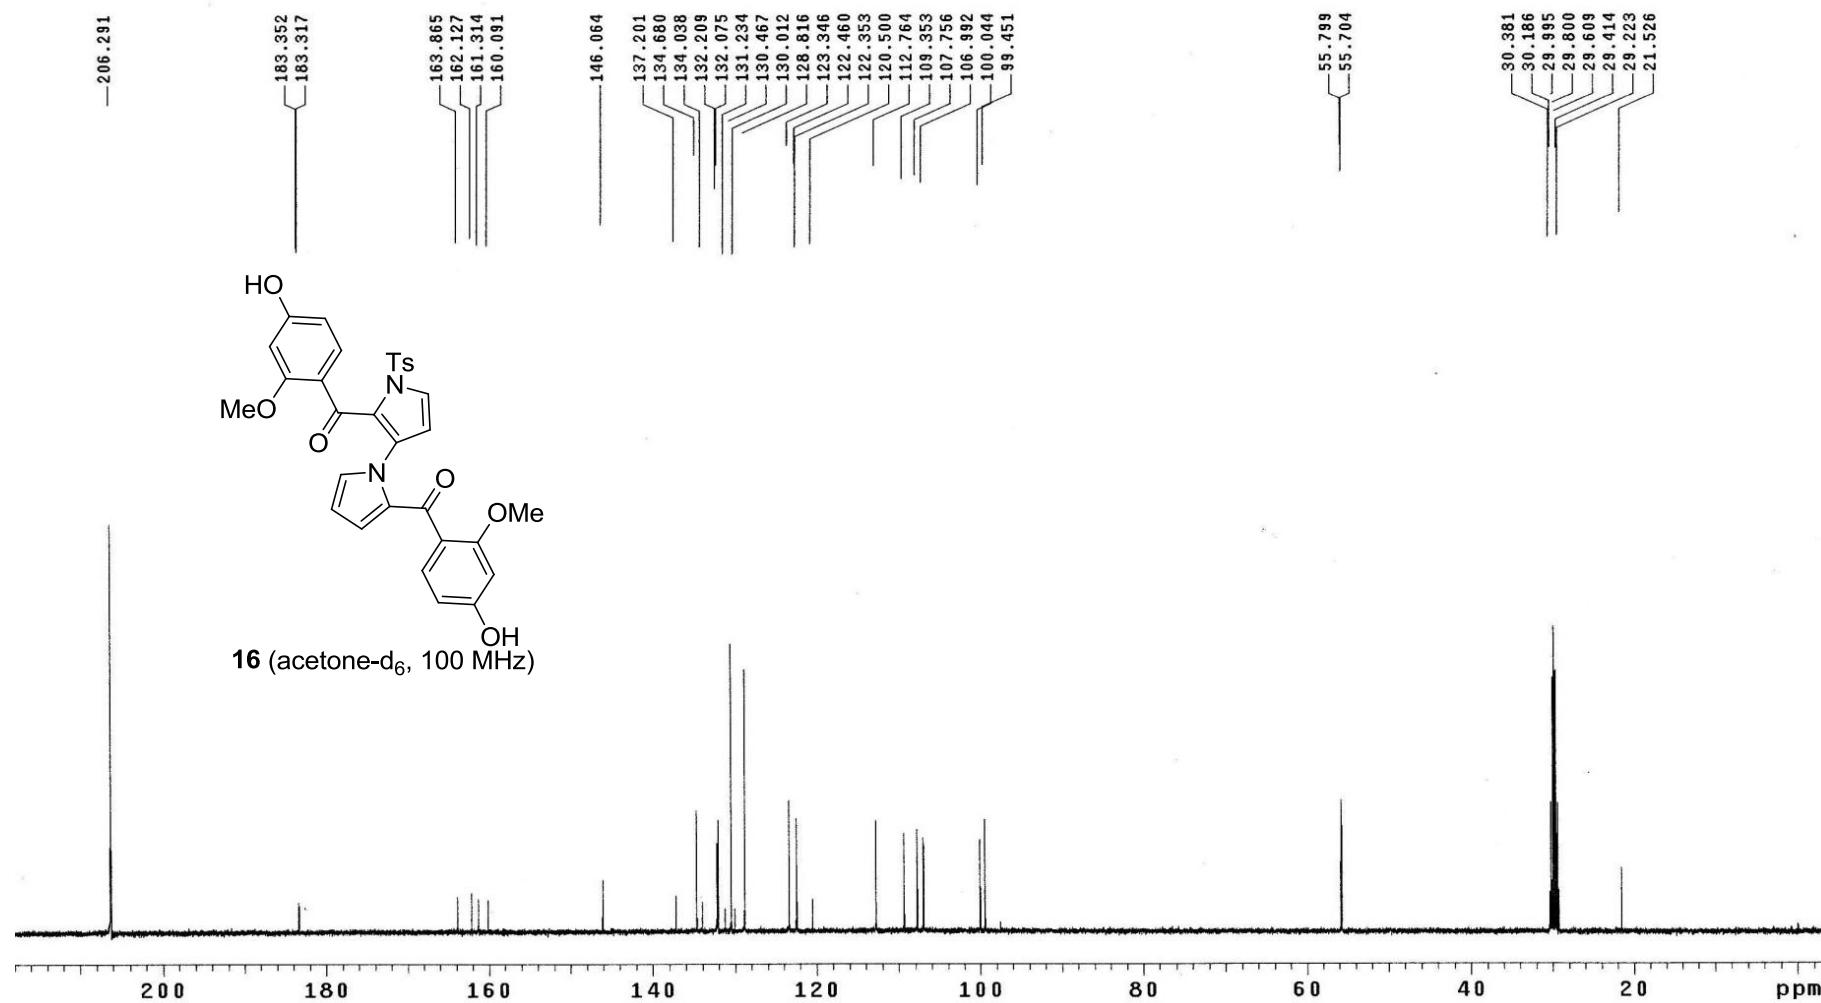

Figure S21.  $^1\text{H}$  NMR spectrum of 17.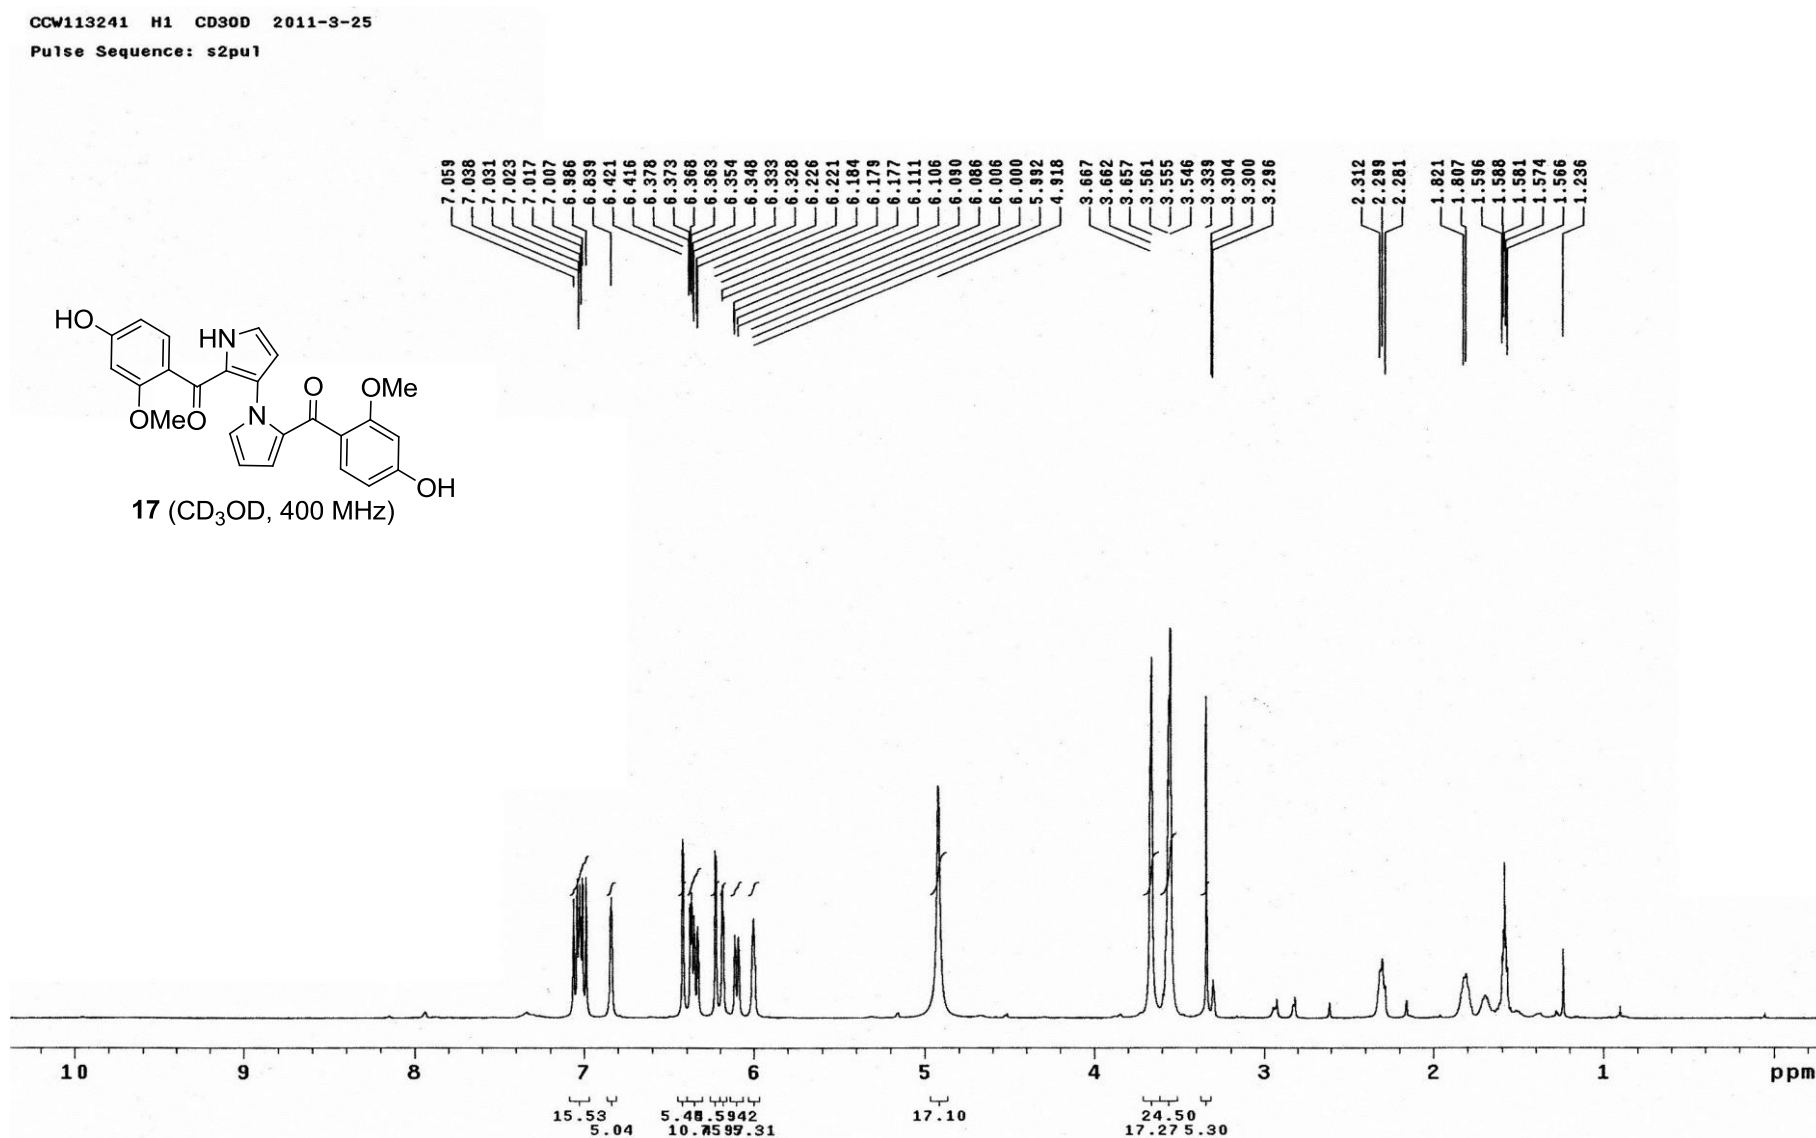

Figure S22.  $^{13}\text{C}$  NMR spectrum of 17.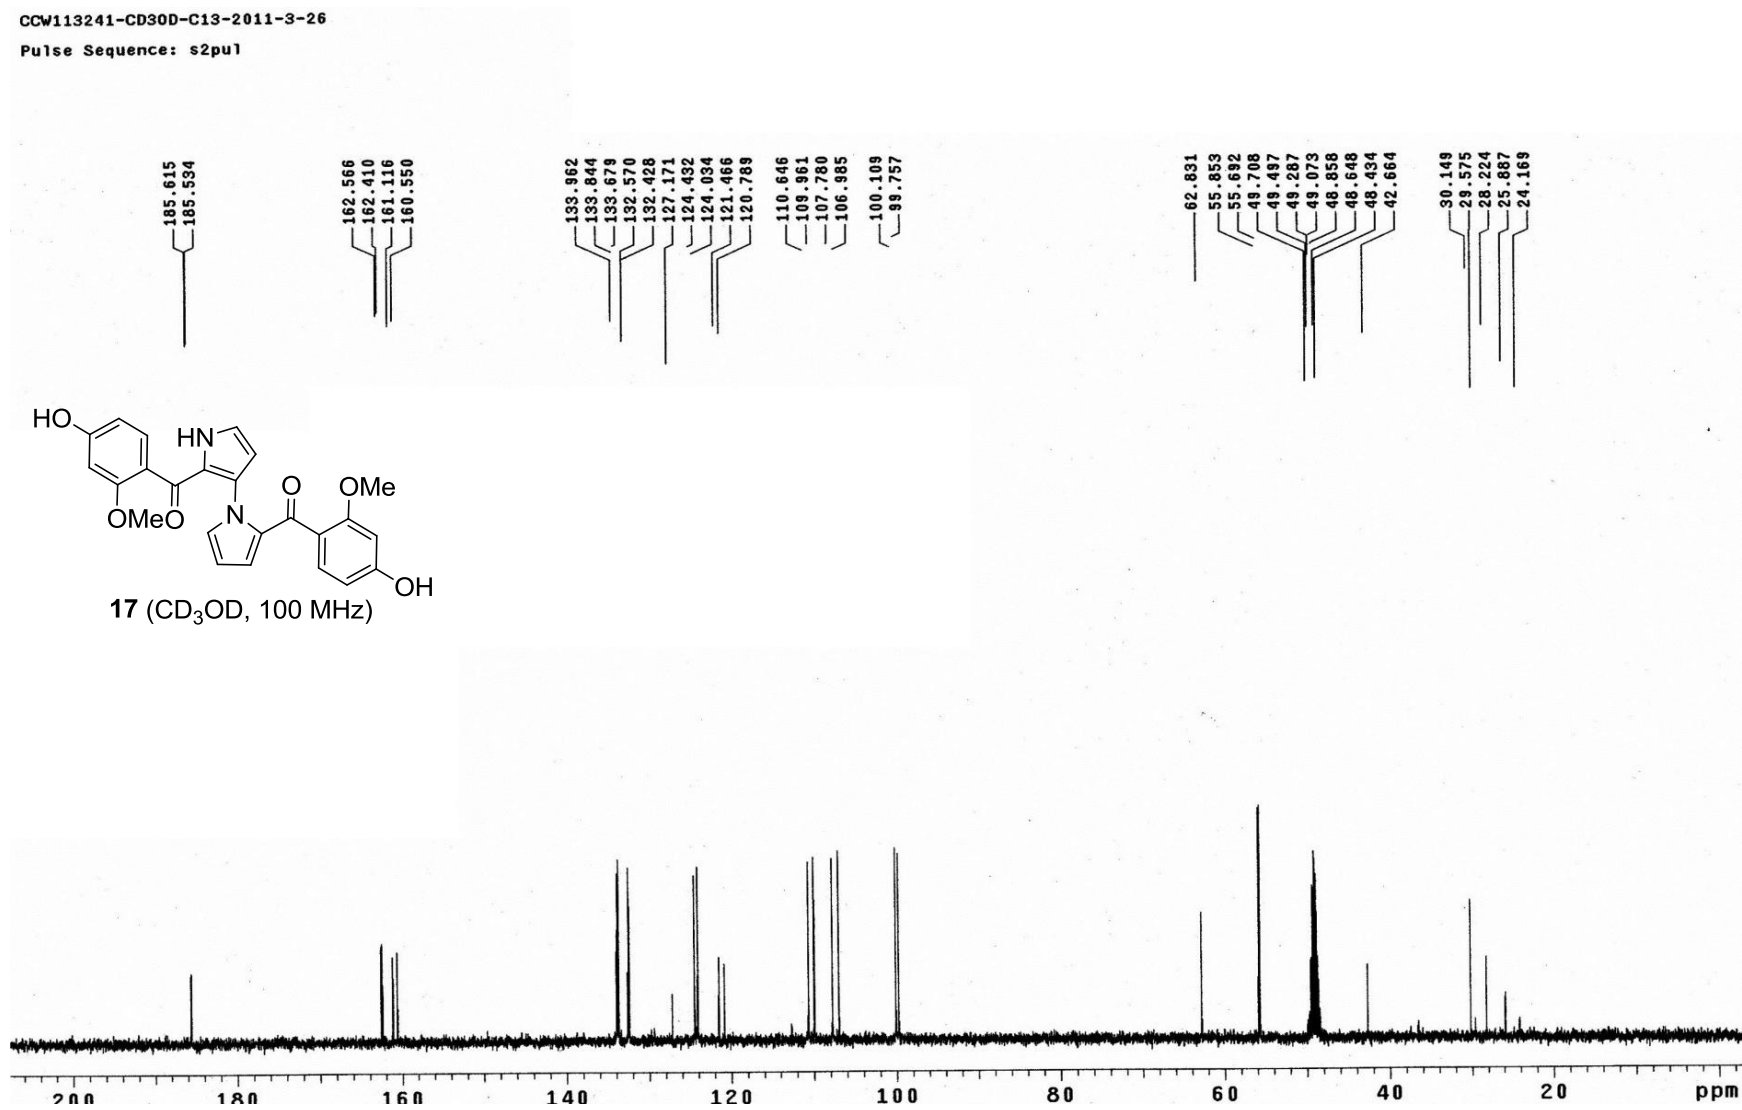

Figure S23.  $^1\text{H}$  NMR spectrum of 18.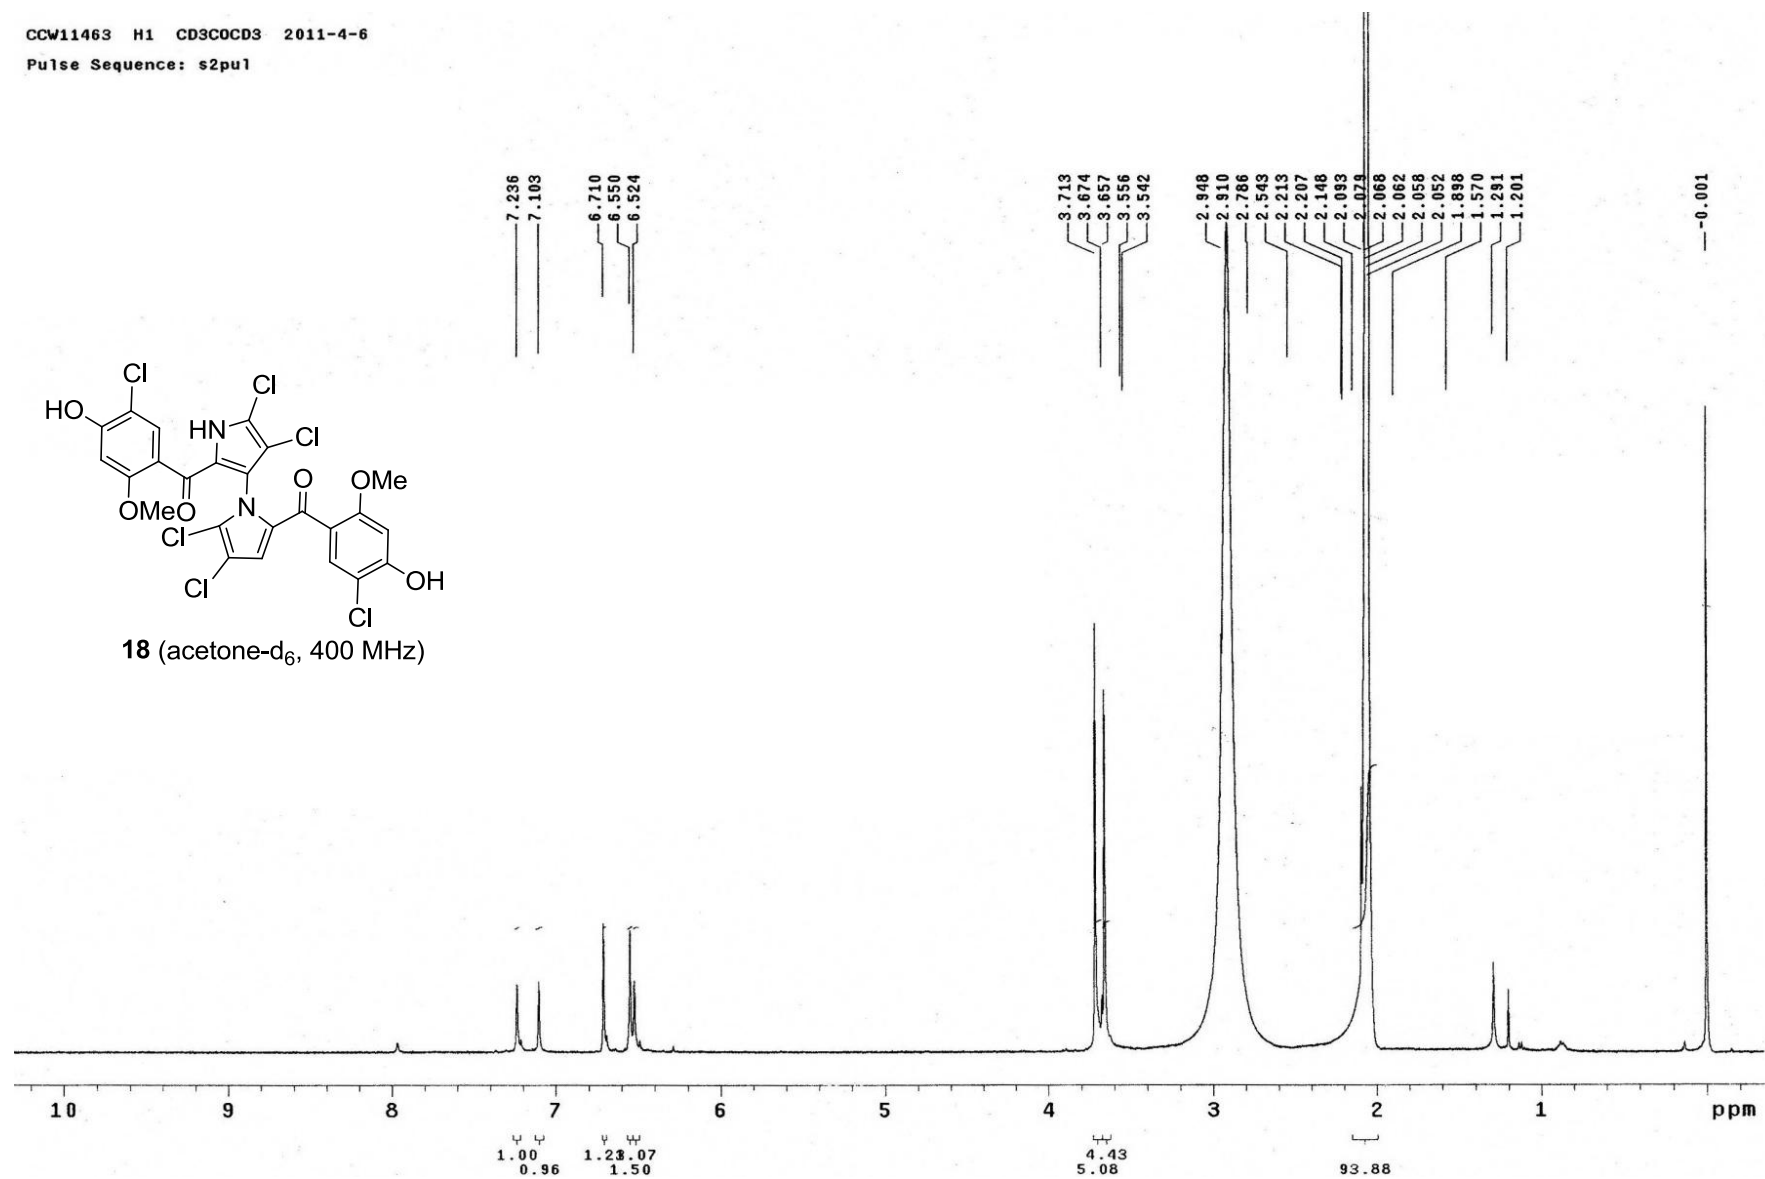

Figure S24.  $^{13}\text{C}$  NMR spectrum of 18.

CCW11482 C13 CDC13+CD3OD 2011-4-10

Pulse Sequence: s2pu1

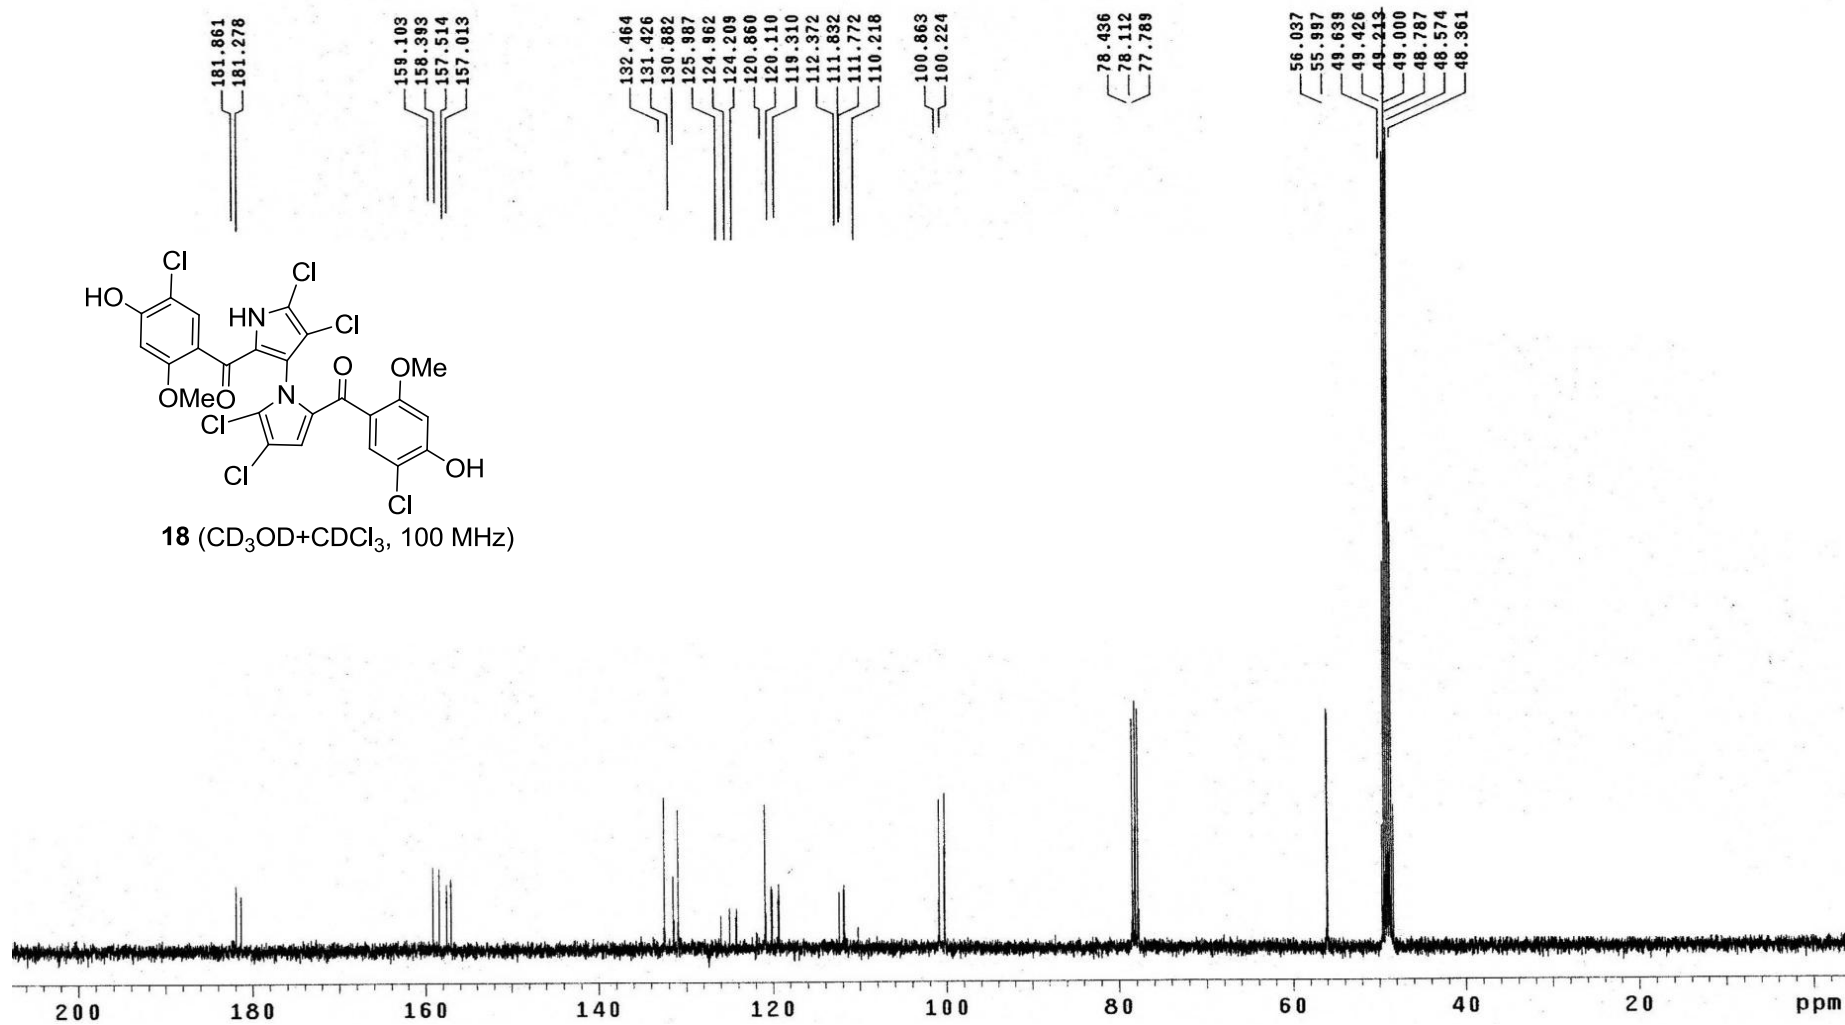



Figure S25.  $^1\text{H}$  NMR spectrum of **19**.

CCW11414 H1 CD3OD 2011-4-14  
Pulse Sequence: s2pu1

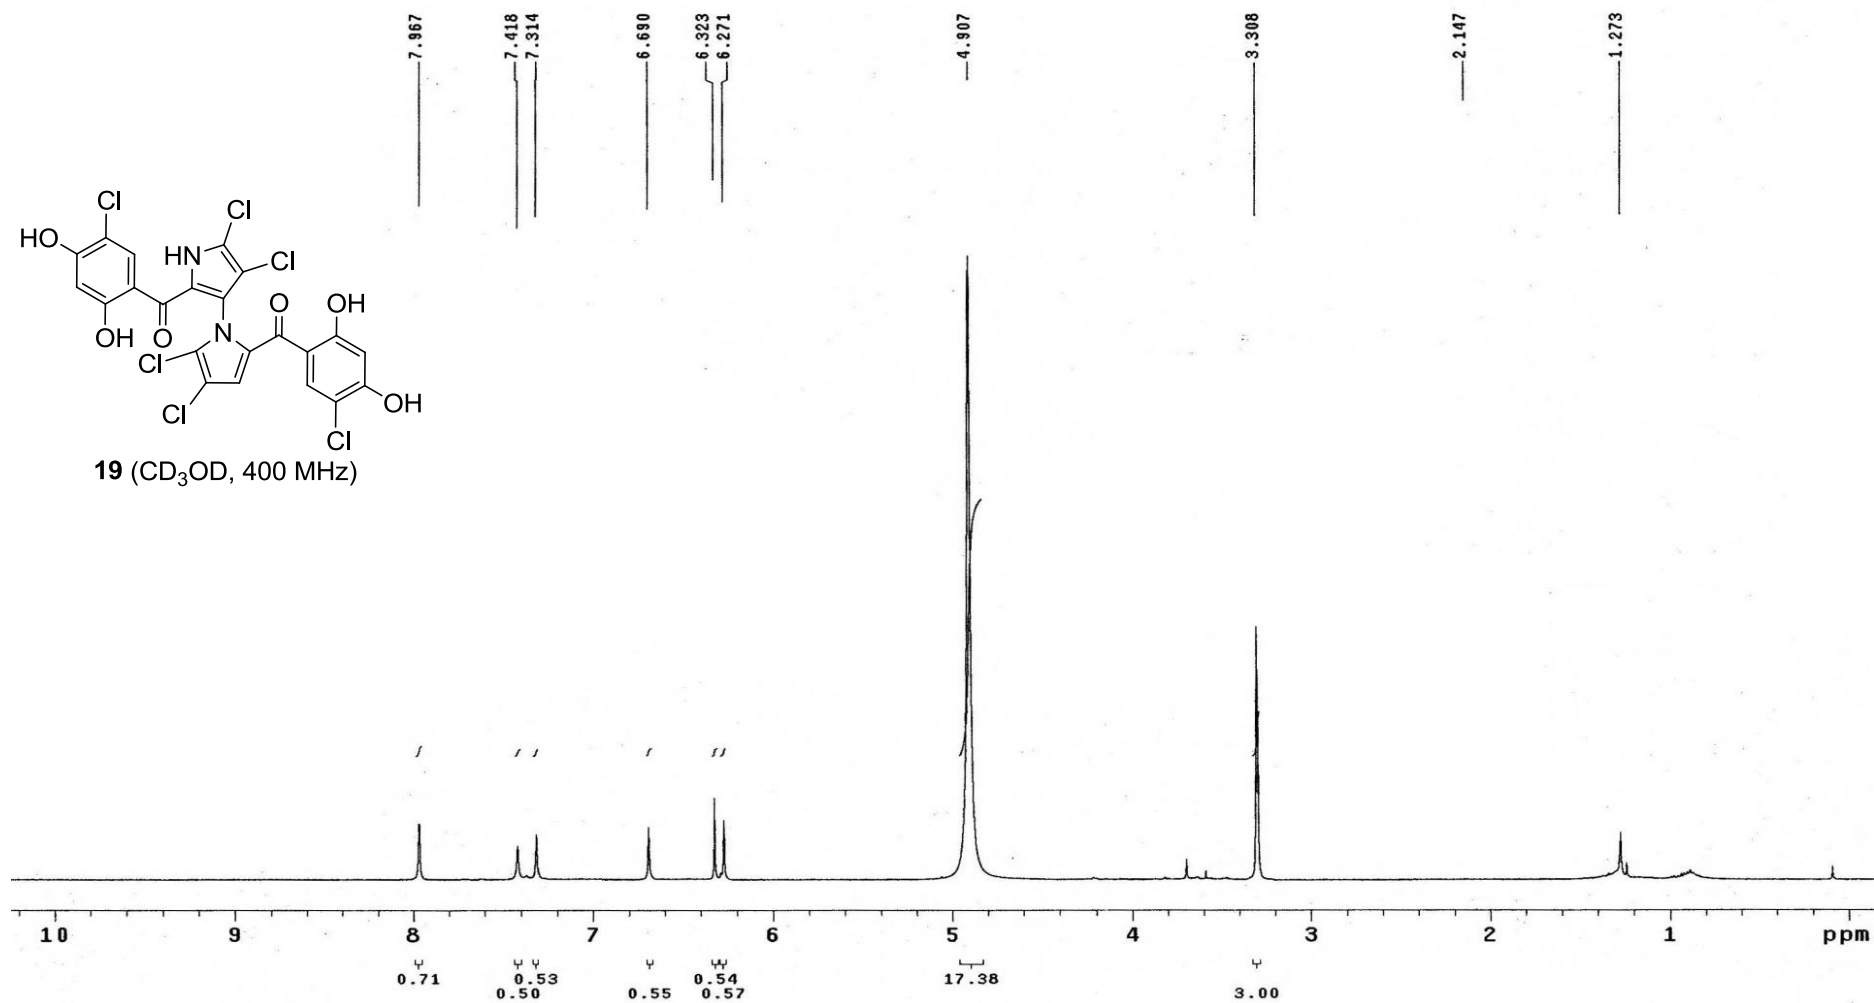

Figure S26.  $^{13}\text{C}$  NMR spectrum of 19.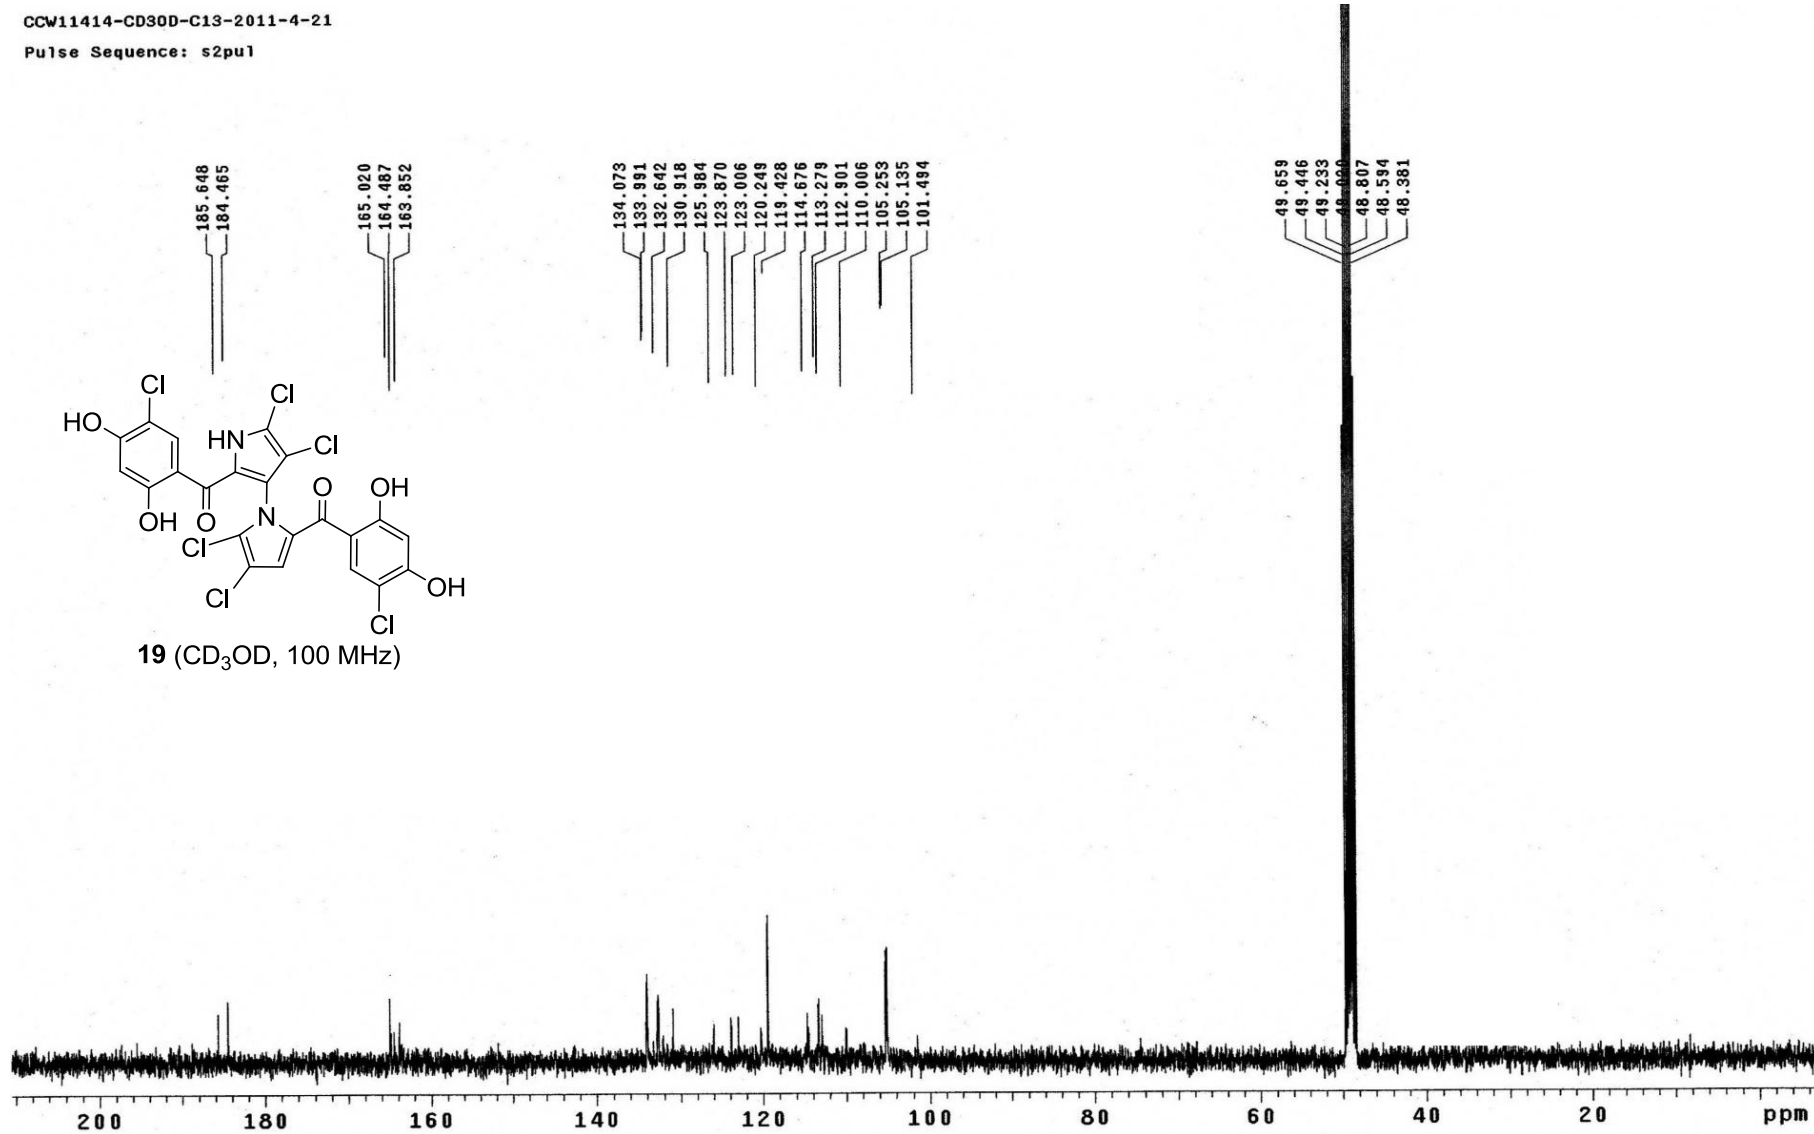

Figure S27.  $^1\text{H}$  NMR spectrum of **20**.

CCW112183 H1 CDC13 2011-2-18

Pulse Sequence: s2pu1

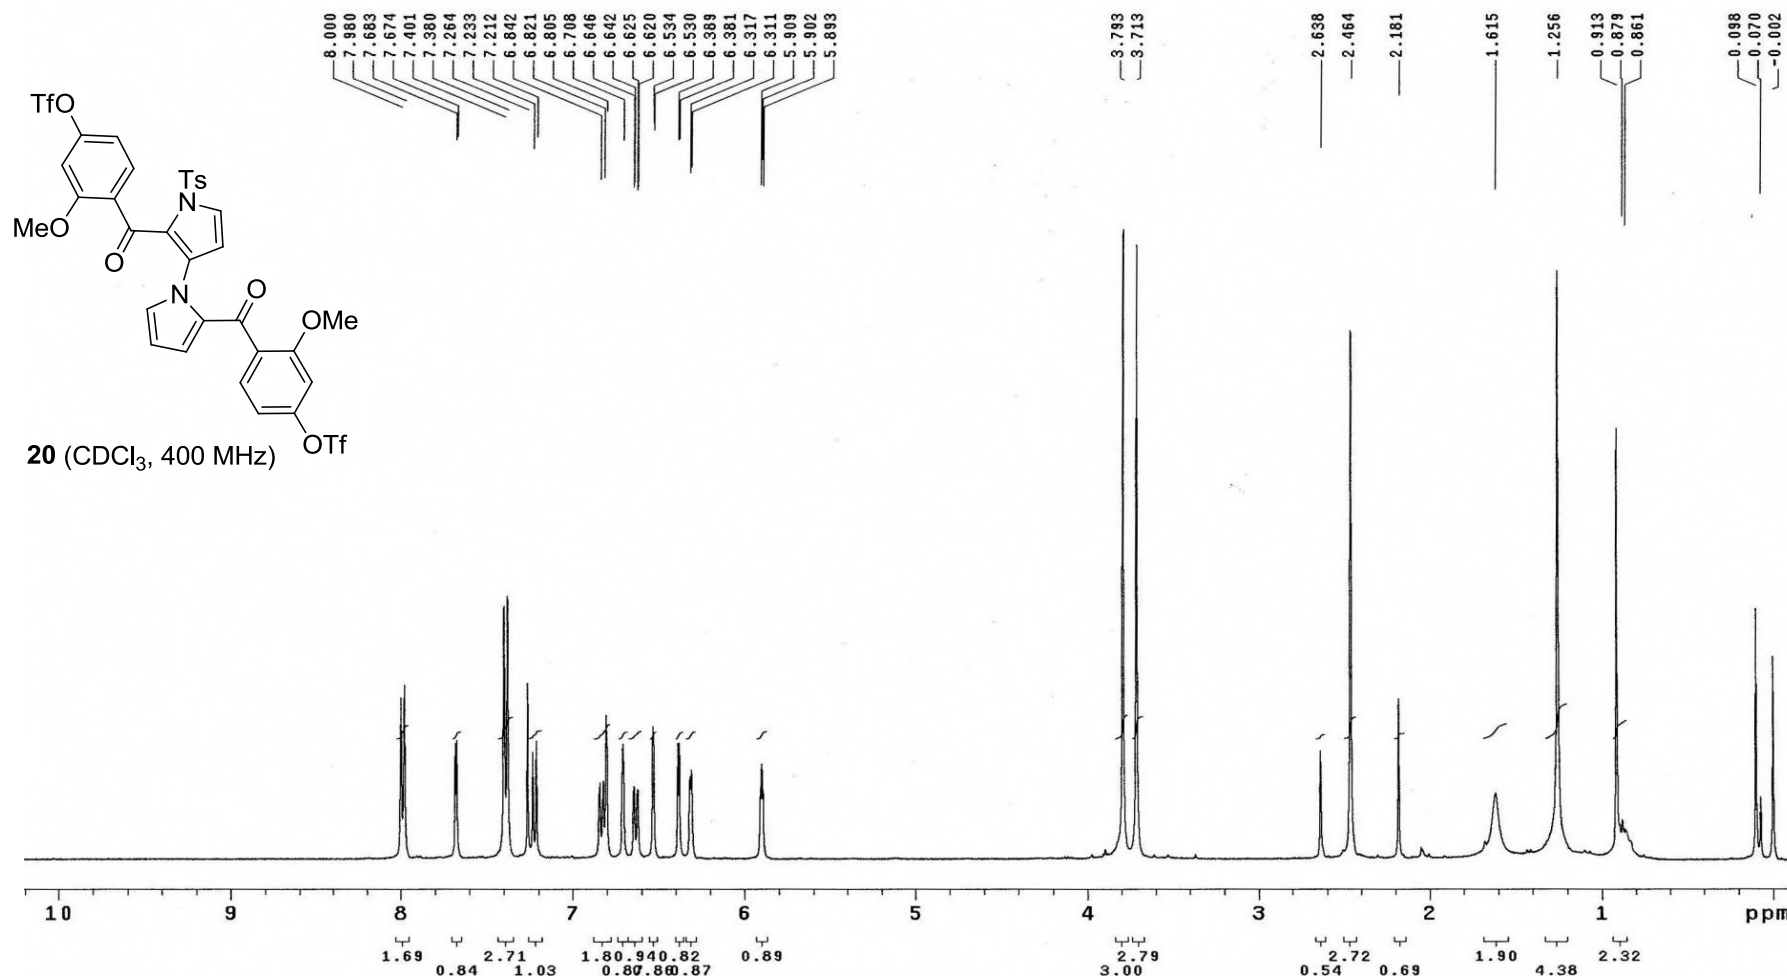

Figure S28.  $^{13}\text{C}$  NMR spectrum of 20.

CCW113251-CDCL3-C13-2011-3-26

Pulse Sequence: s2pu1

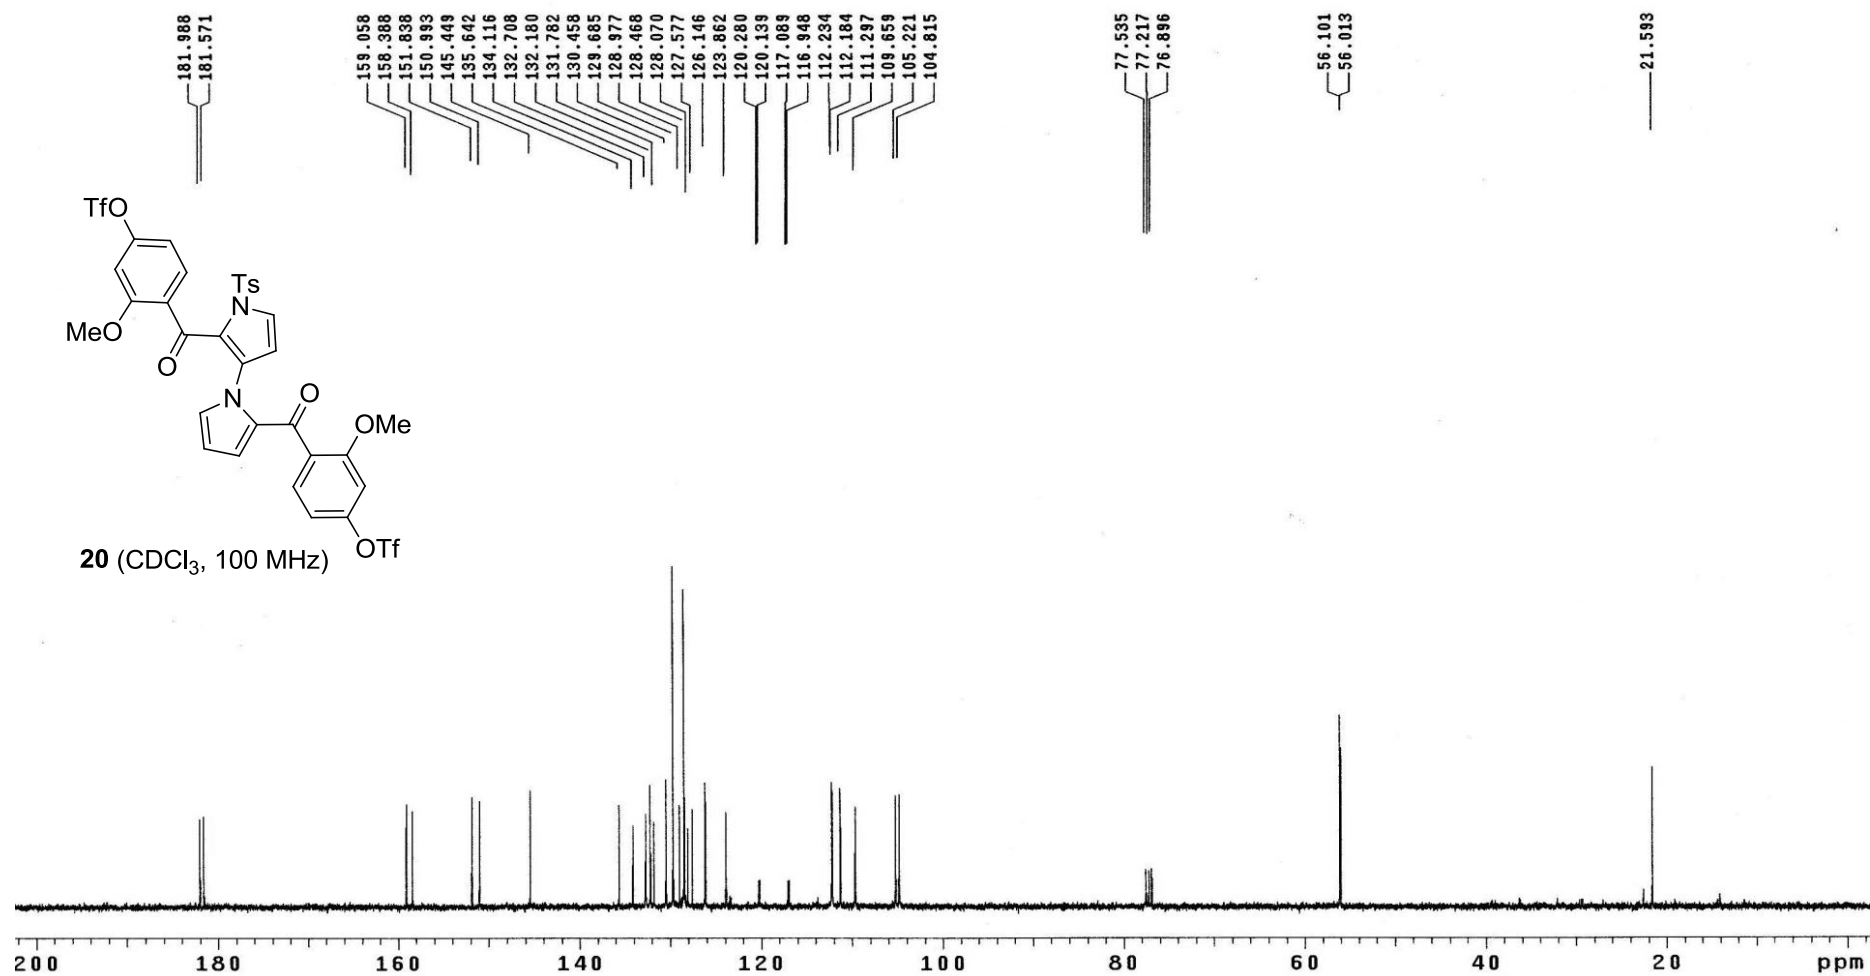

Figure S29.  $^1\text{H}$  NMR spectrum of 21.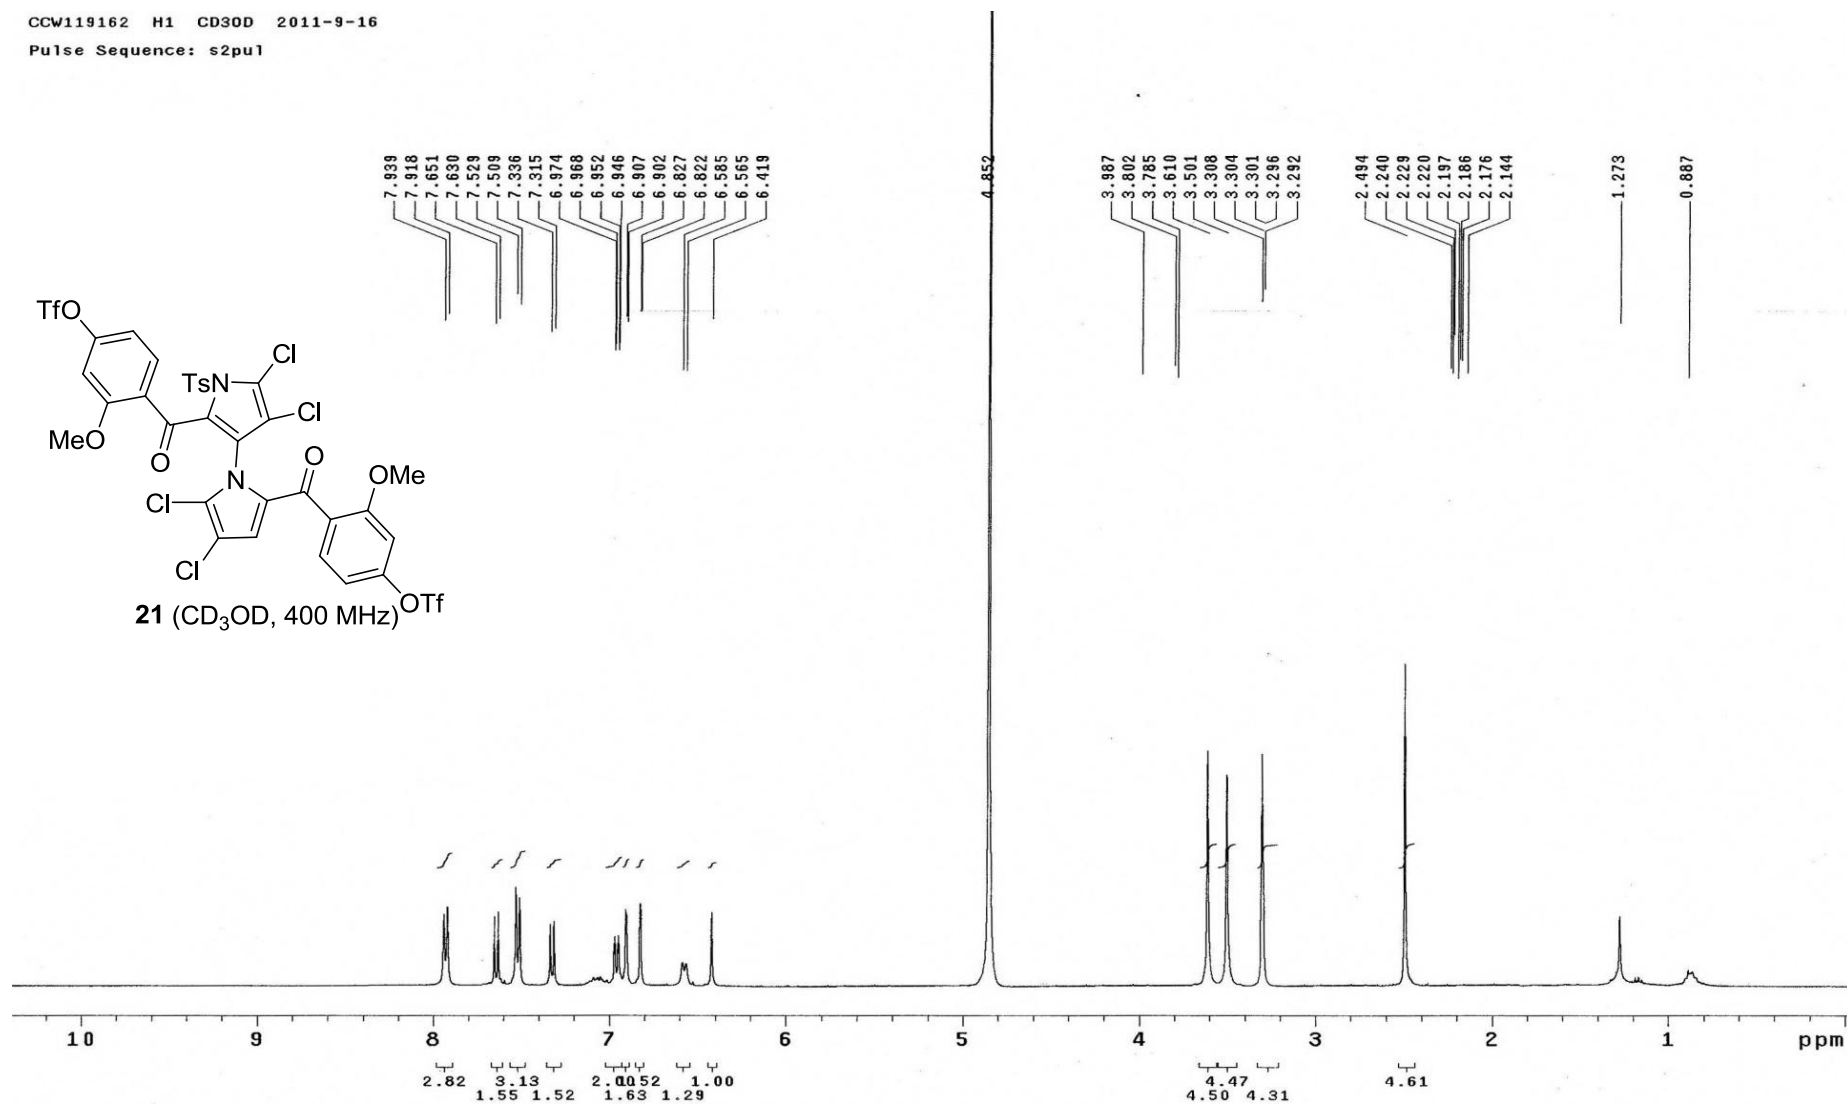

Figure S30.  $^{13}\text{C}$  NMR spectrum of 21.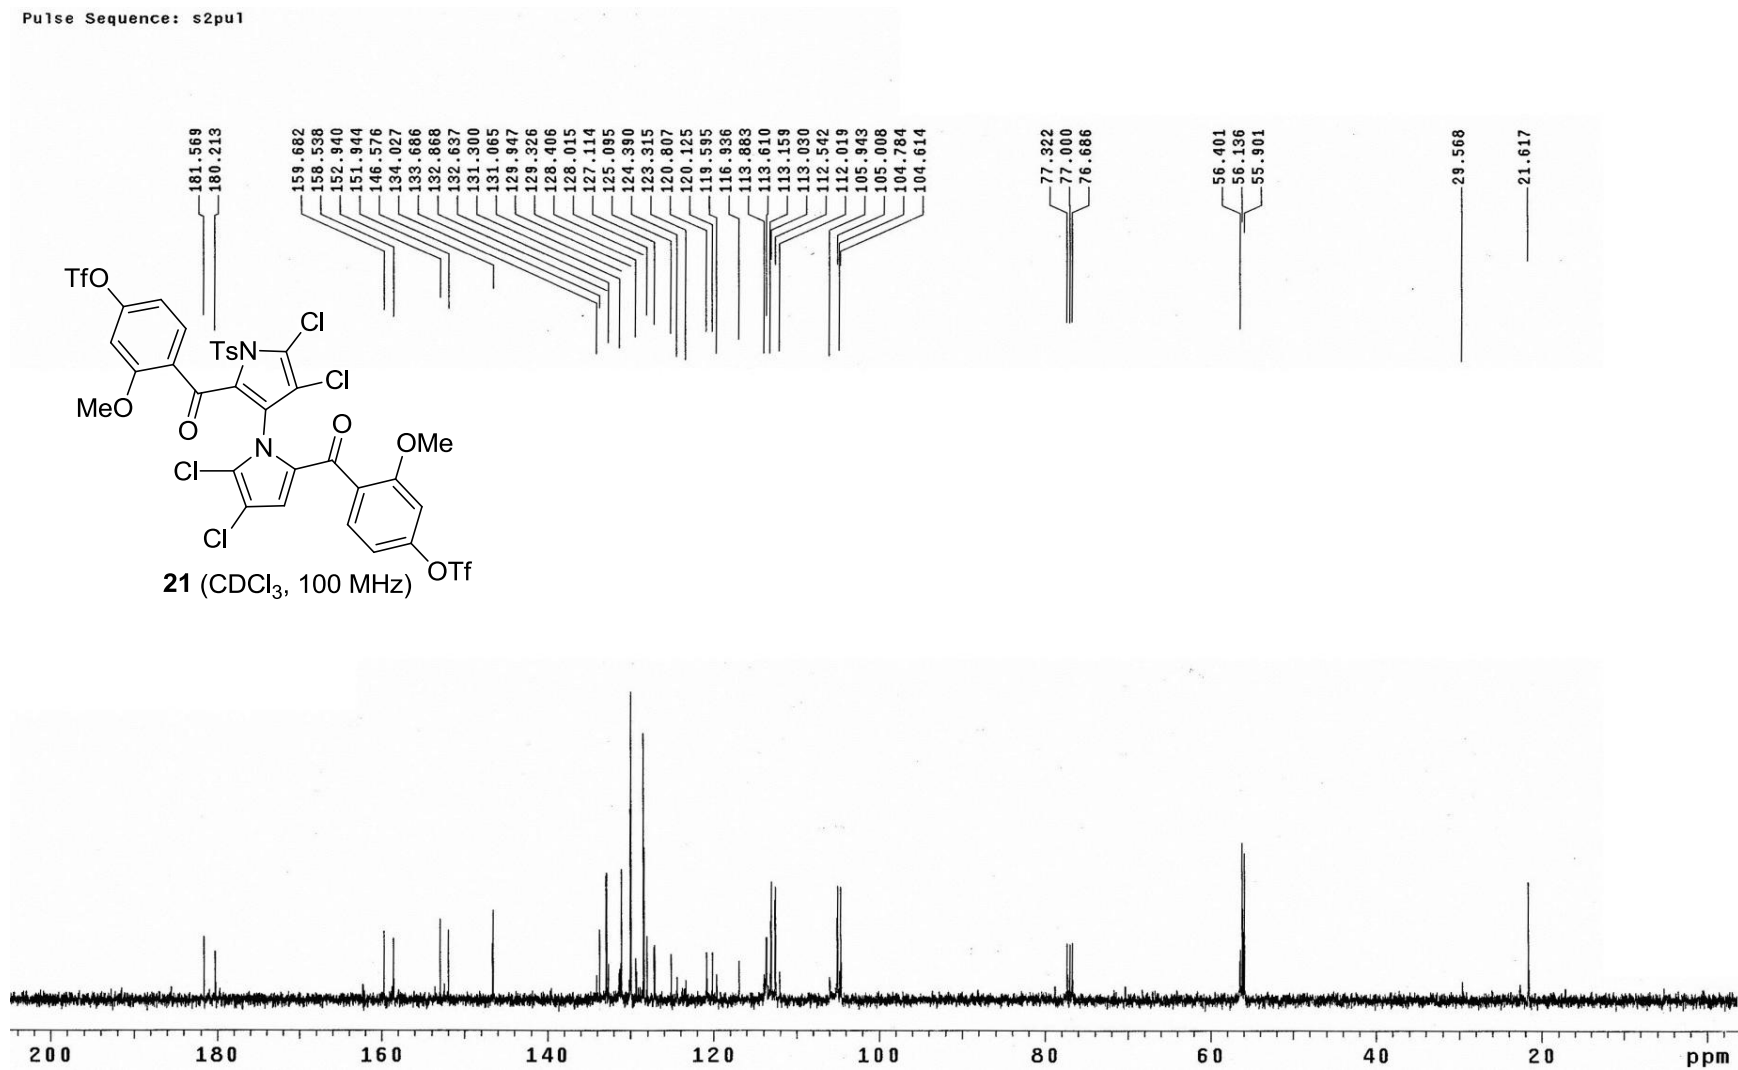

Figure S31.  $^1\text{H}$  NMR spectrum of 22.

CCW119163 H1 CDC13 2011-9-16  
Pulse Sequence: s2pu1

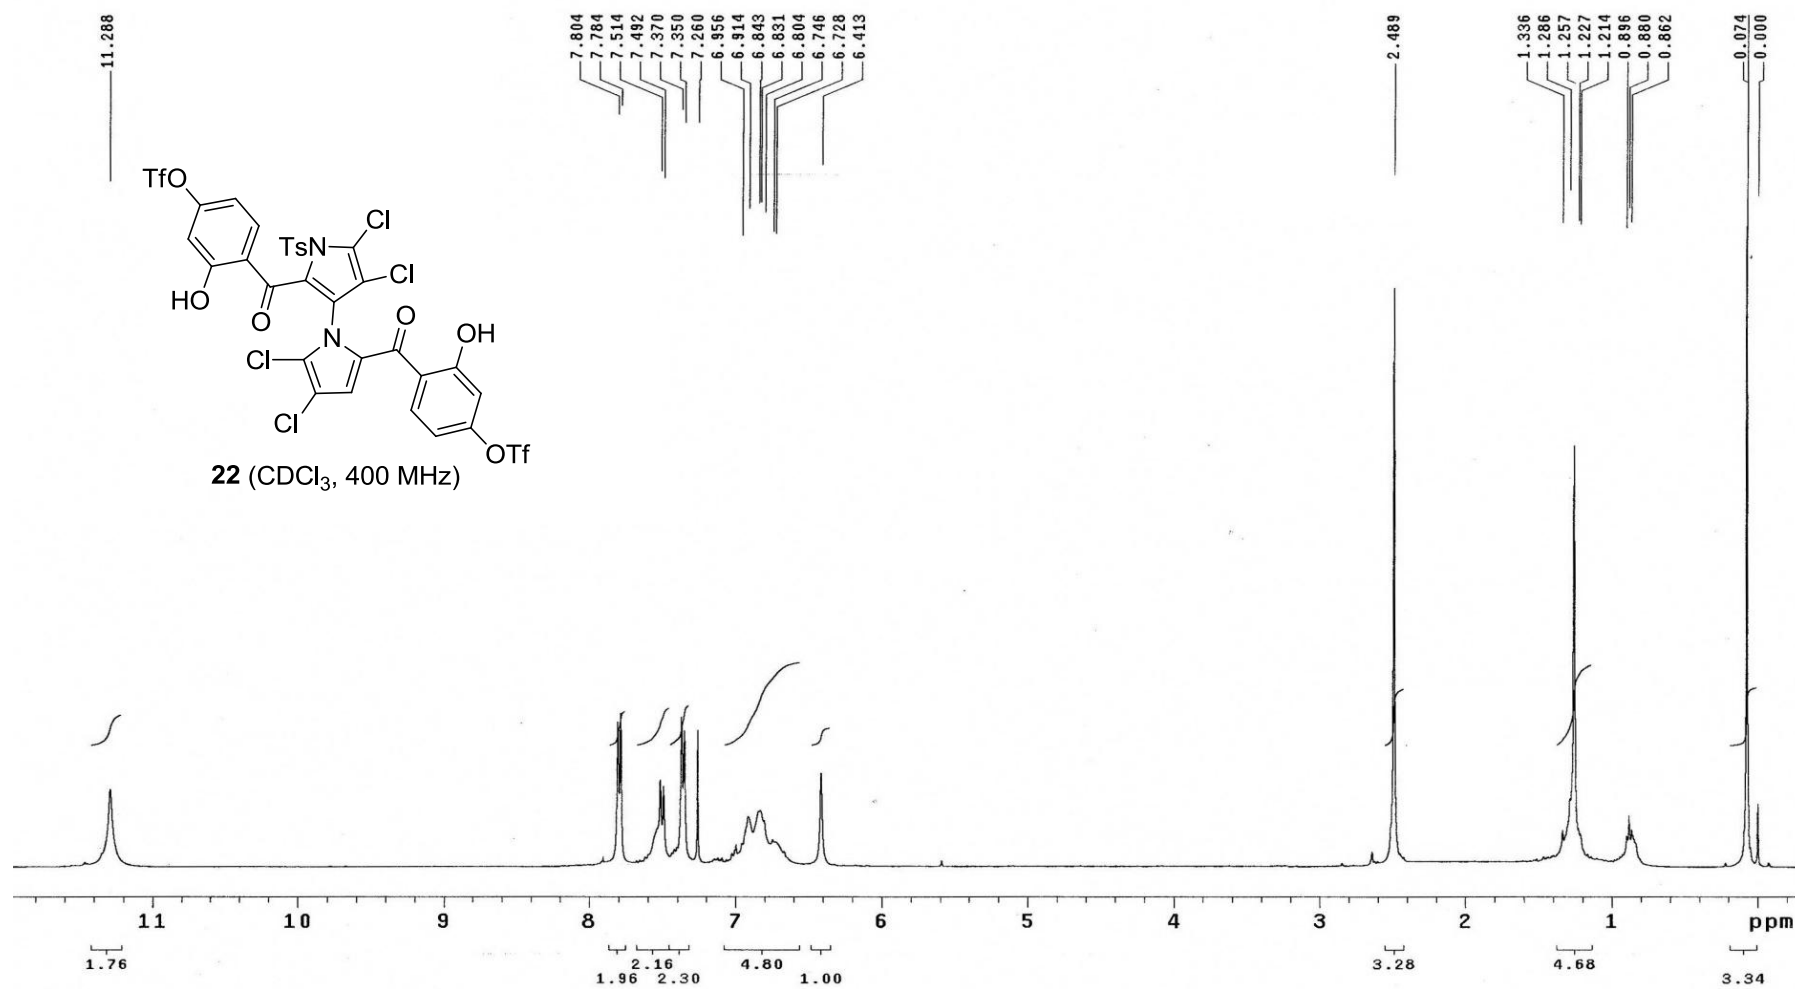

Figure S32.  $^{13}\text{C}$  NMR spectrum of **22**.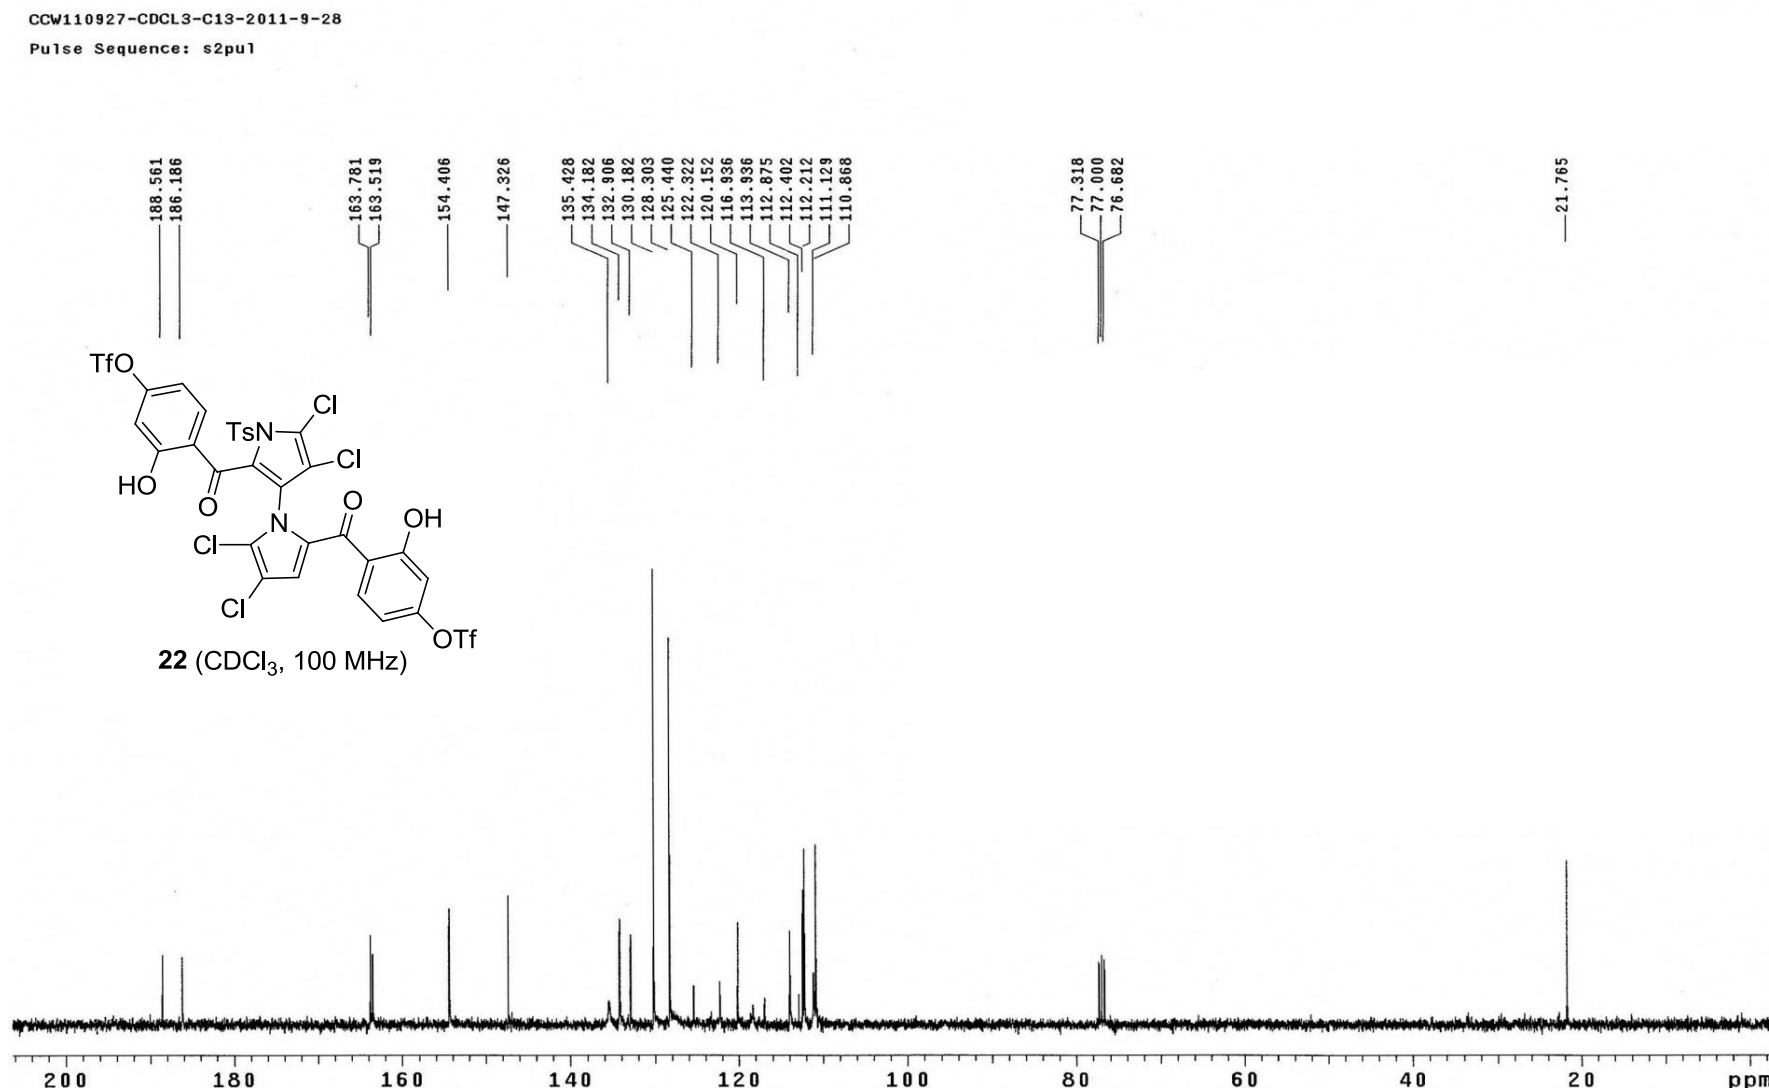



Figure S33.  $^1\text{H}$  NMR spectrum of 23.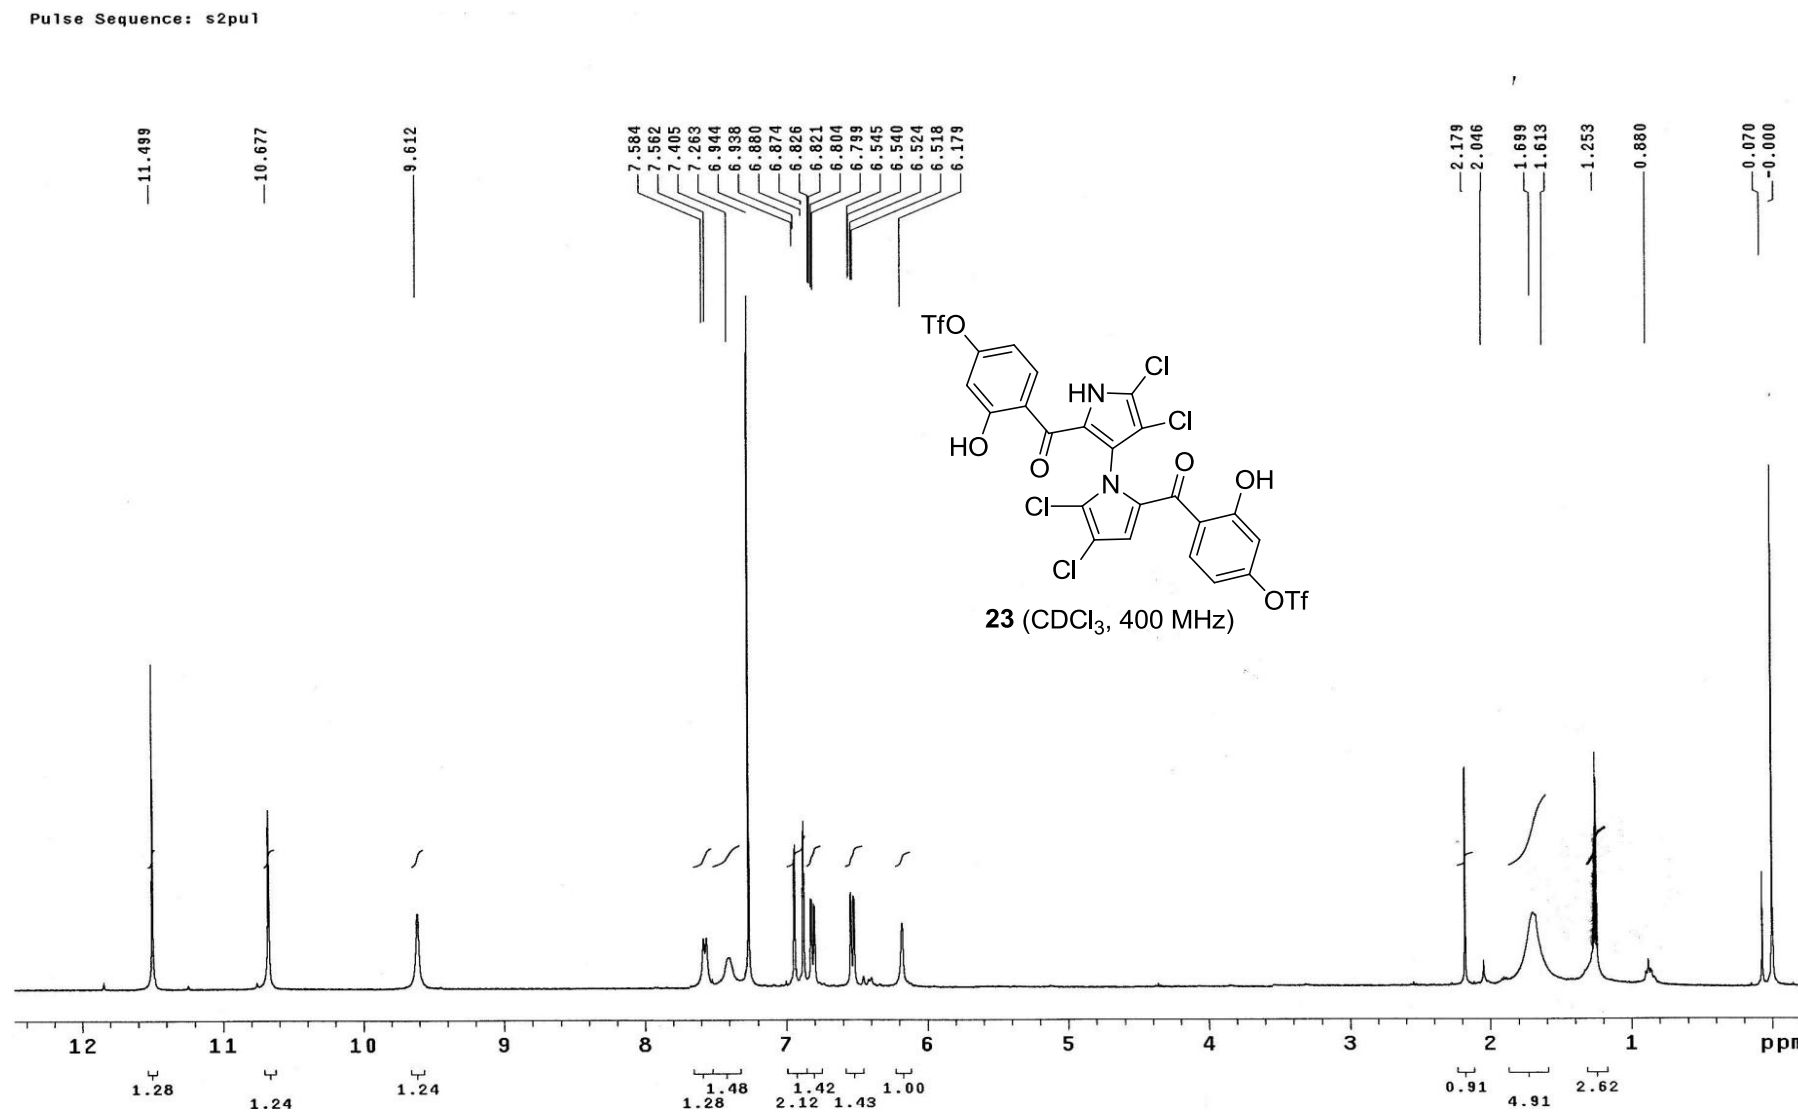

Figure S34.  $^{13}\text{C}$  NMR spectrum of **23**.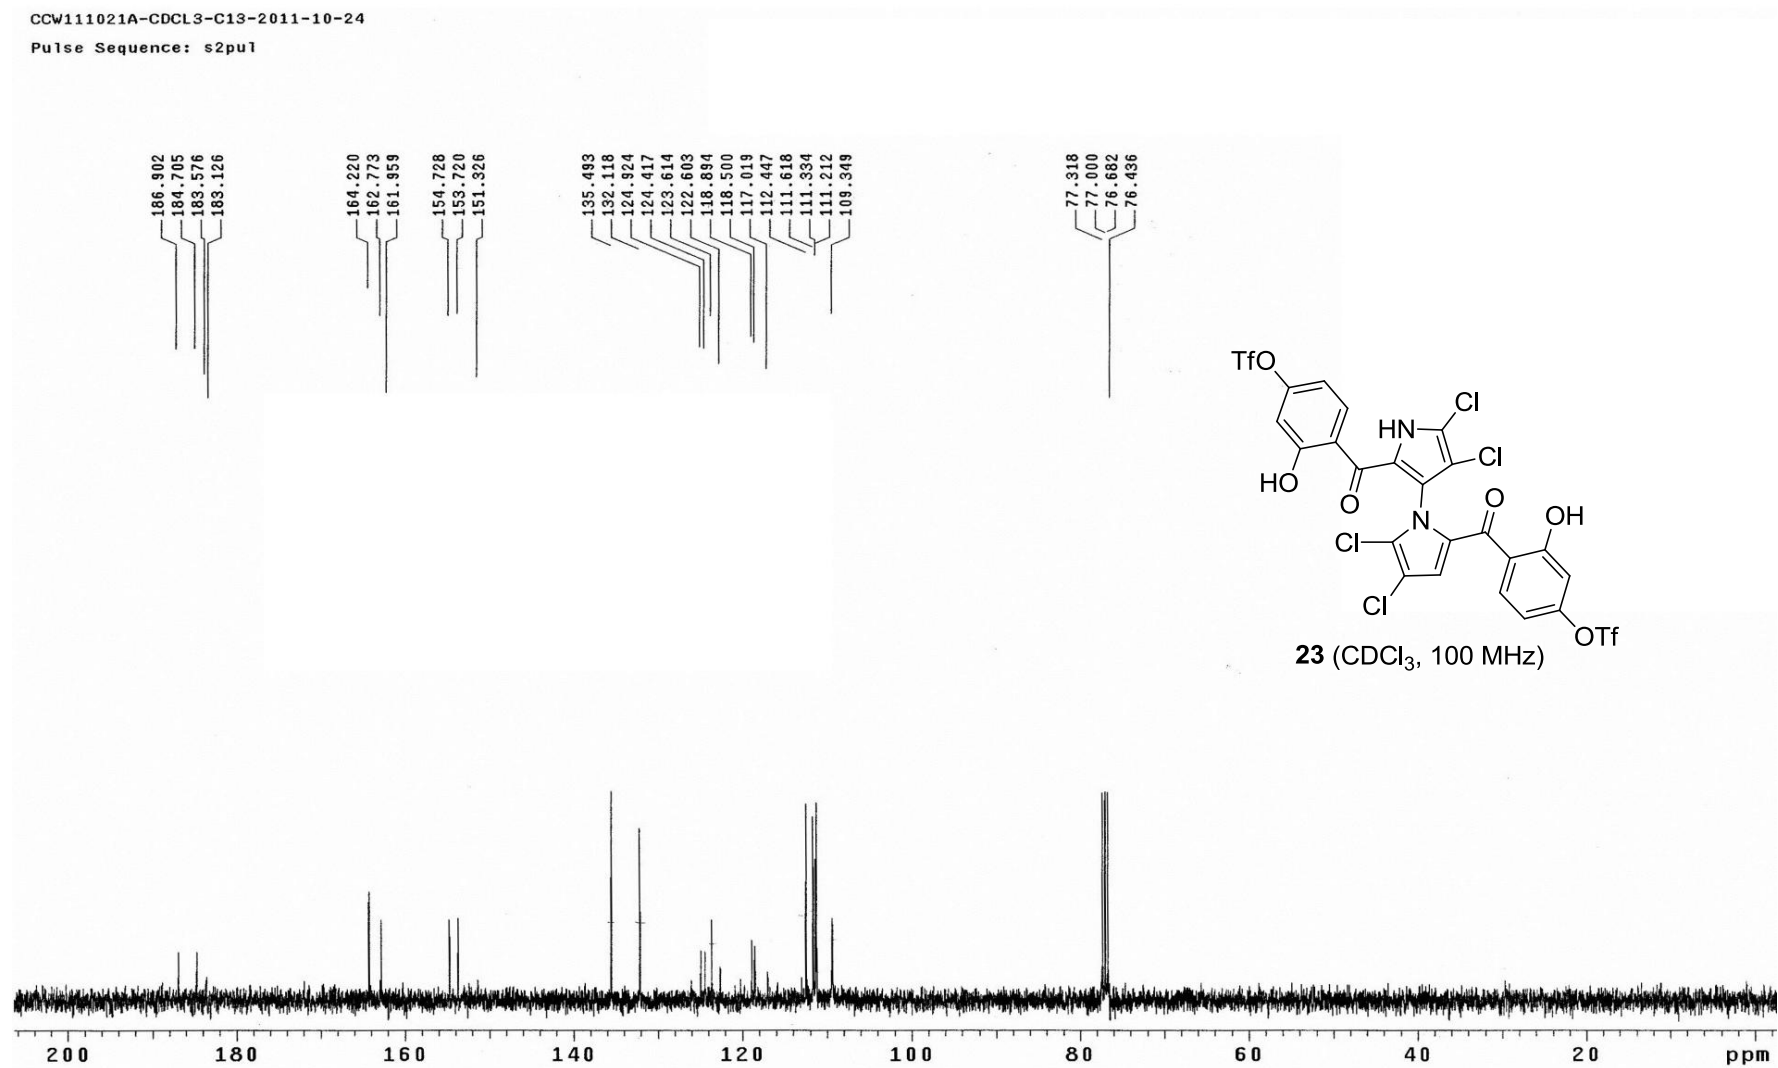

Figure S35.  $^1\text{H}$  NMR spectrum of 24.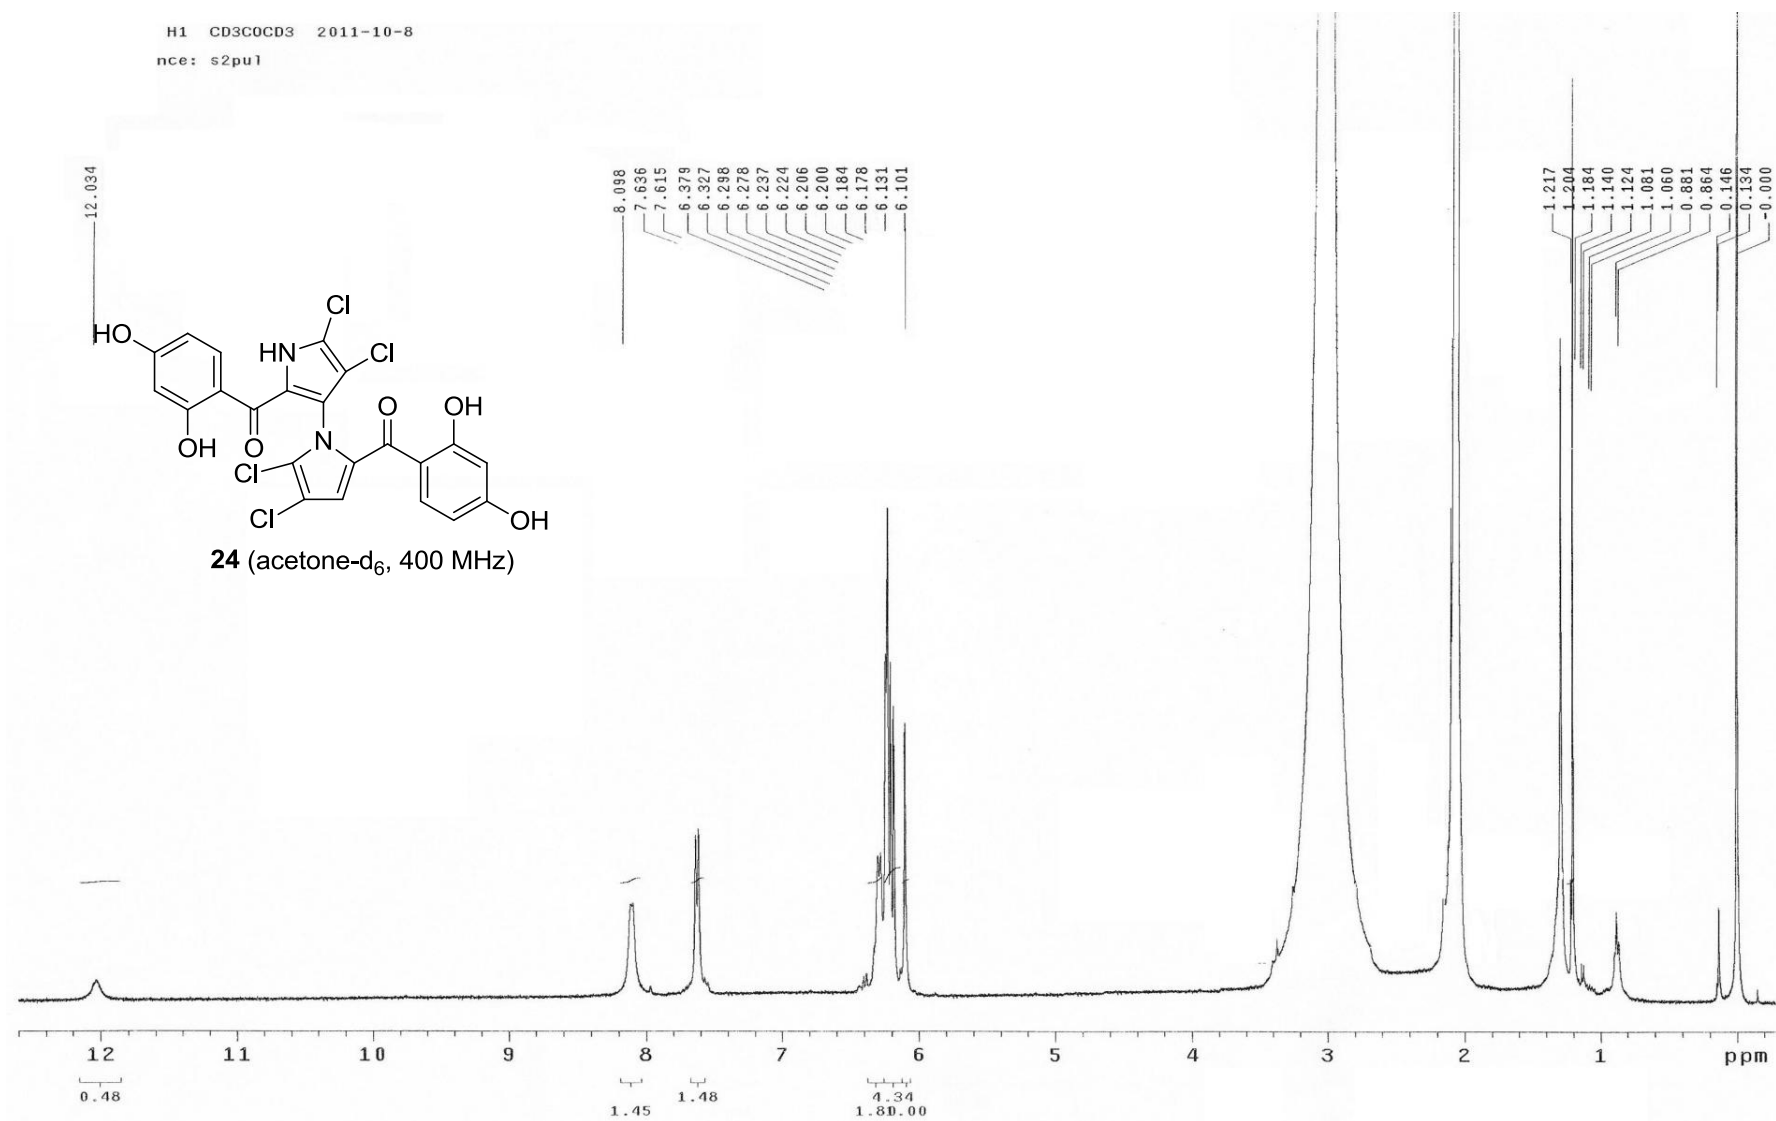

Figure S36.  $^{13}\text{C}$  NMR spectrum of 24.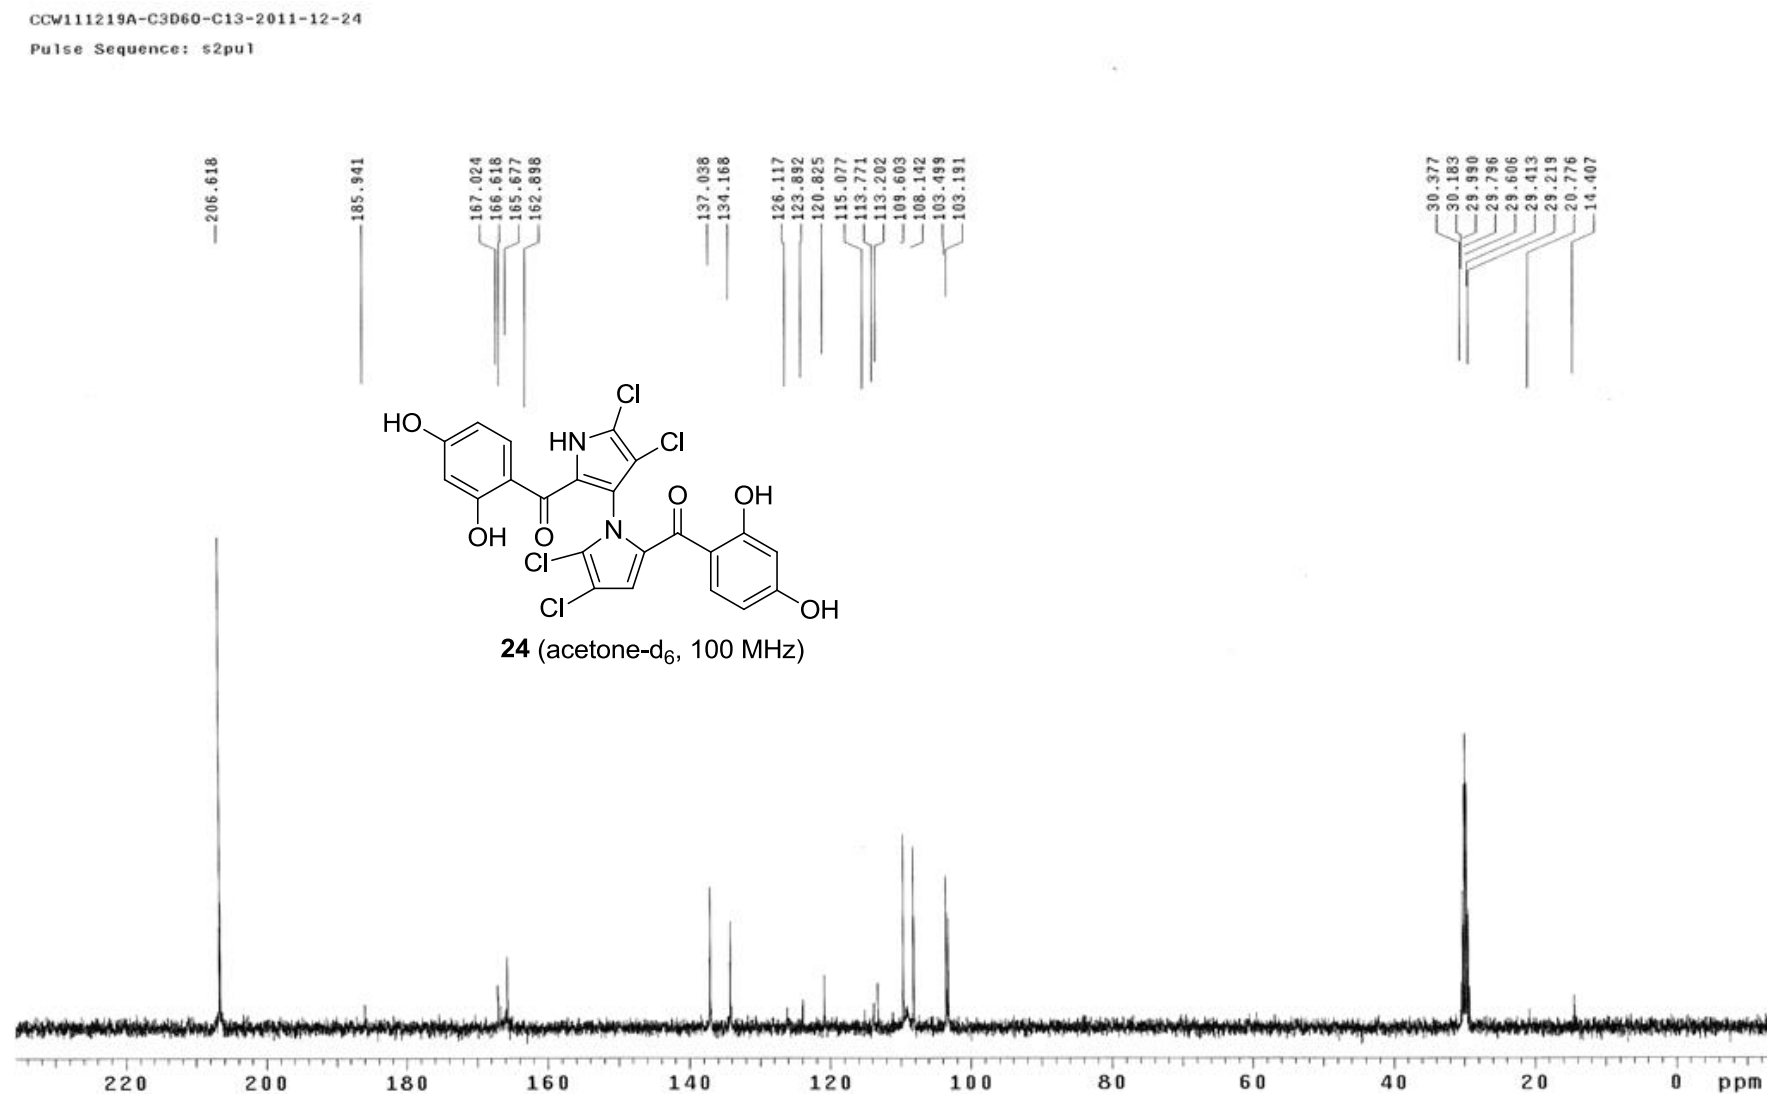

Figure S37.  $^1\text{H}$  NMR spectrum of 25.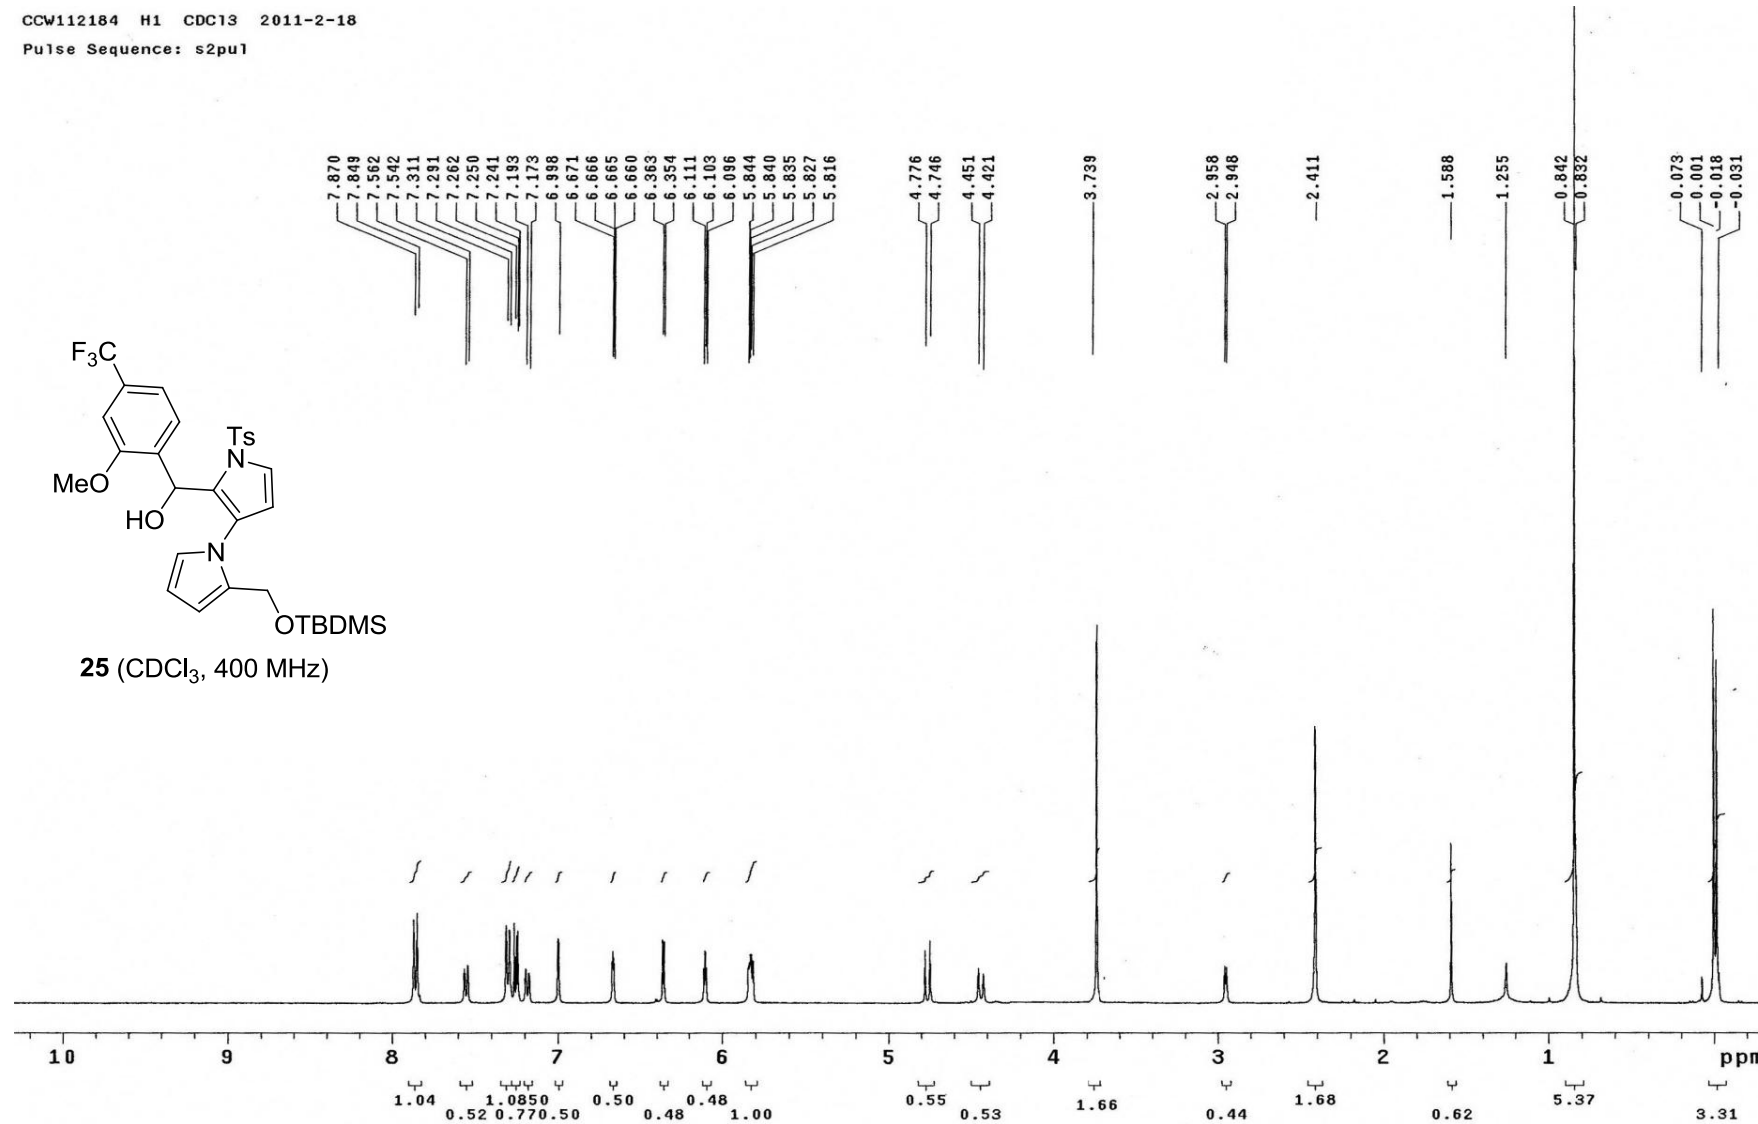

Figure S38.  $^{13}\text{C}$  NMR spectrum of 25.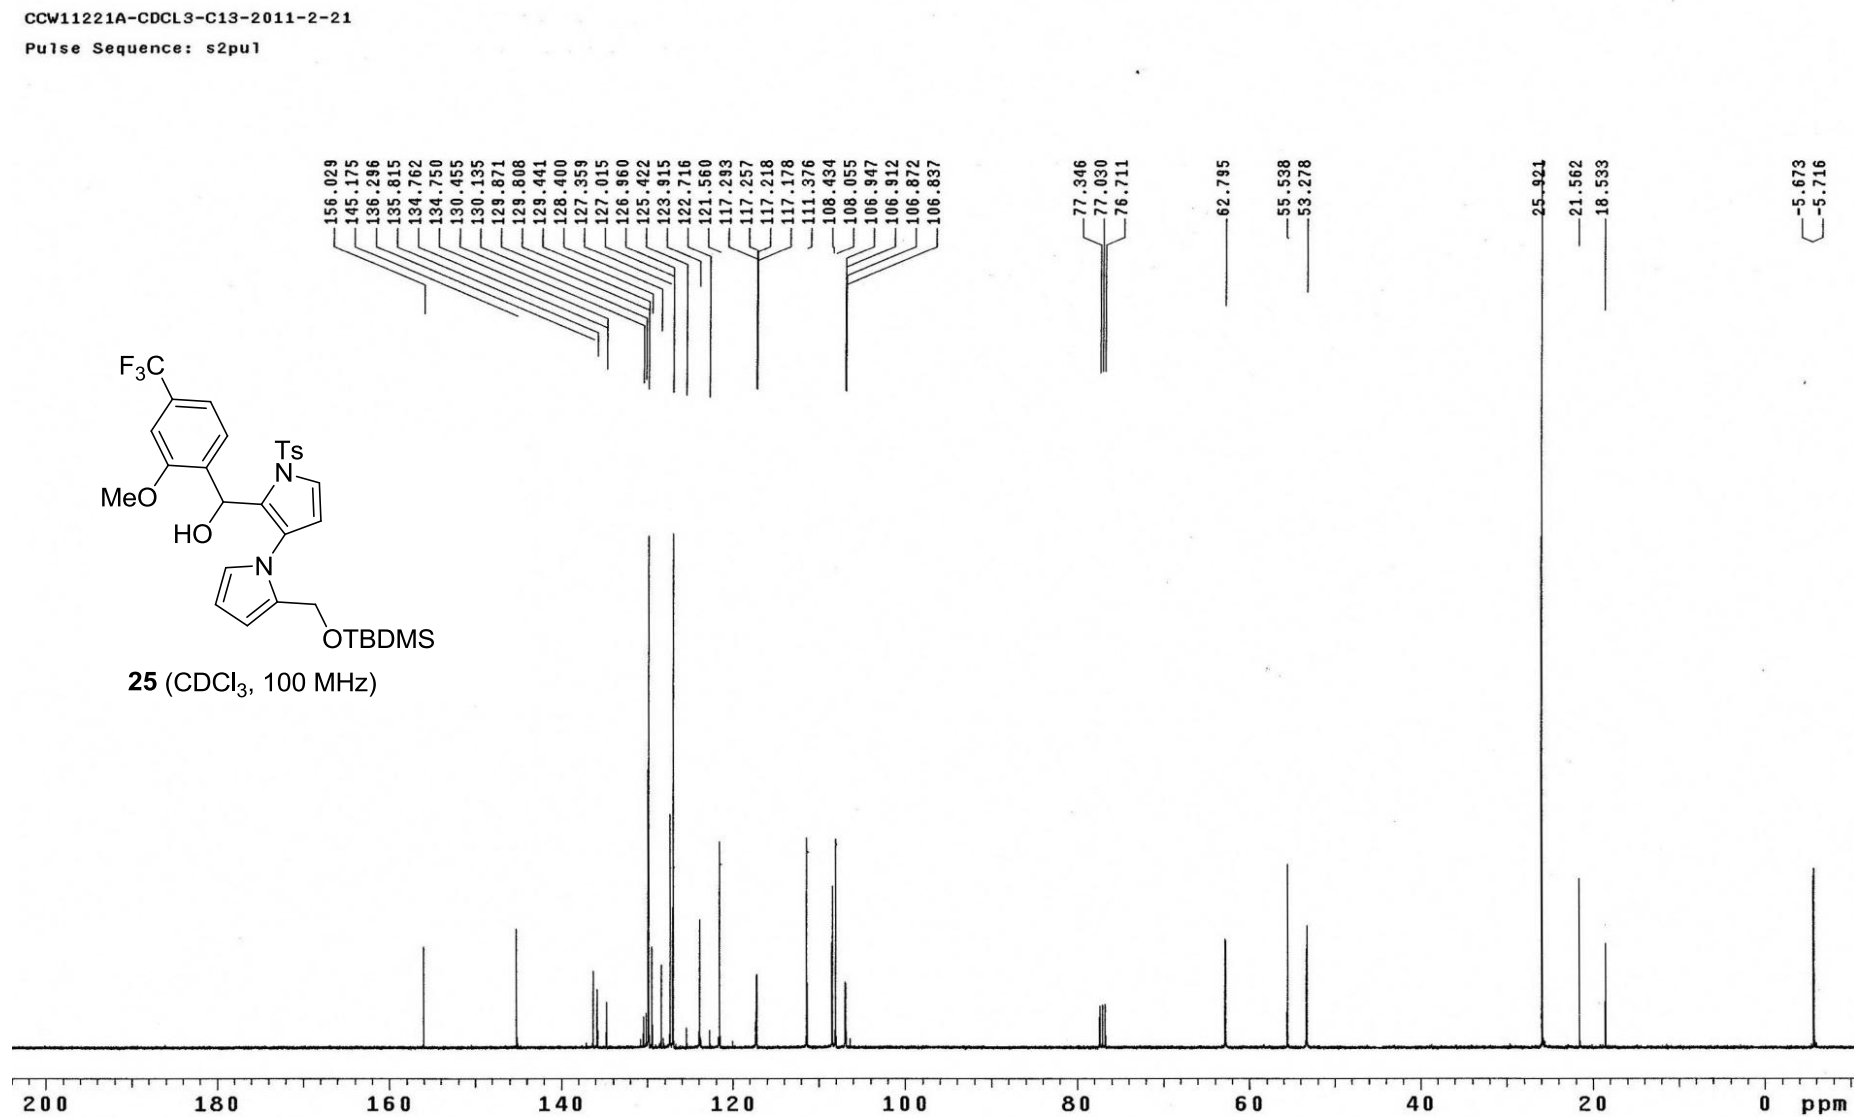

Figure S39.  $^1\text{H}$  NMR spectrum of 26.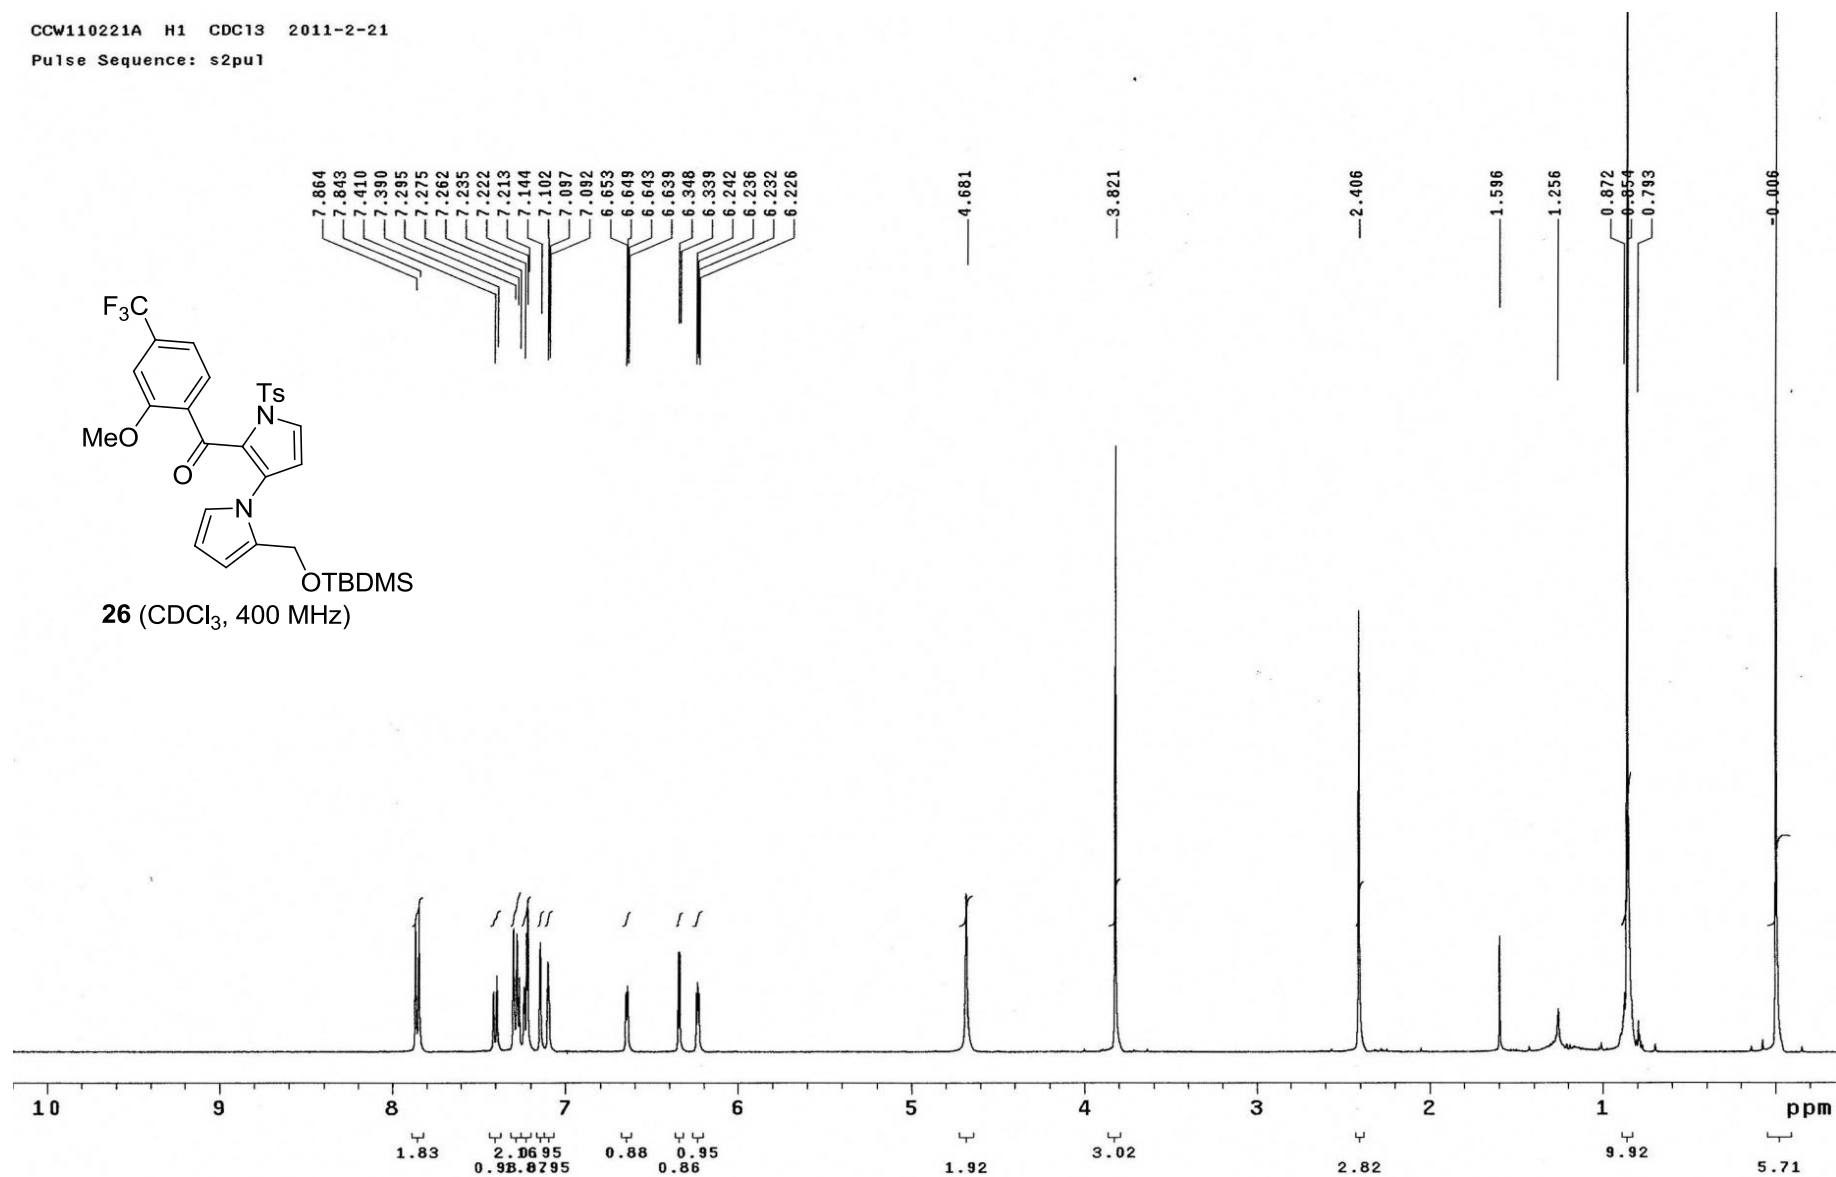

Figure S40.  $^{13}\text{C}$  NMR spectrum of 26.

CCW110222A-CDCL3-C13-2011-2-23

Pulse Sequence: s2pu1

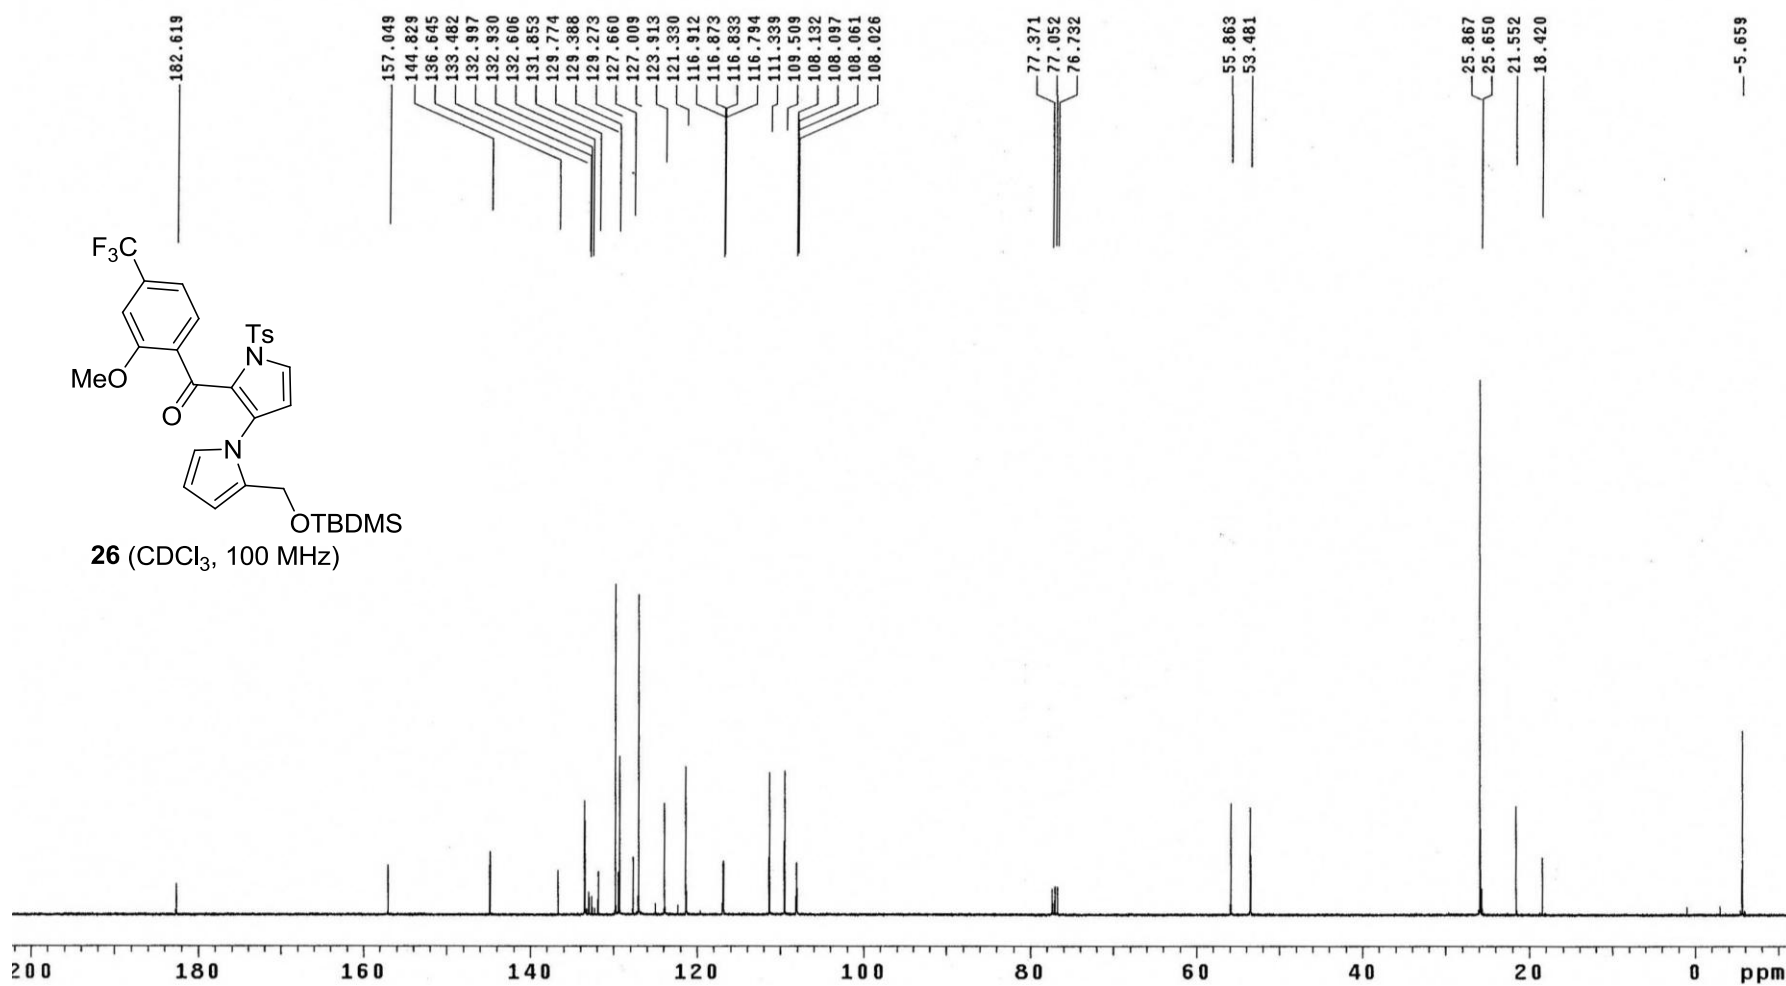



Figure S41.  $^1\text{H}$  NMR spectrum of 27.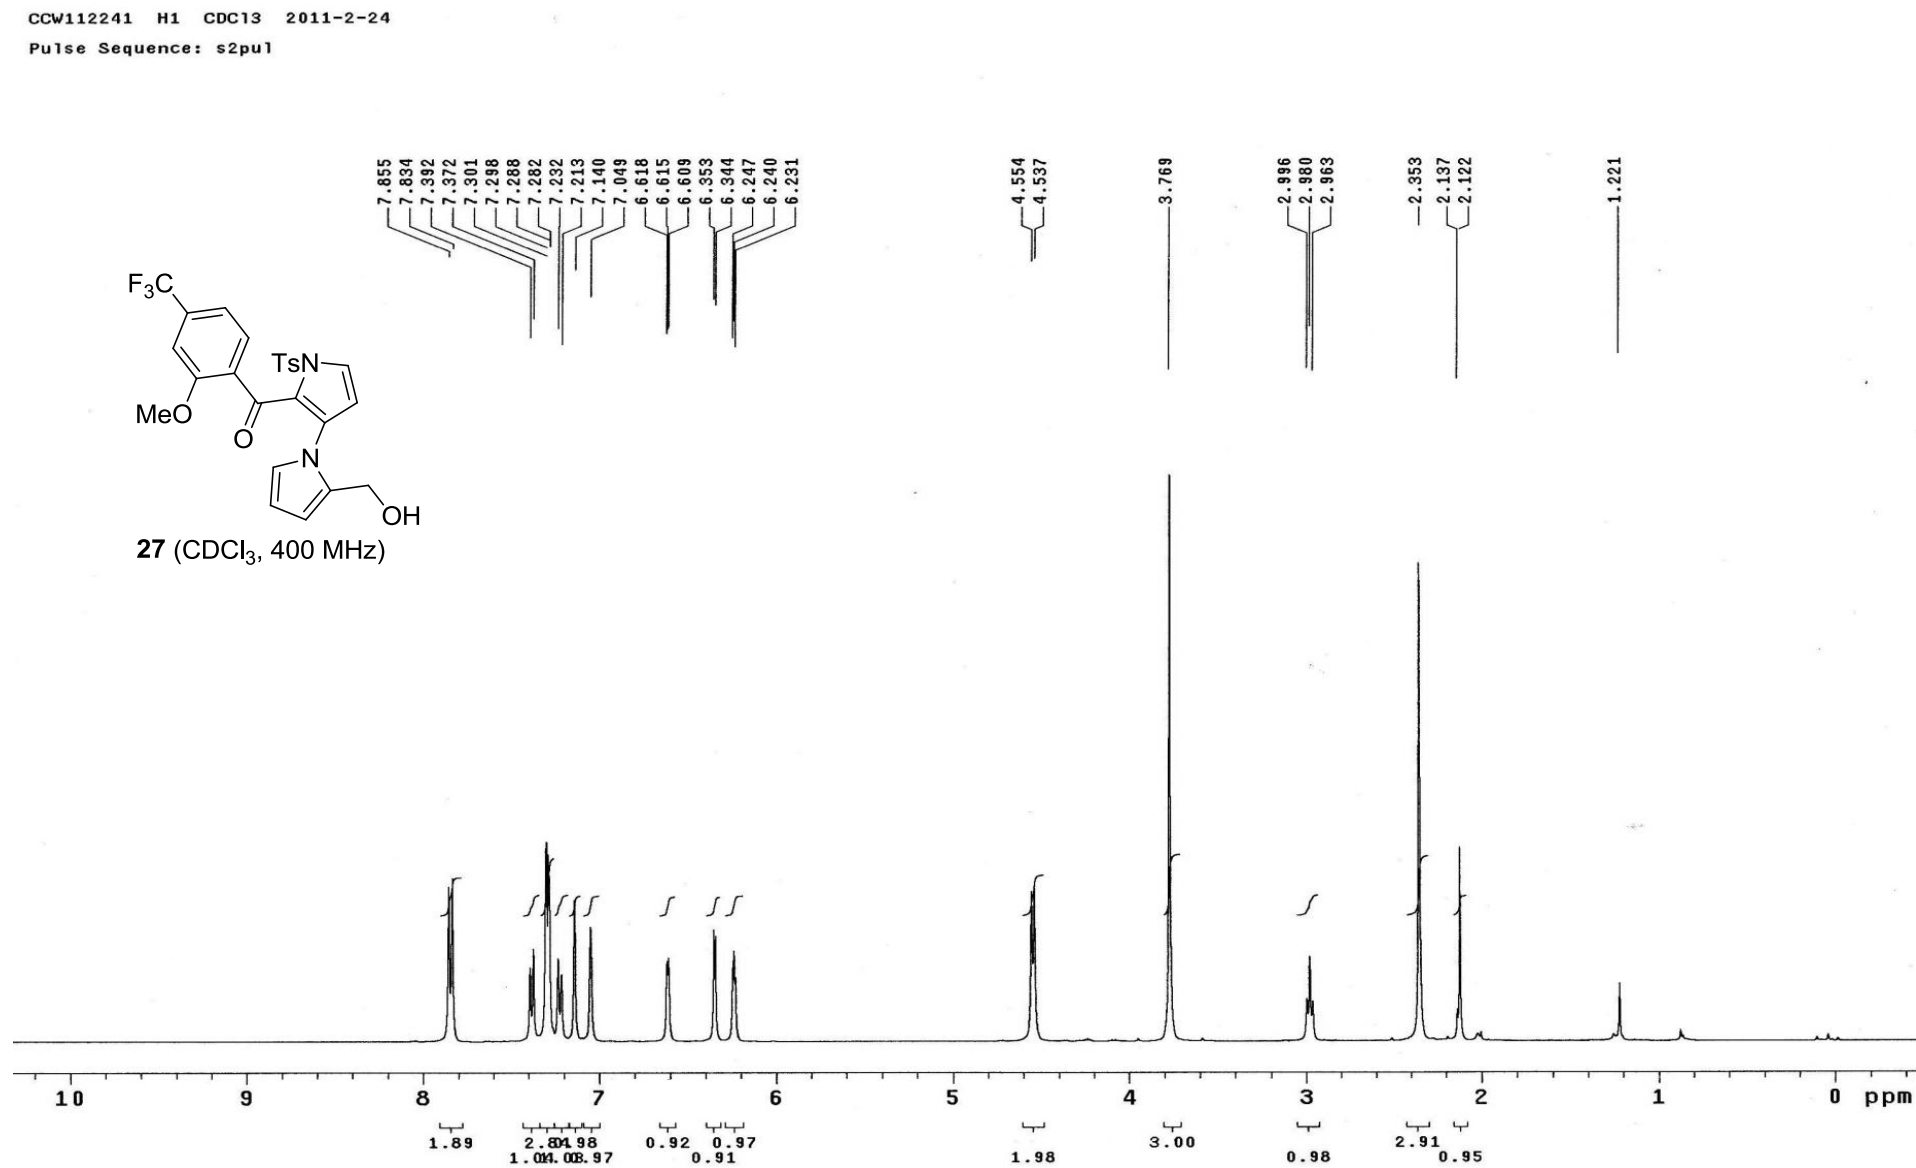

Figure S42.  $^{13}\text{C}$  NMR spectrum of 27.

CCW112241-CDCL3-C13-2011-2-25

Pulse Sequence: s2pu1

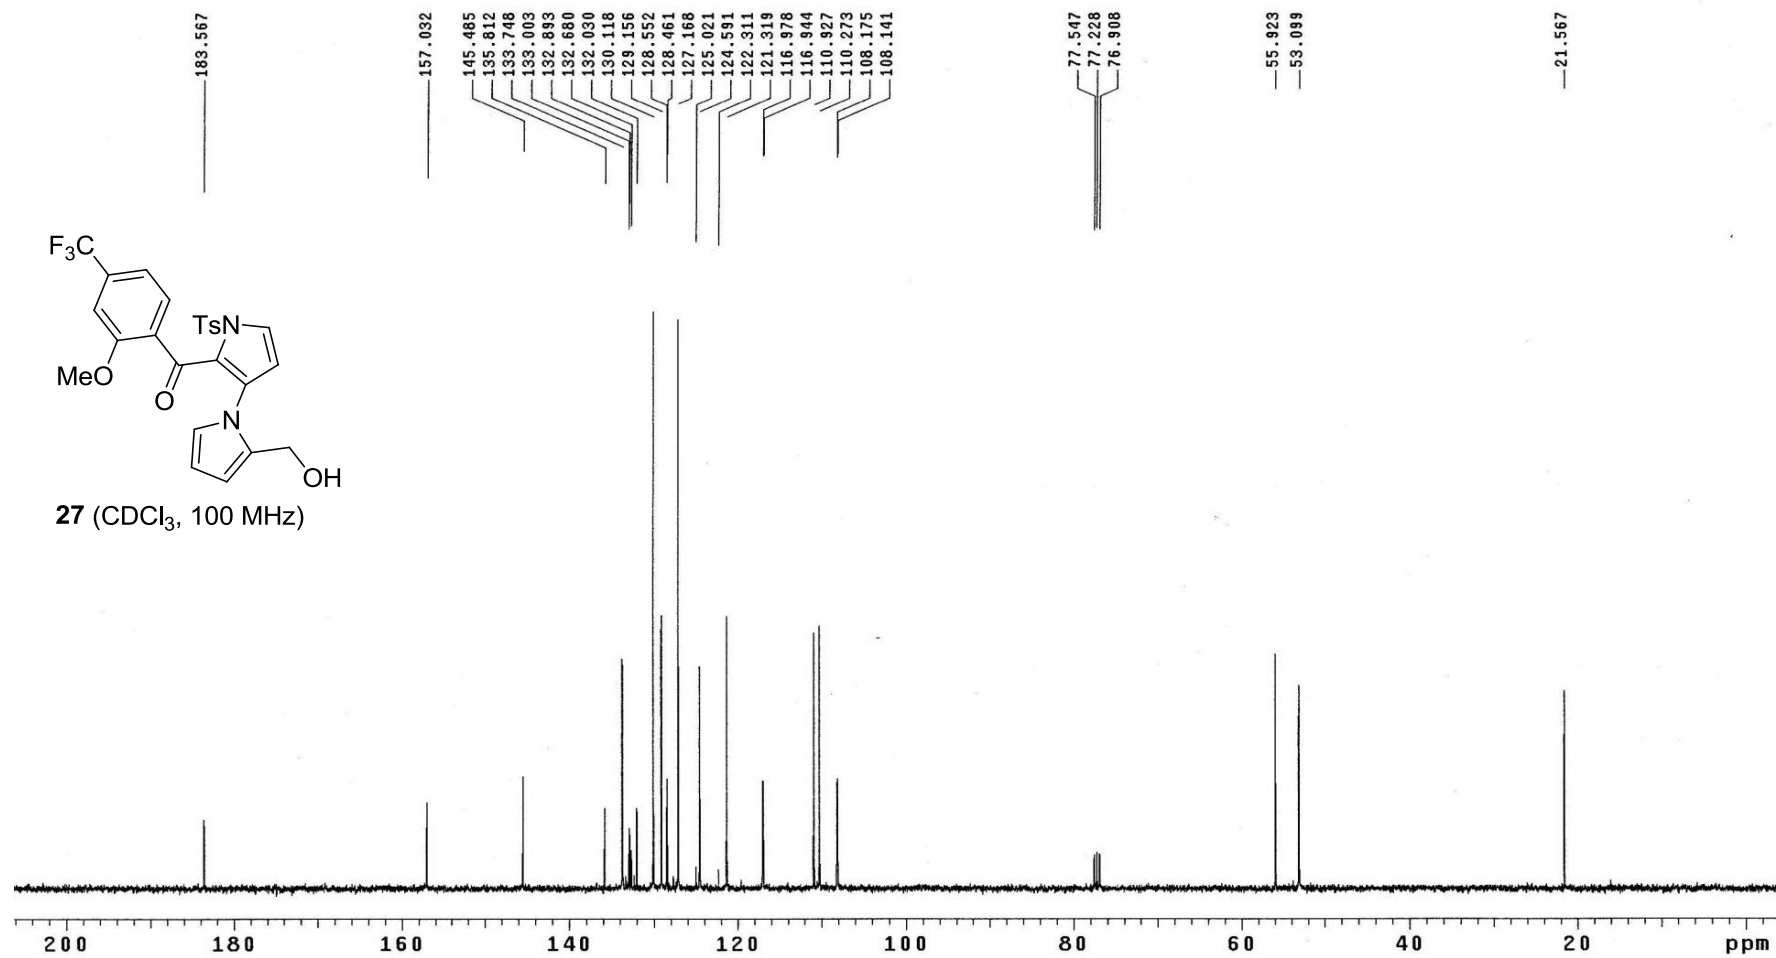

Figure S43.  $^1\text{H}$  NMR spectrum of 28.

CCW107301 H1 CDC13 2010-7-30

Pulse Sequence: s2pu1

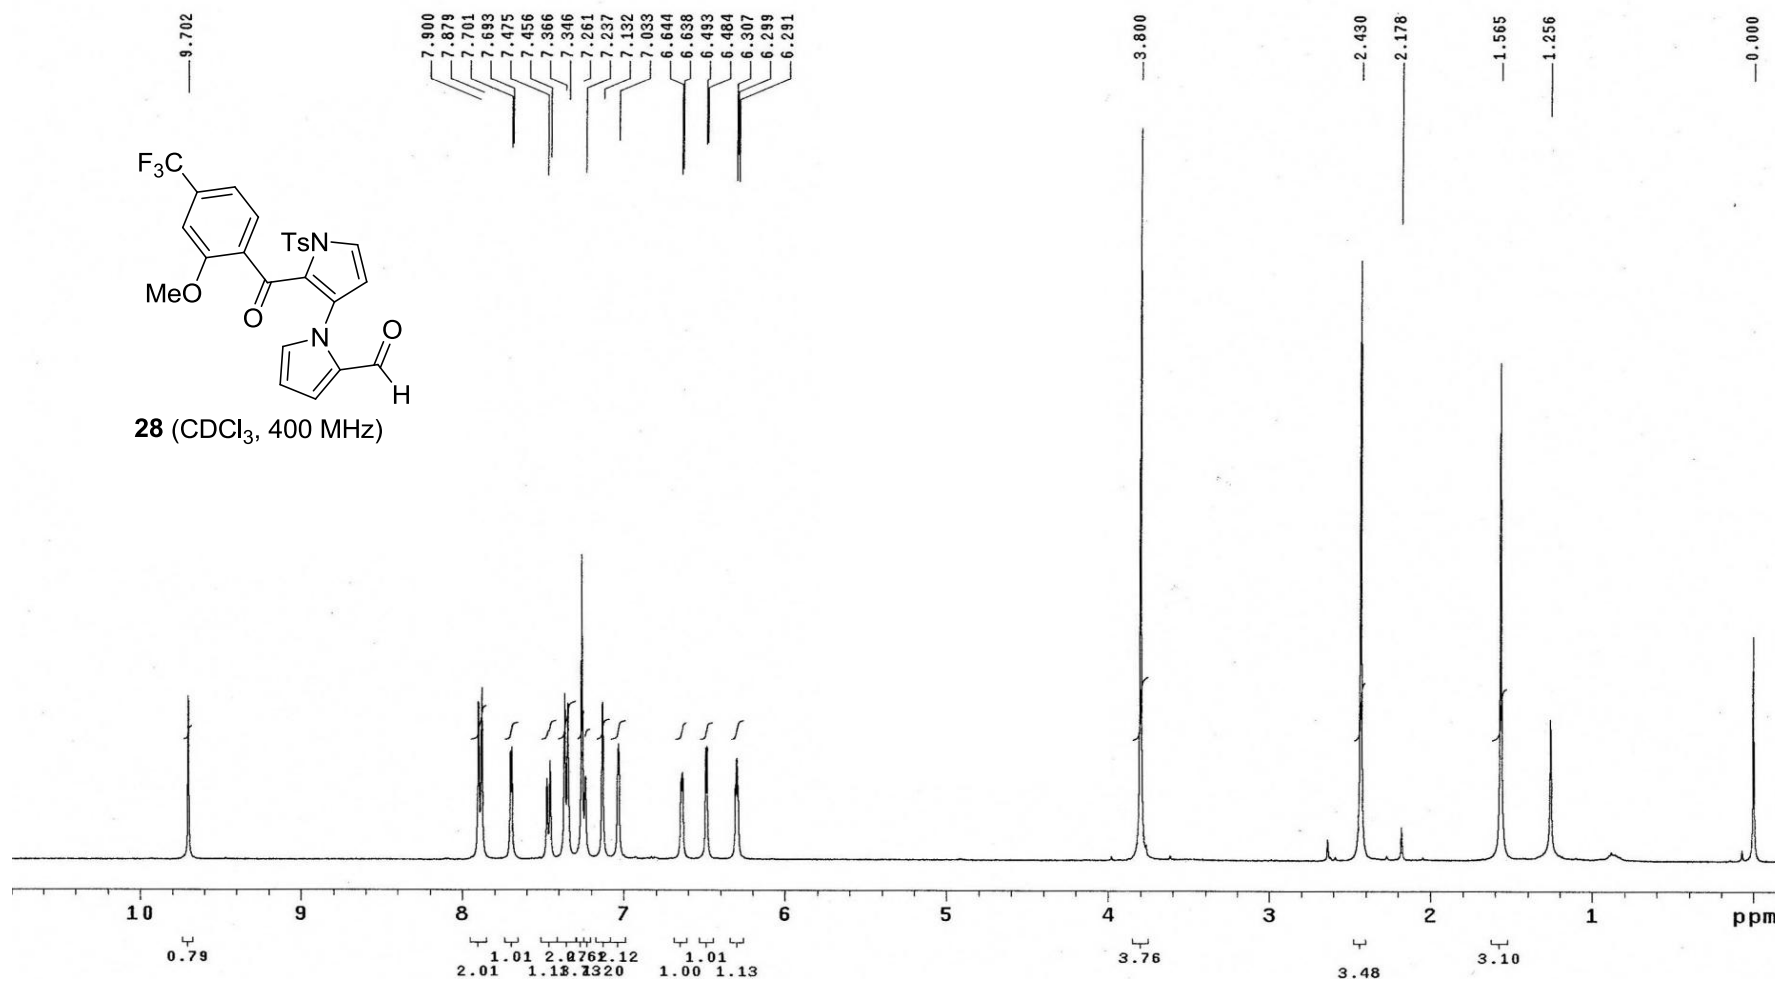

Figure S44.  $^{13}\text{C}$  NMR spectrum of 28.CCW110228A-CDCl<sub>3</sub>-C13-2011-3-1

Pulse Sequence: s2pu1

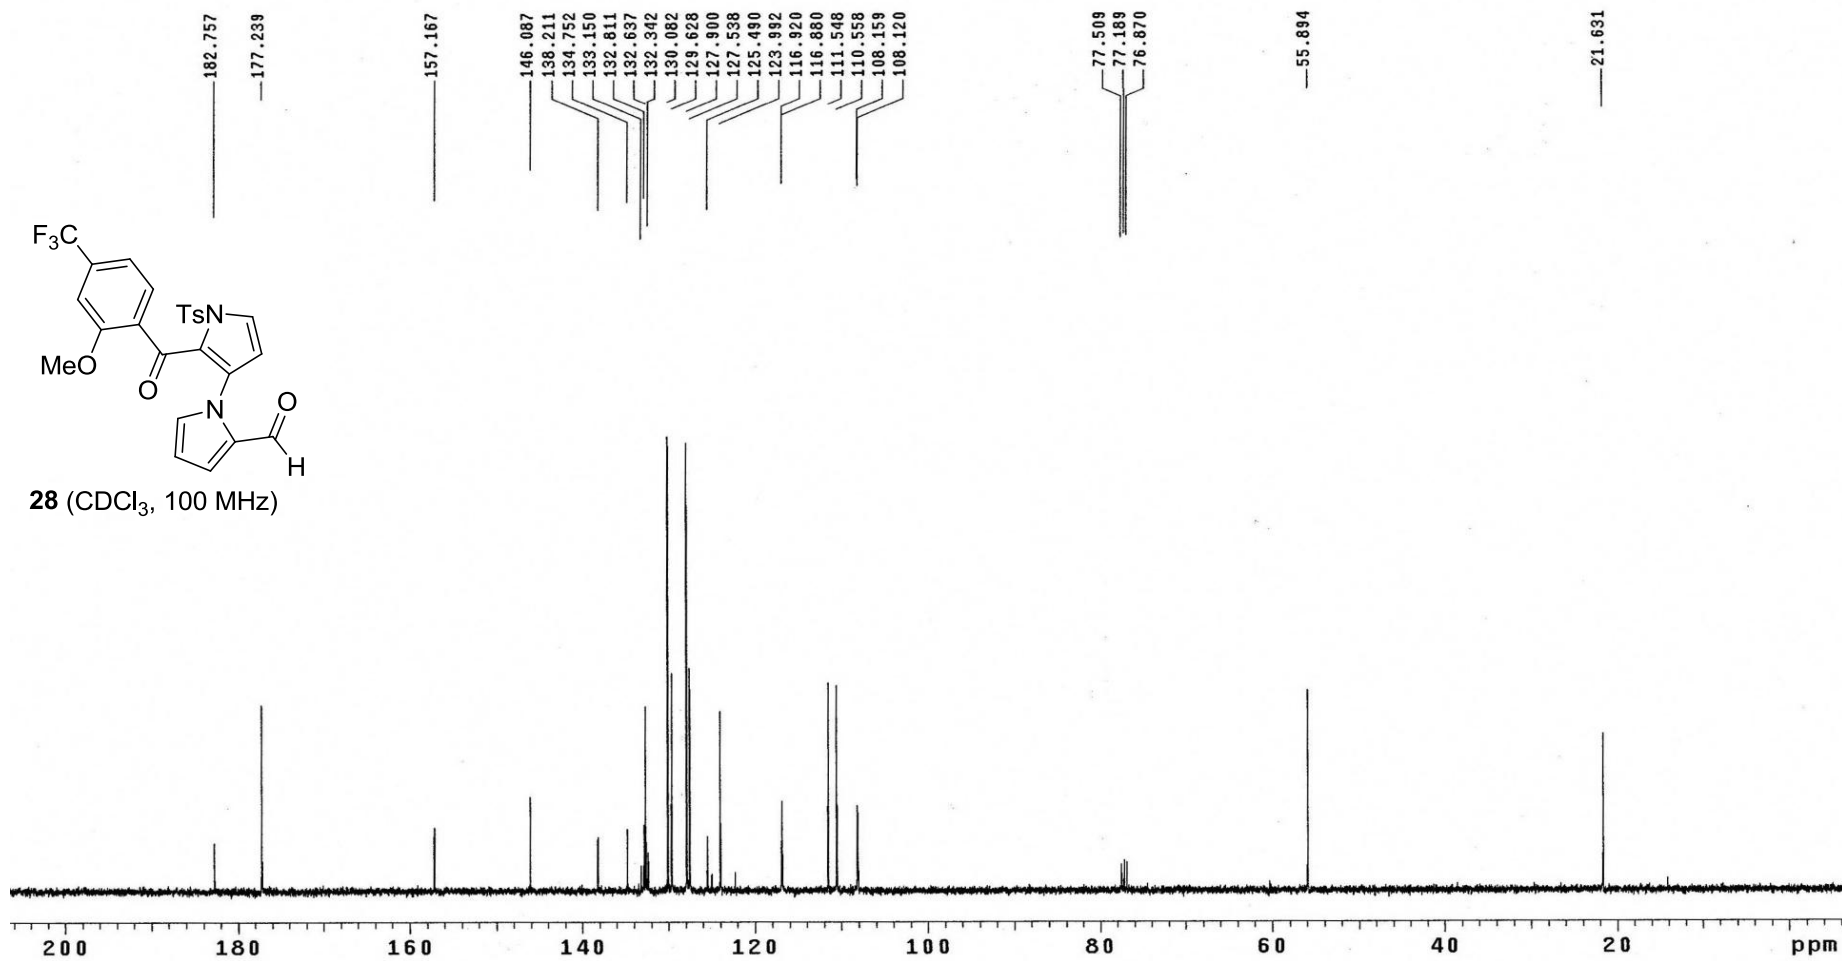

Figure S45.  $^1\text{H}$  NMR spectrum of **29**.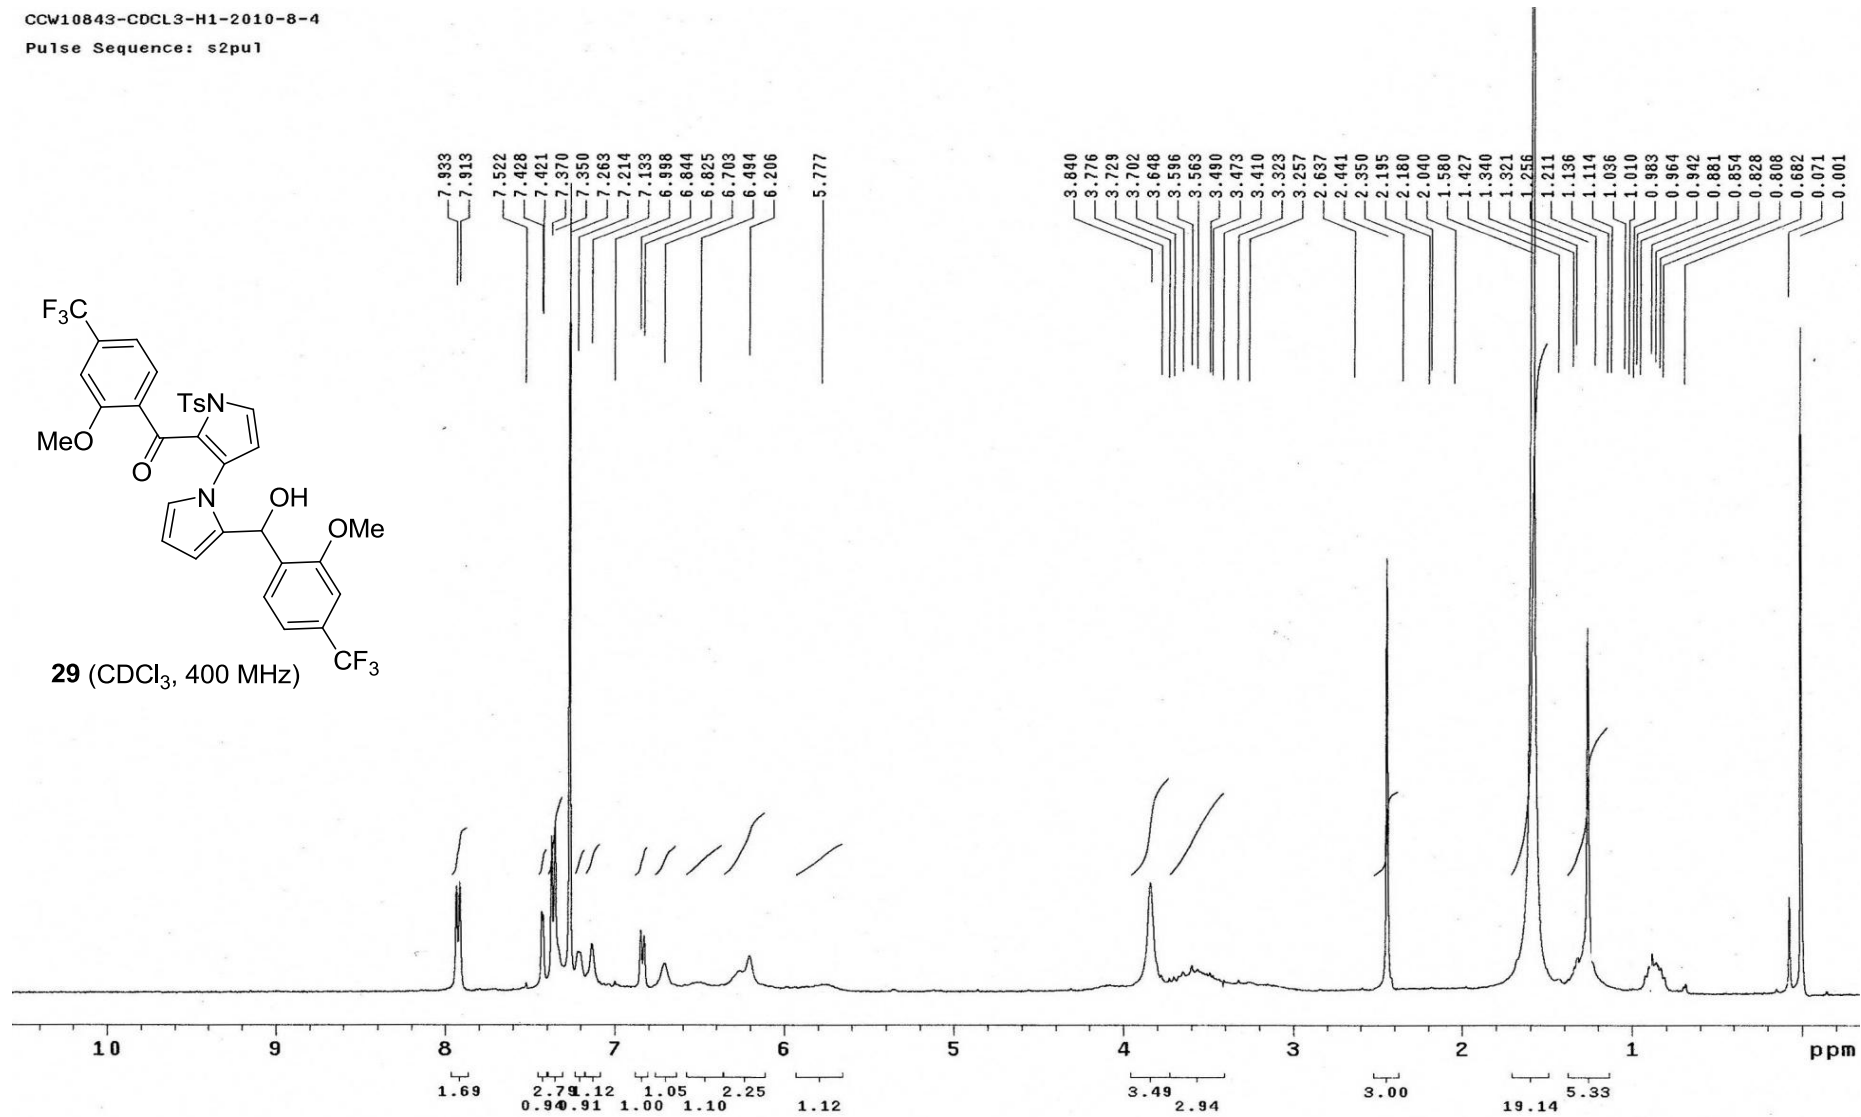

Figure S46.  $^{13}\text{C}$  NMR spectrum of 29.

CCW11311b-CDCL3-C13-2011-3-12

Pulse Sequence: s2pu1

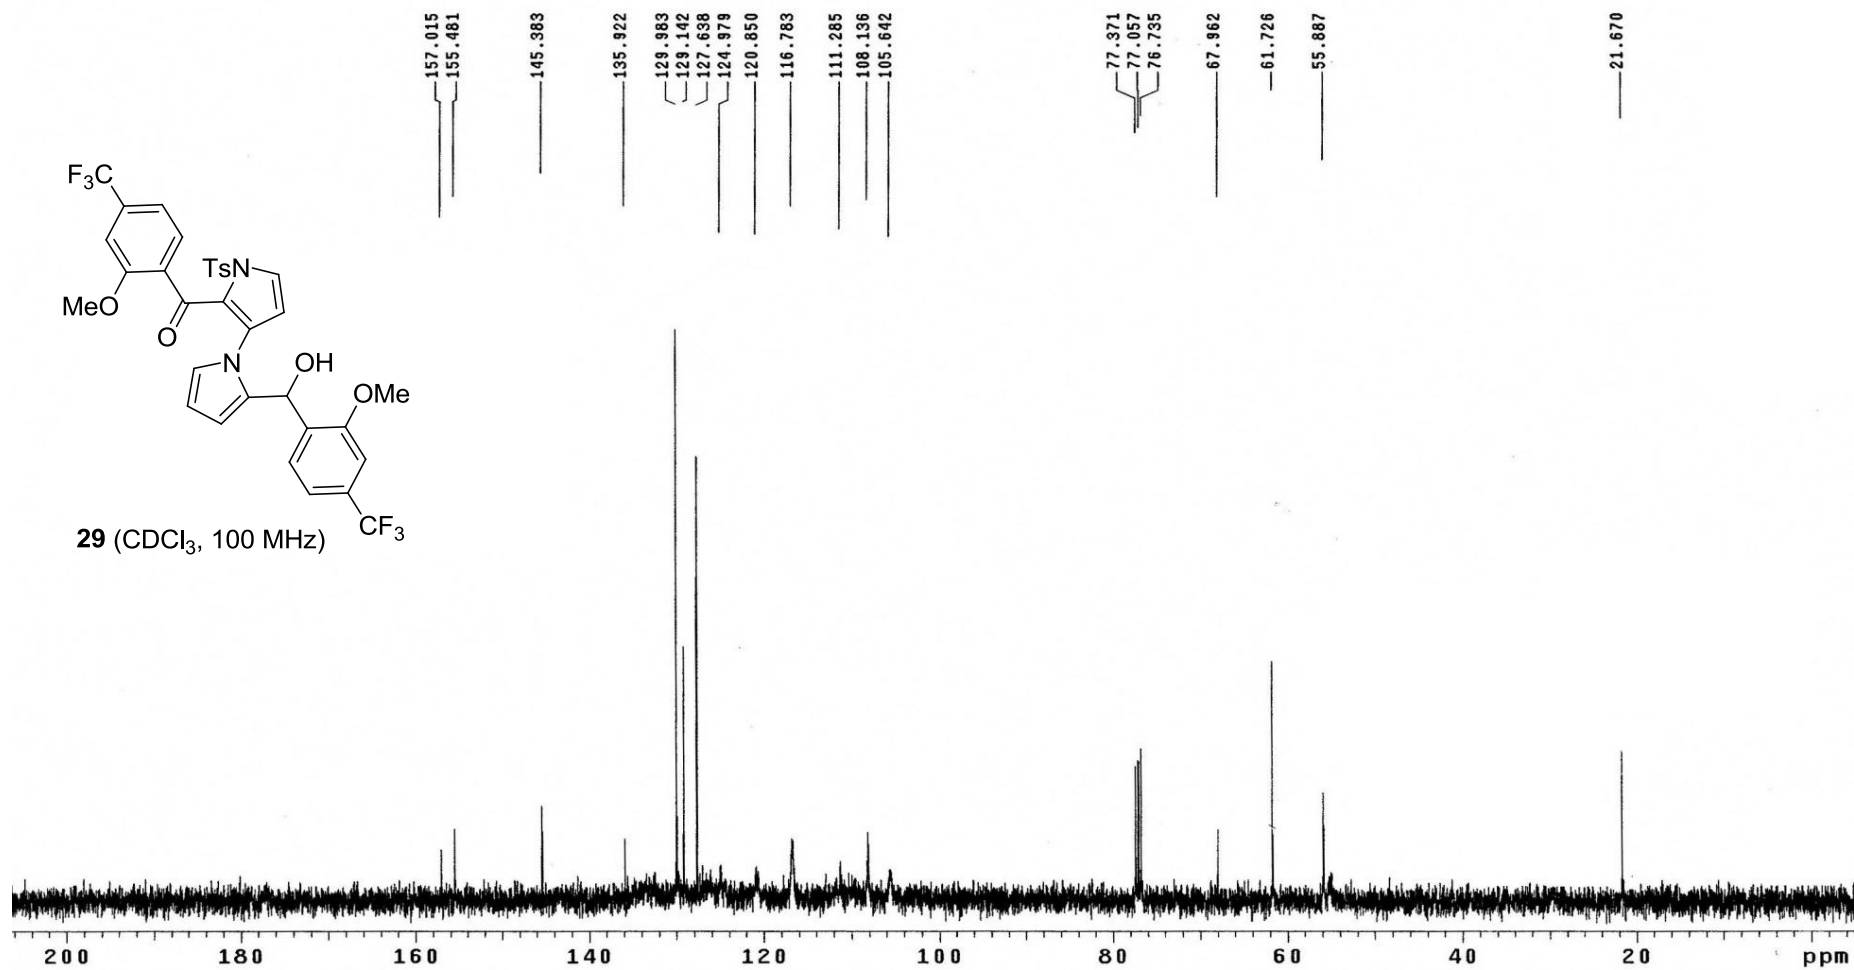

Figure S47.  $^1\text{H}$  NMR spectrum of 29A.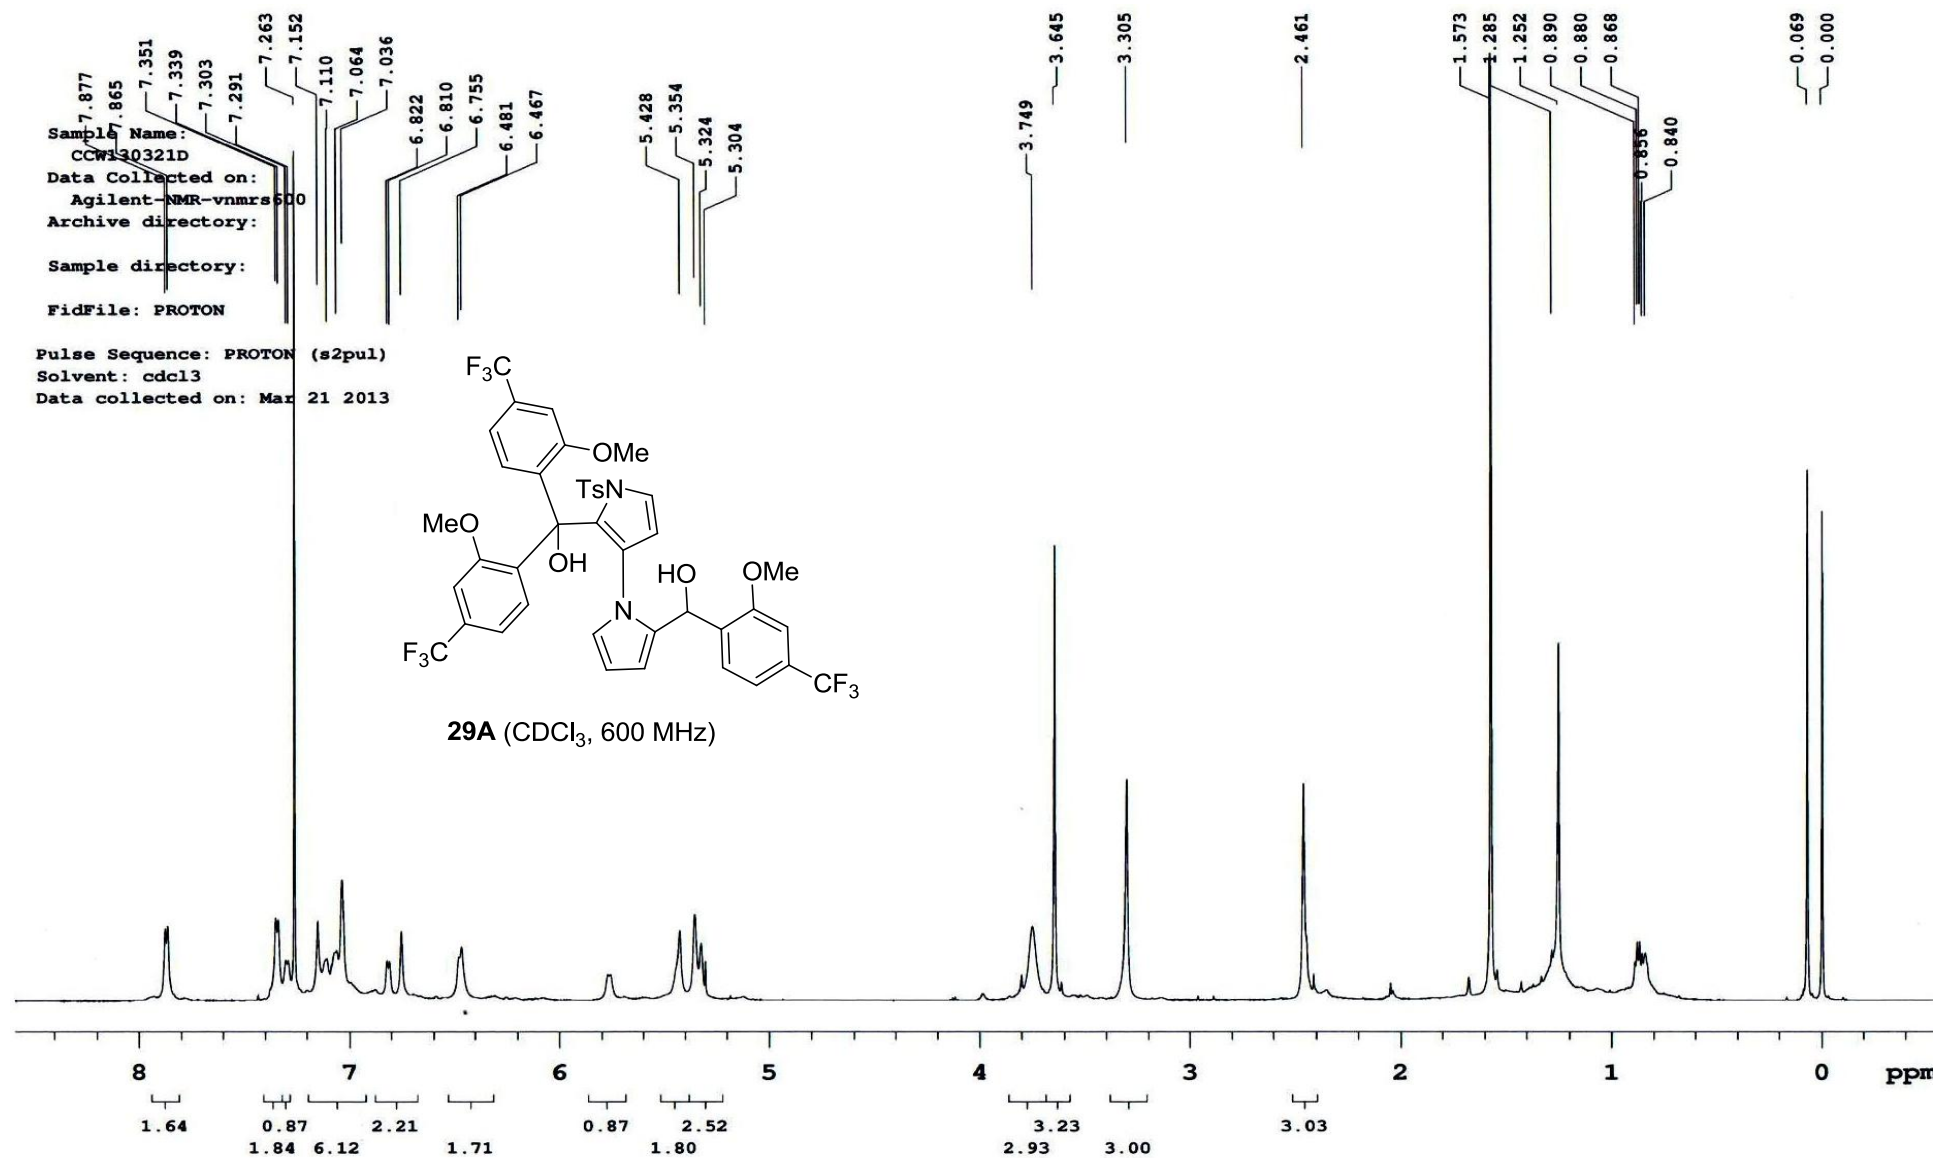

Figure S48.  $^{13}\text{C}$  NMR spectrum of 29A.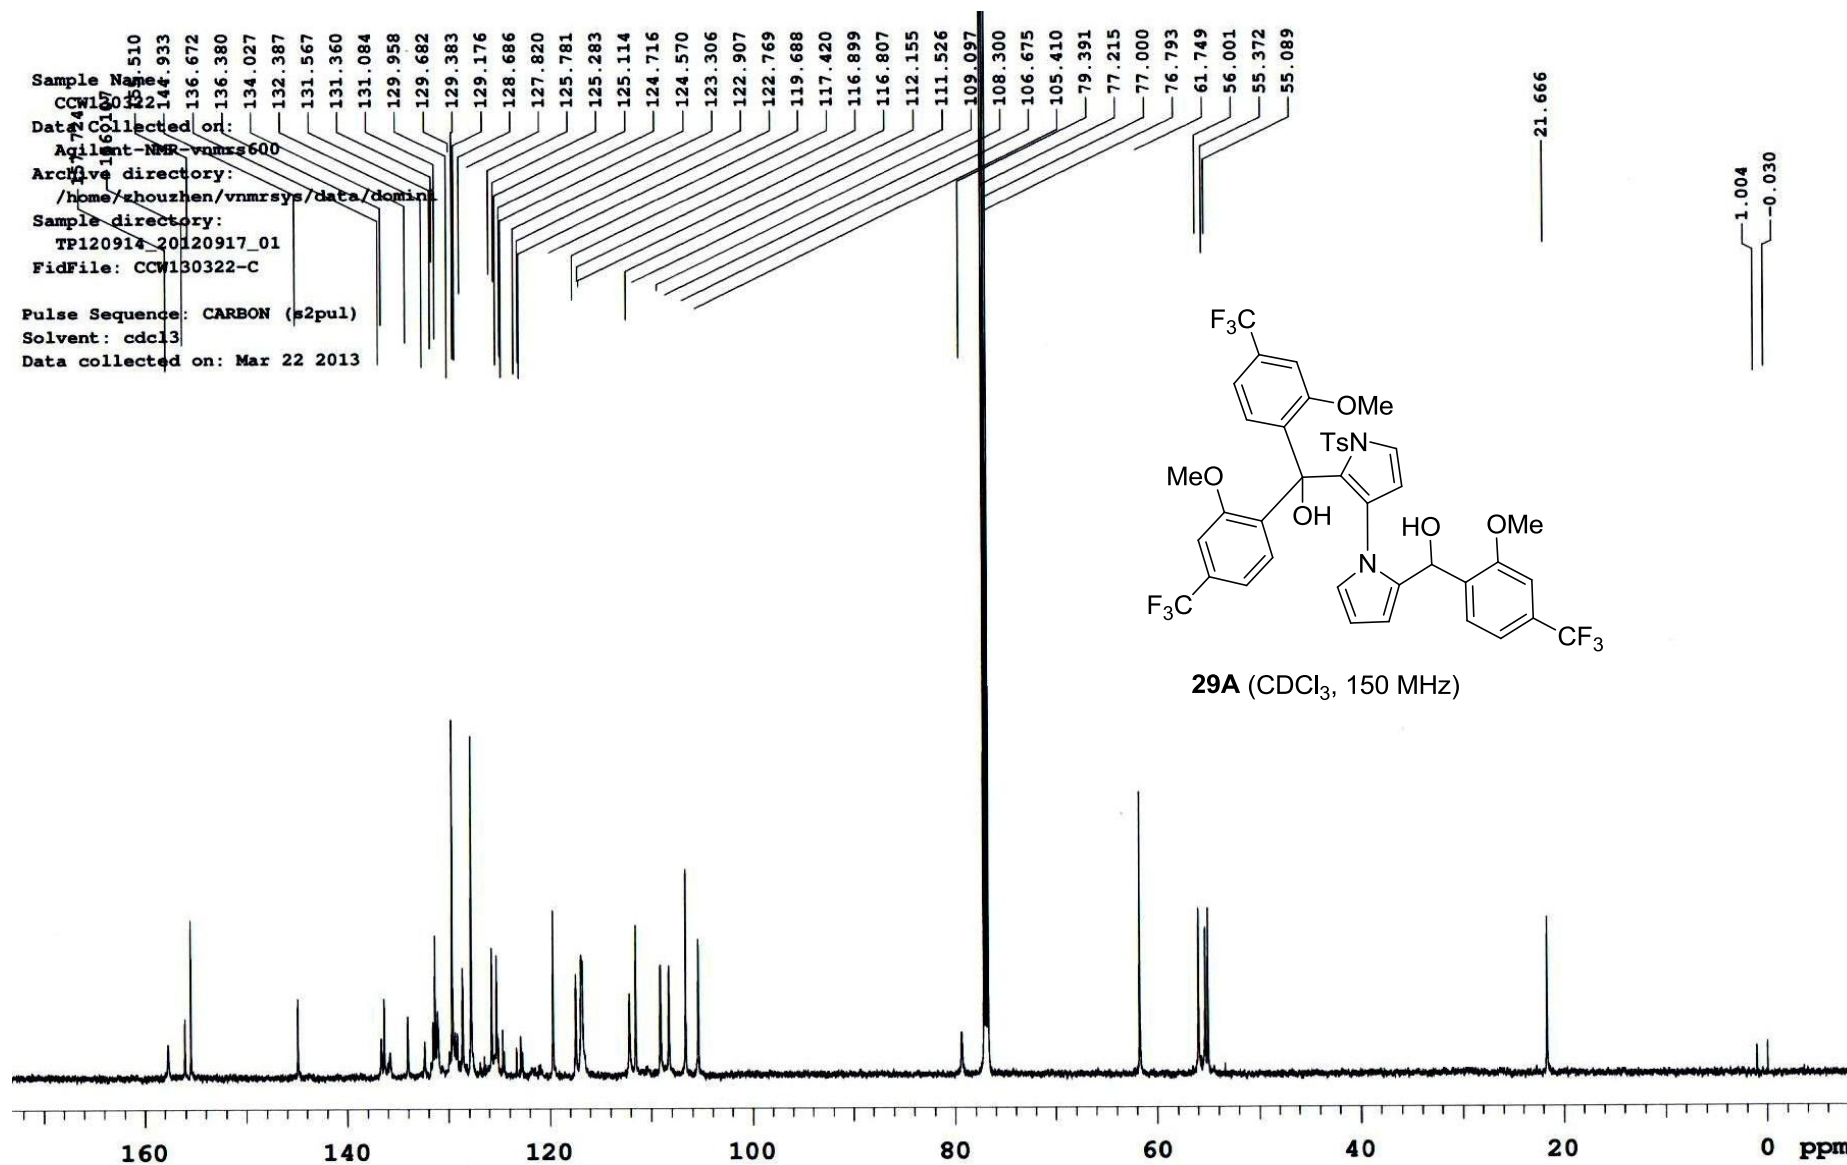



Figure S49.  $^1\text{H}$  NMR spectrum of **30**.

CCW103102 H1 CDC13 2010-3-10

Pulse Sequence: s2pu1

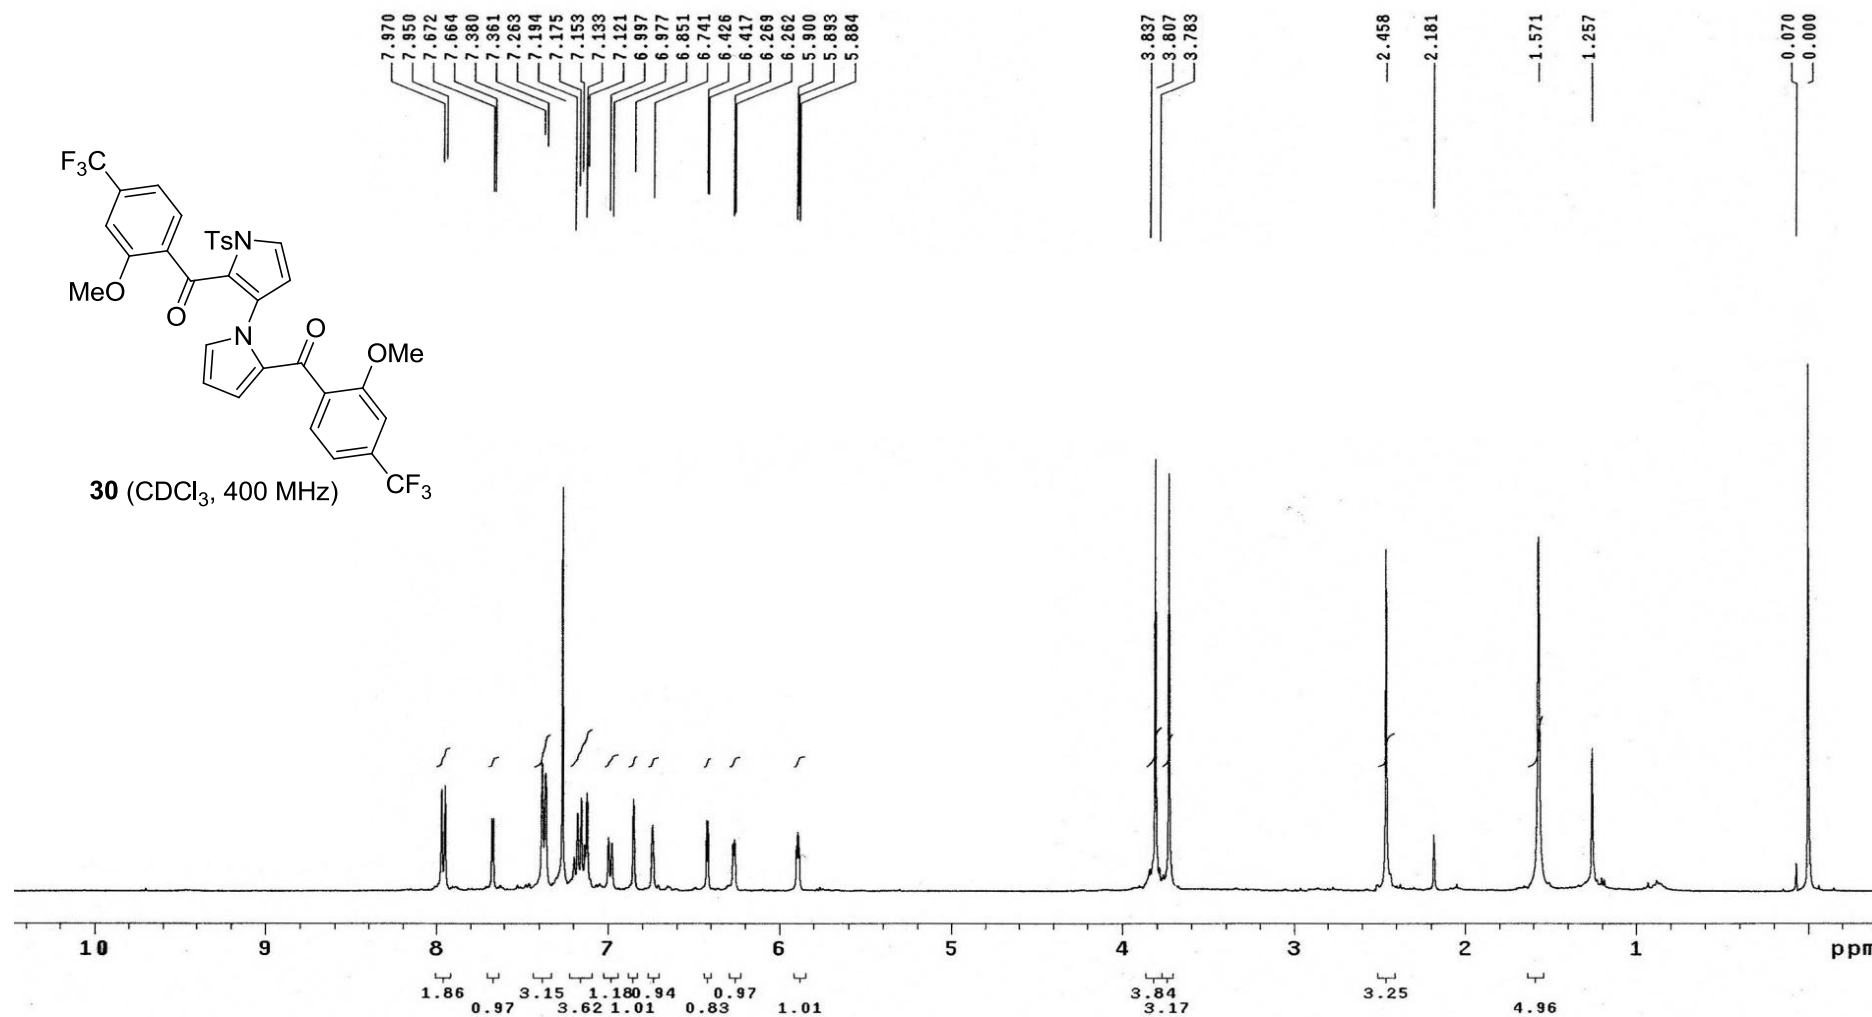

Figure S50.  $^{13}\text{C}$  NMR spectrum of 30.

CCW11321-CDCL3-C13-2011-3-22

Pulse Sequence: s2pu1

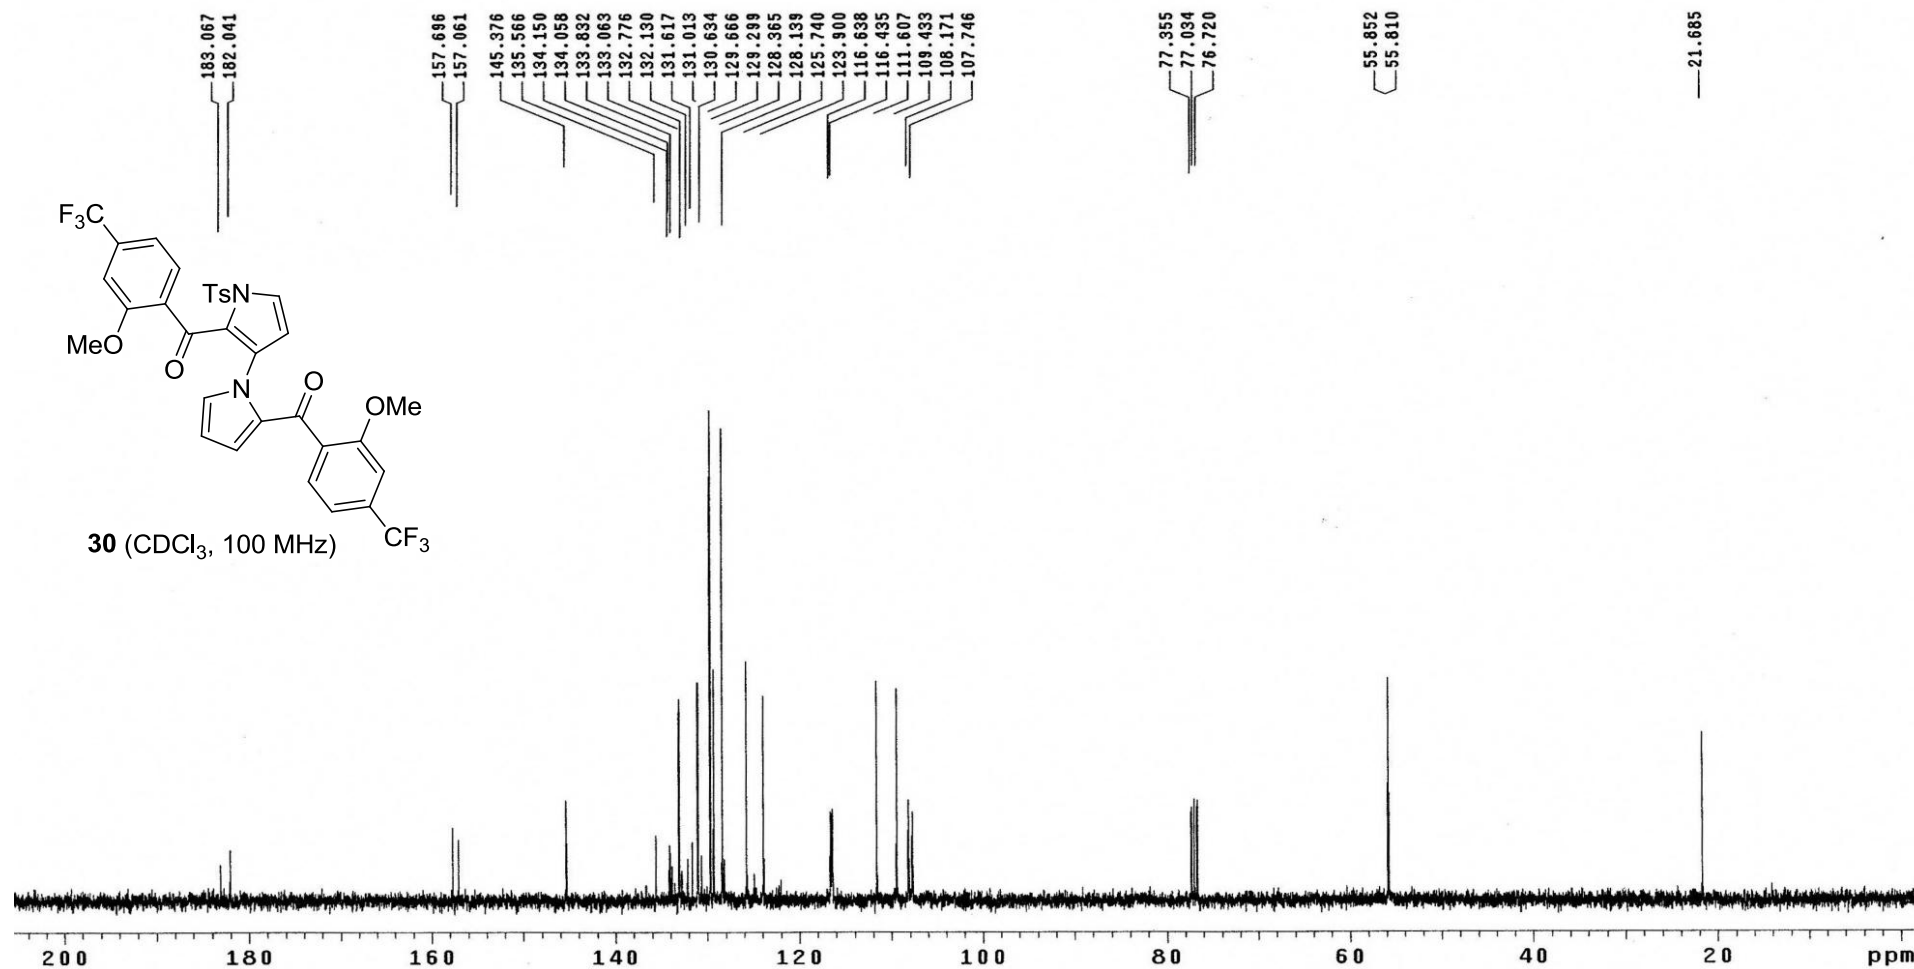

Figure S51.  $^1\text{H}$  NMR spectrum of 31.

CCW10316 H1 CDC13 2010-3-16  
Pulse Sequence: s2pu1

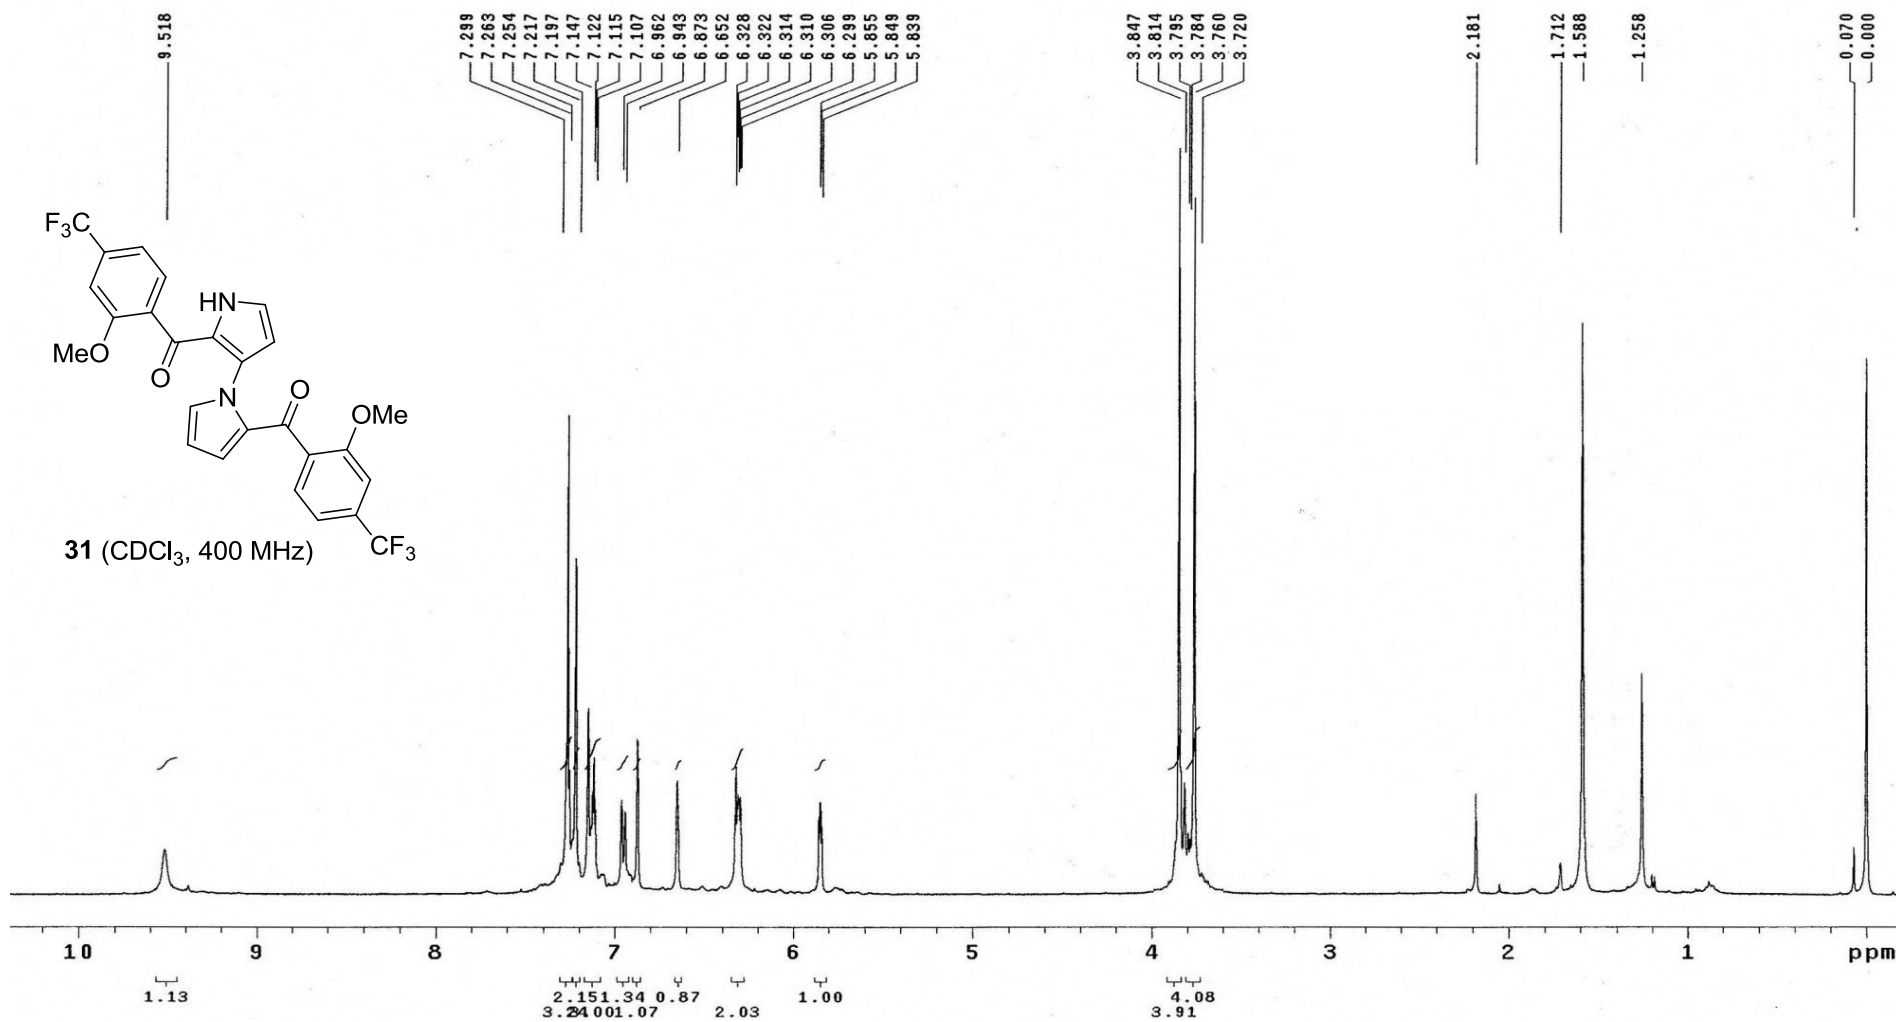

Figure S52.  $^{13}\text{C}$  NMR spectrum of 31.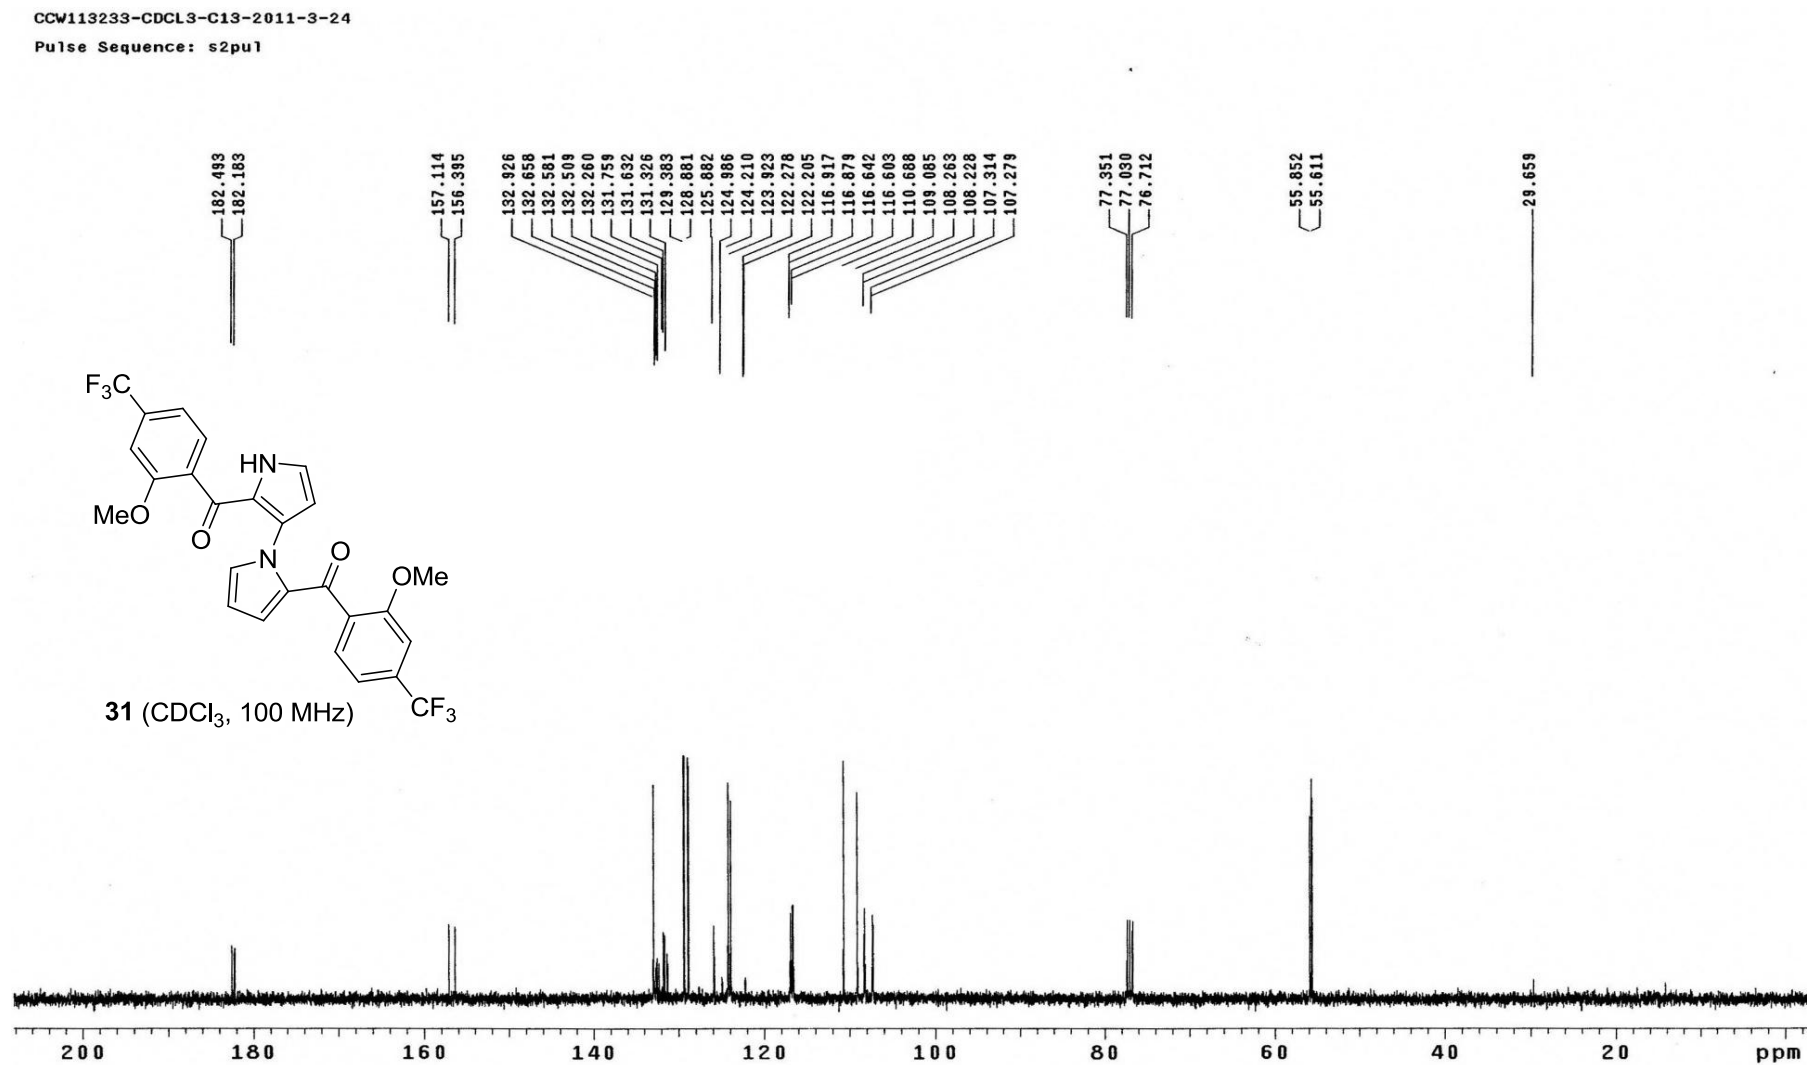

Figure S53.  $^1\text{H}$  NMR spectrum of 32.

CCW12423 H1 CDC13 2012-4-23  
Pulse Sequence: s2pu1

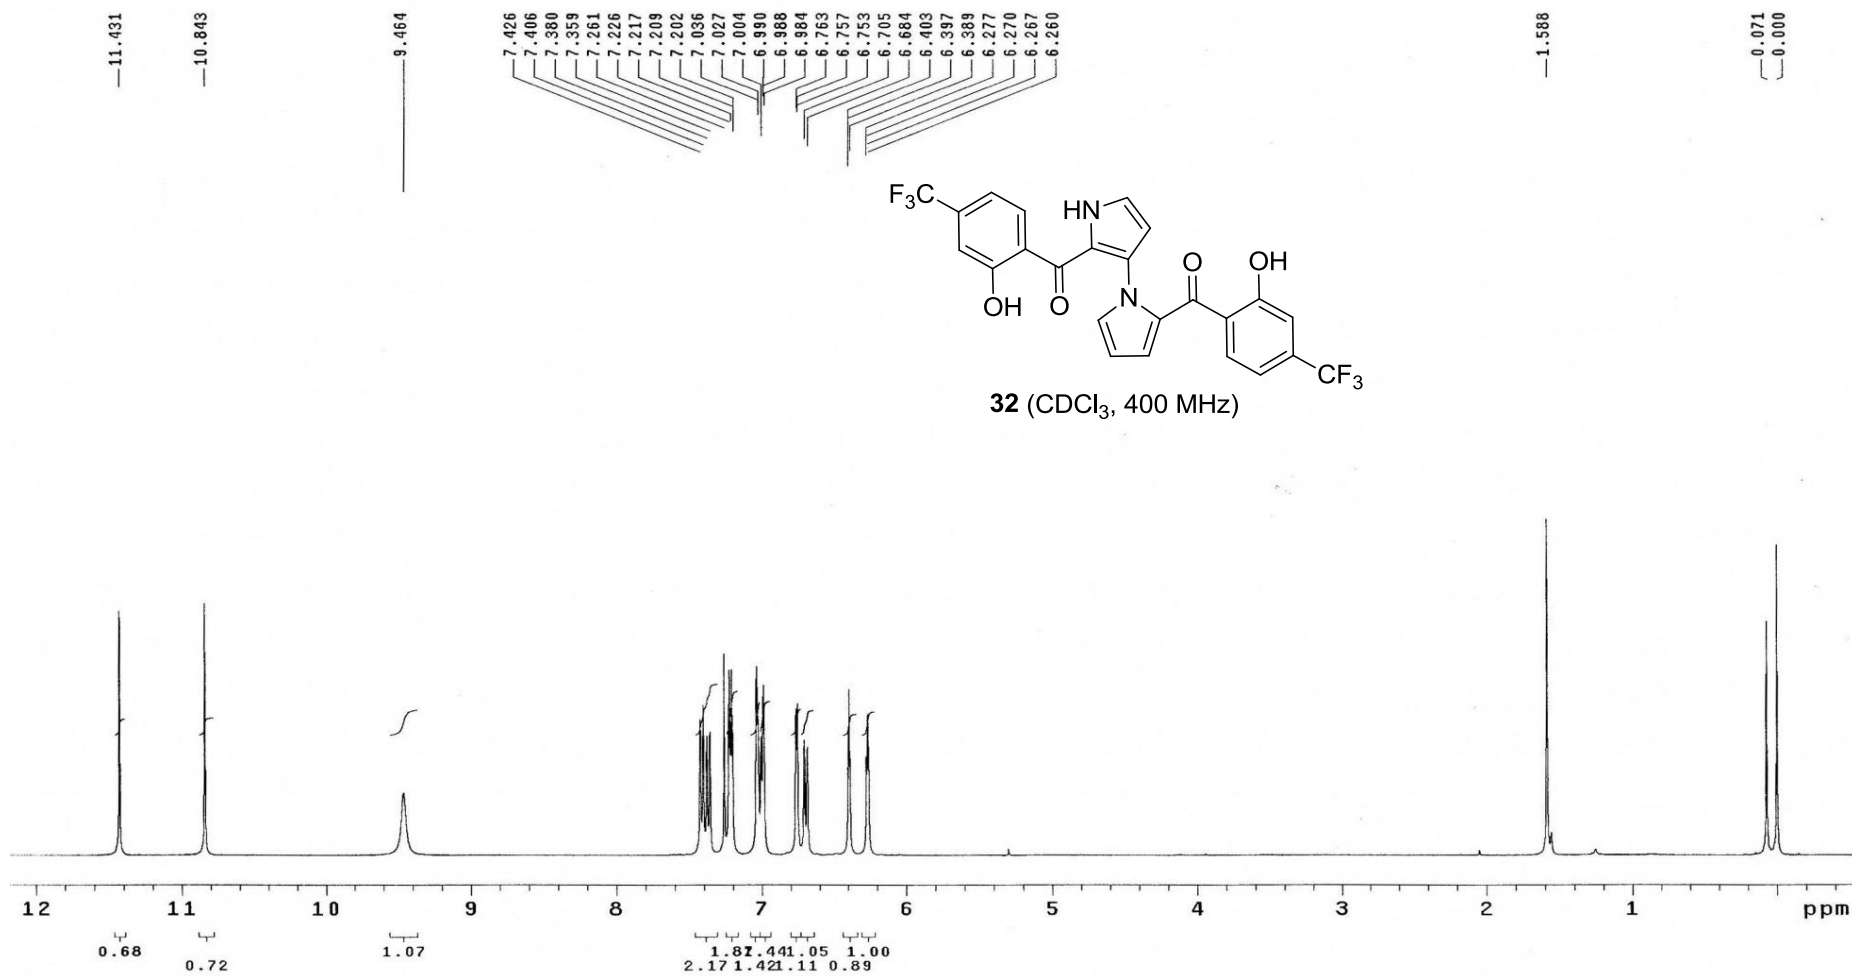

Figure S54.  $^{13}\text{C}$  NMR spectrum of 32.

CCW110711B-CDCL3-C13-2011-7-11

Pulse Sequence: s2pu1

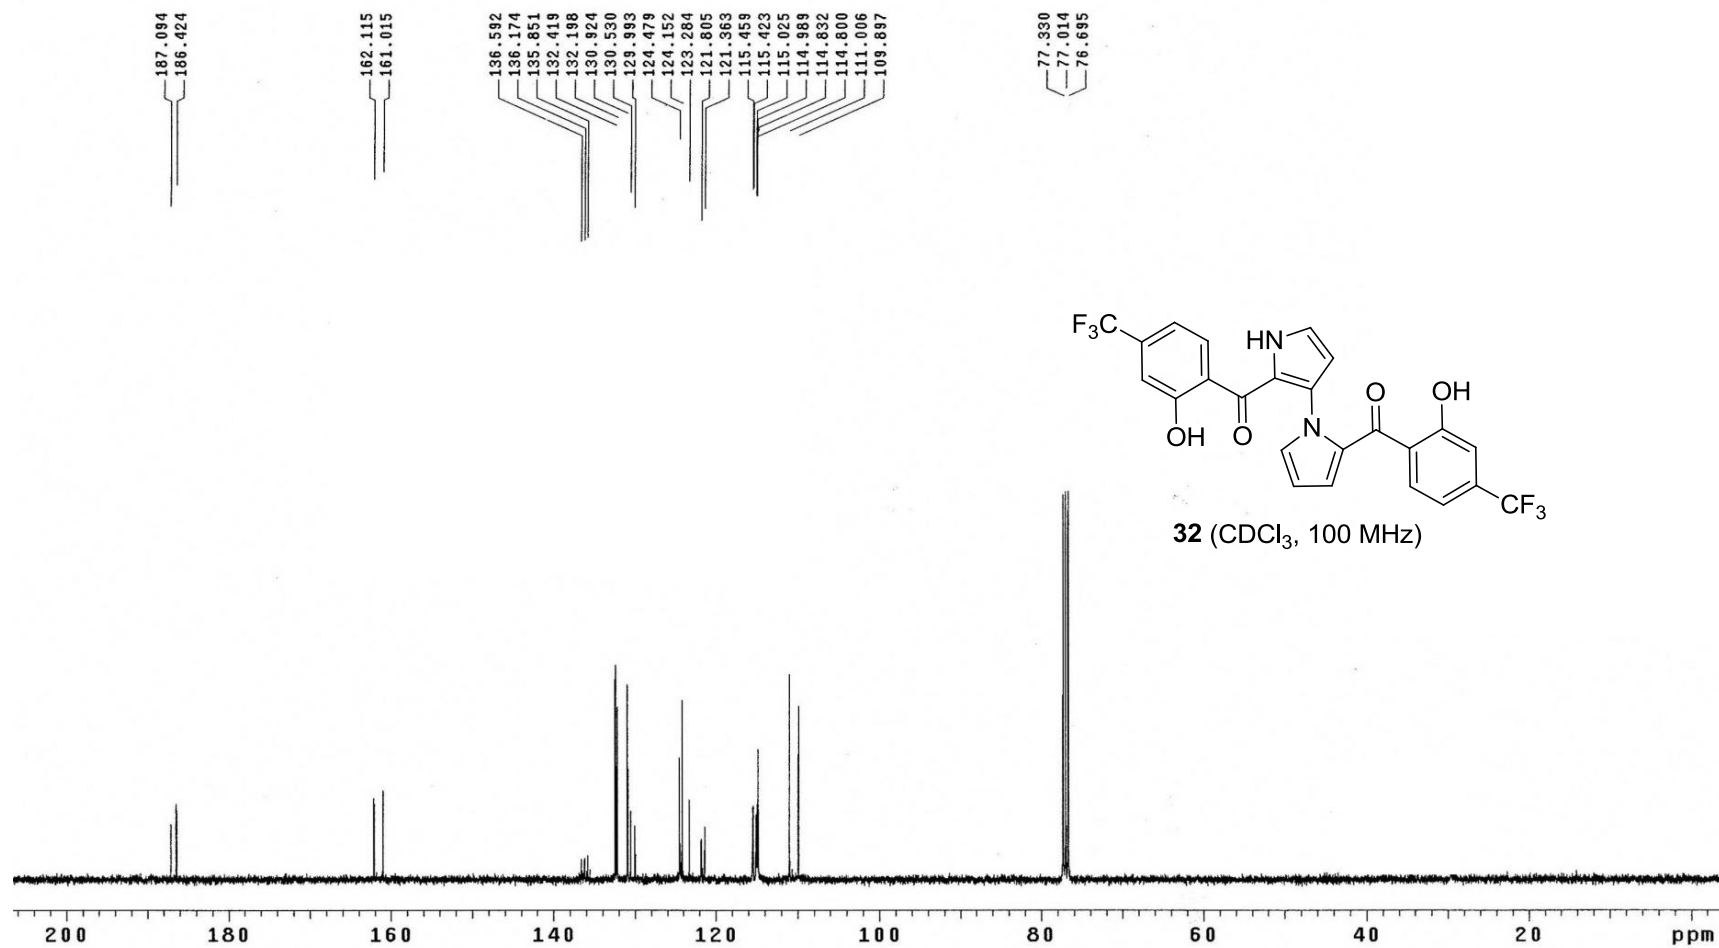

Figure S55. <sup>1</sup>H NMR spectrum of **33**.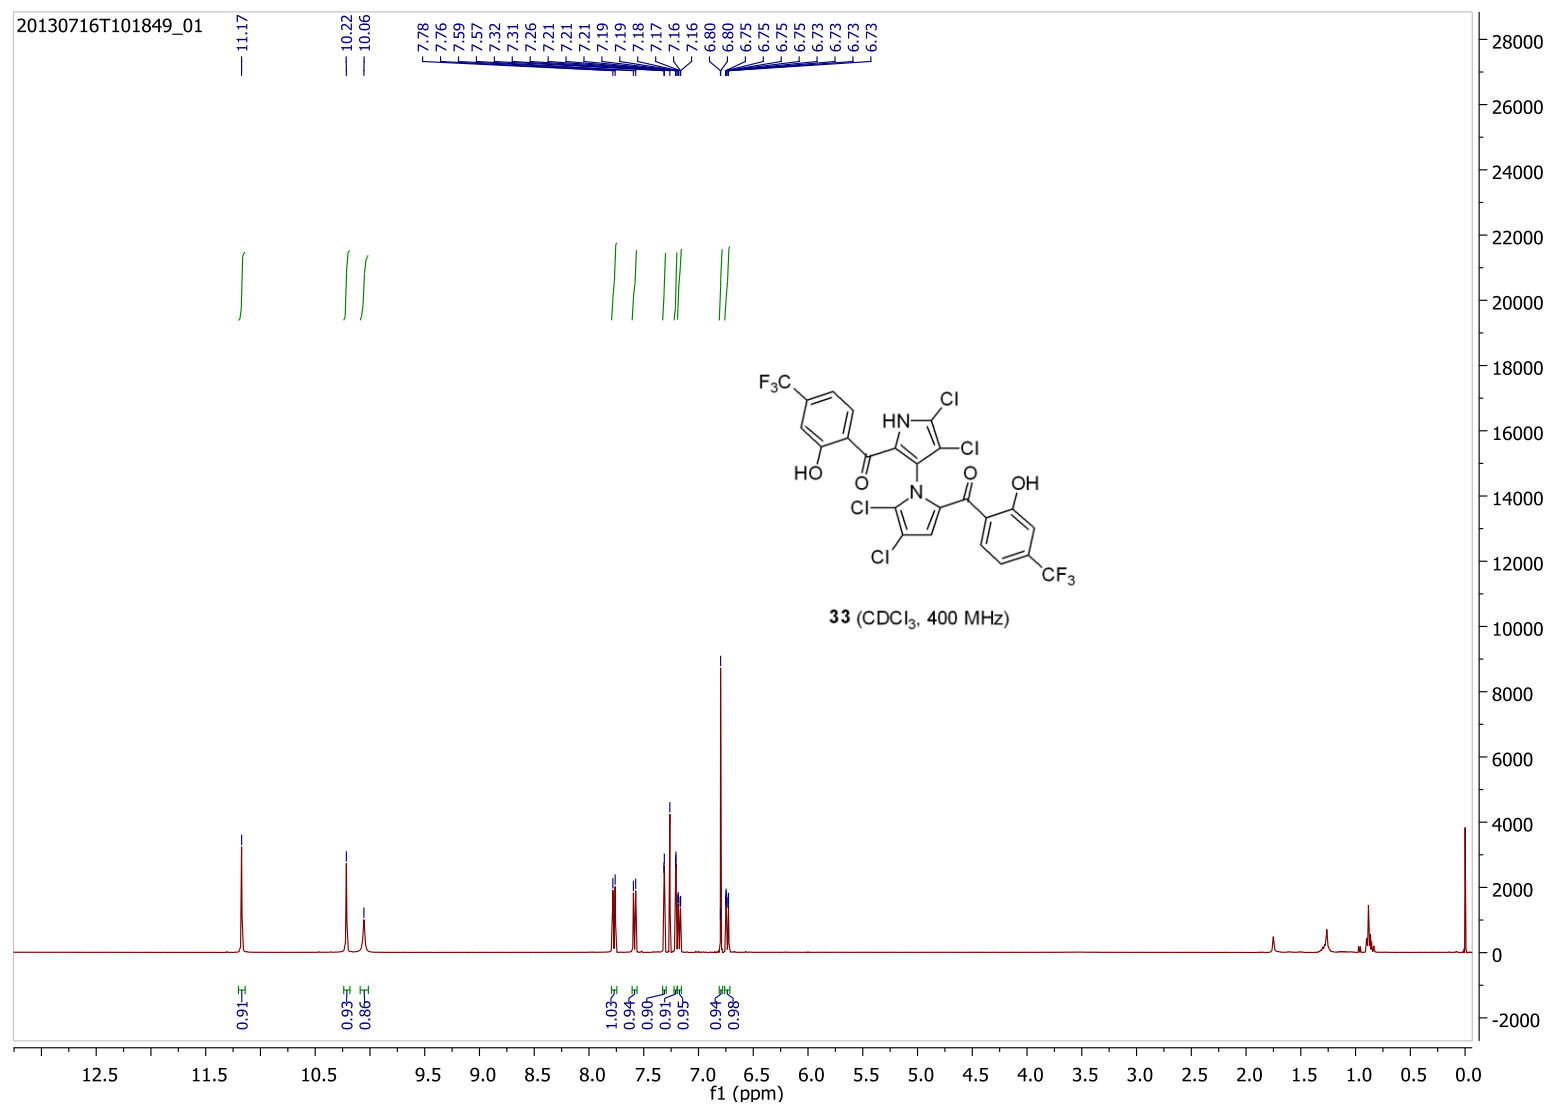

Figure S56.  $^{13}\text{C}$  NMR spectrum of **33**.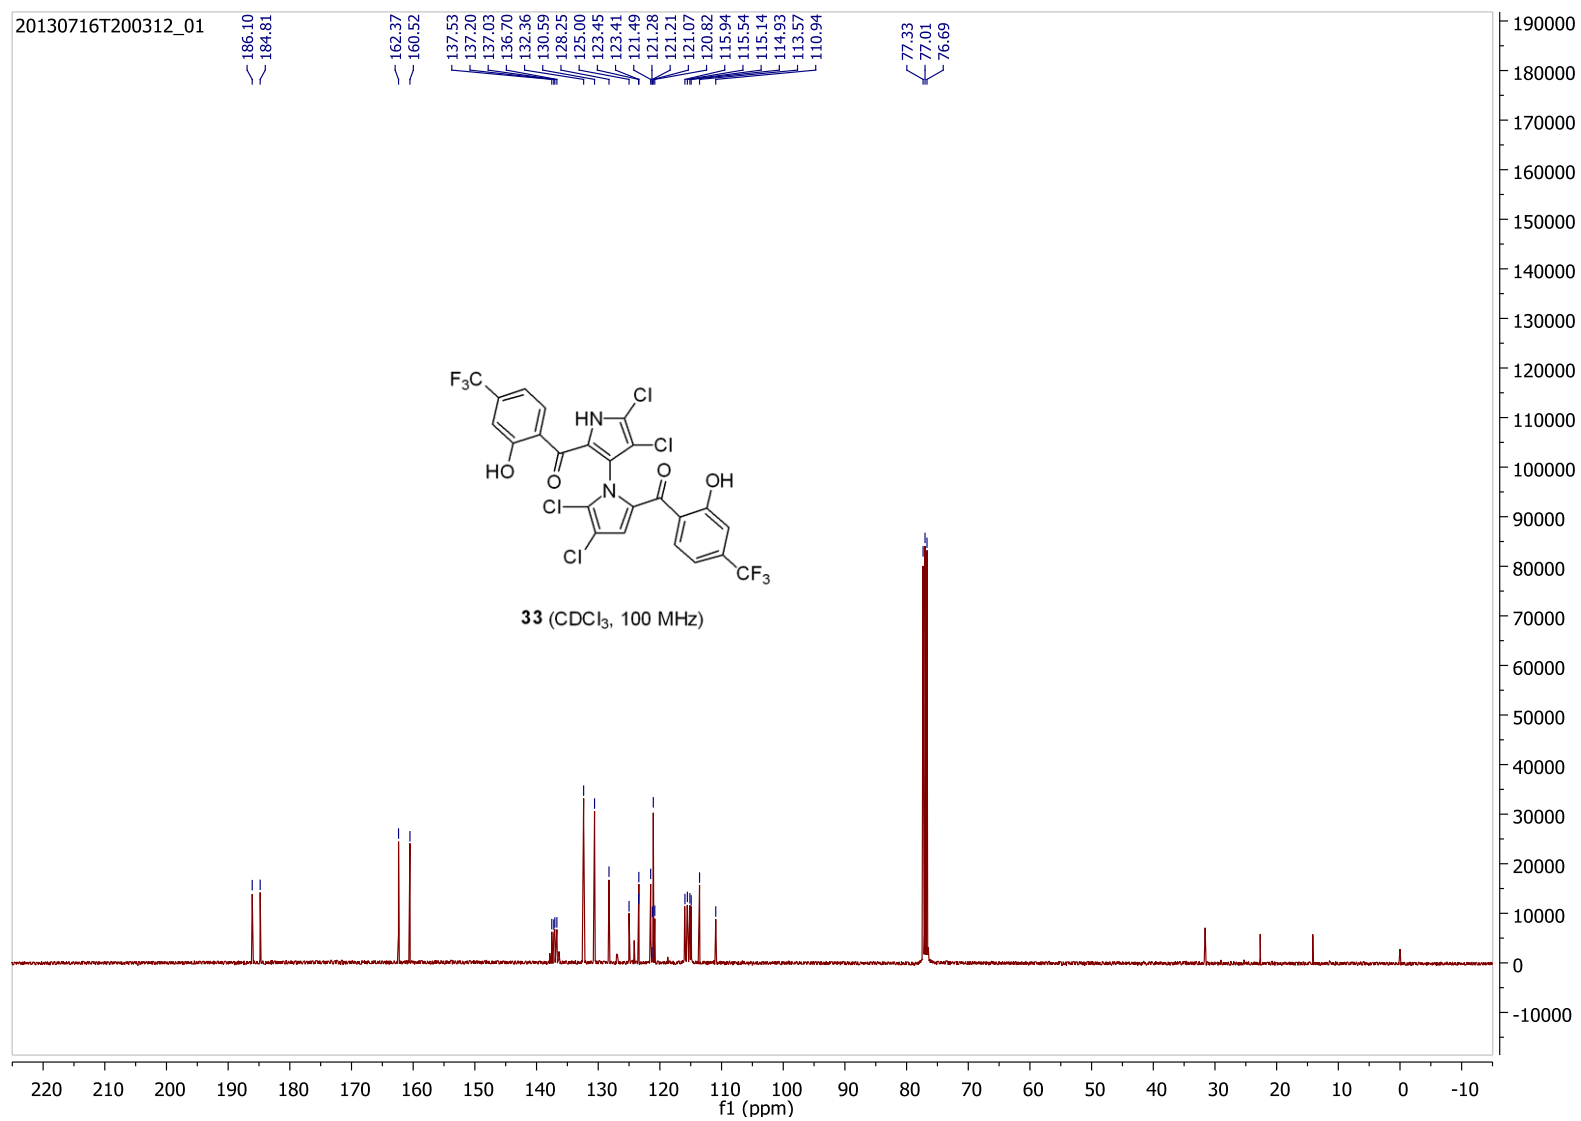



Figure S57. Purity of 24 by HPLC.

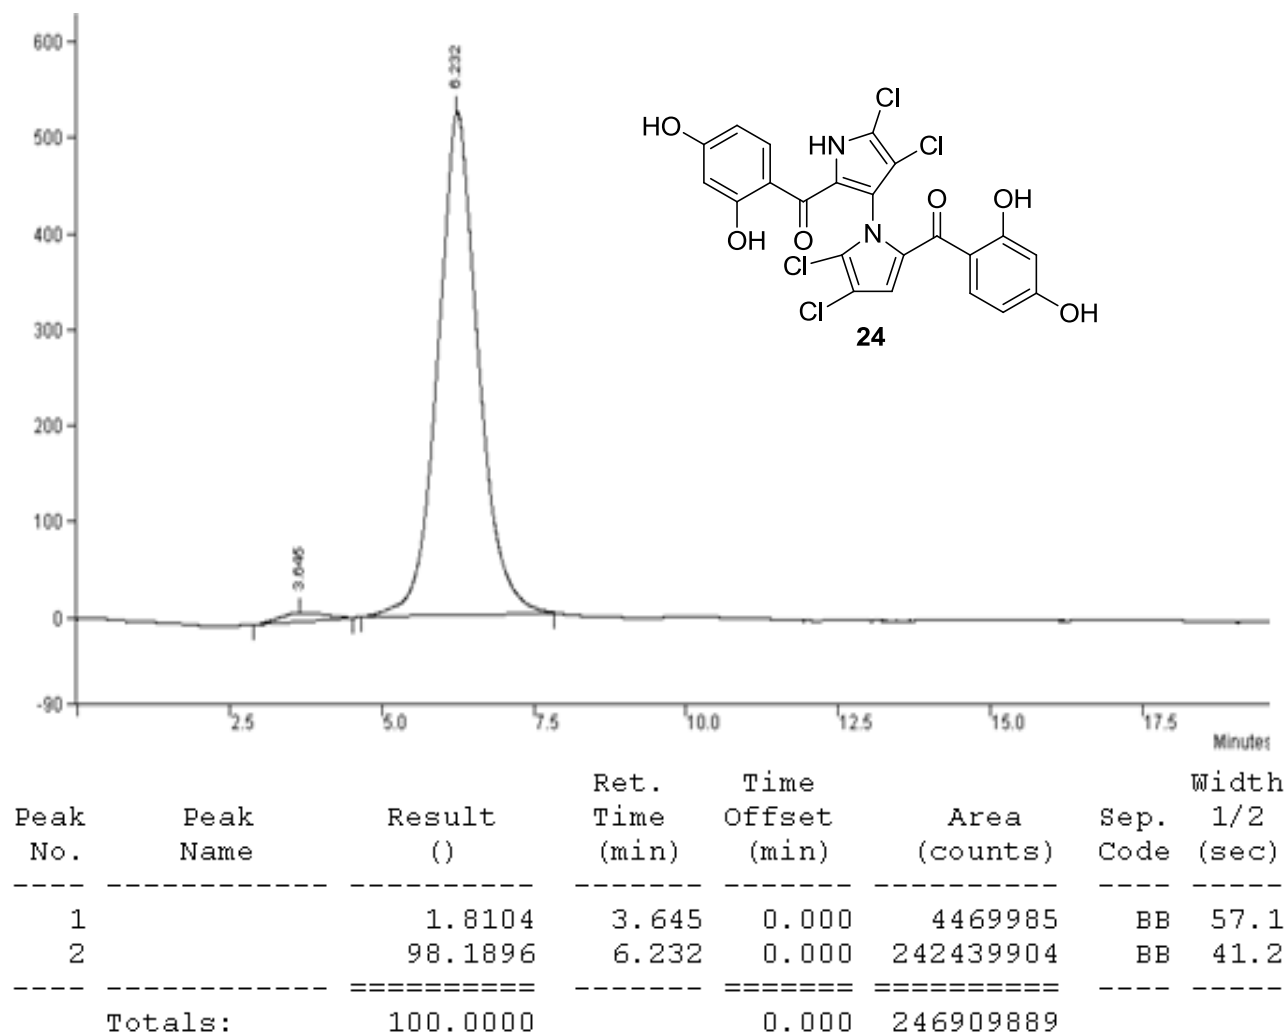

Figure S58. Purity of 33 by HPLC.

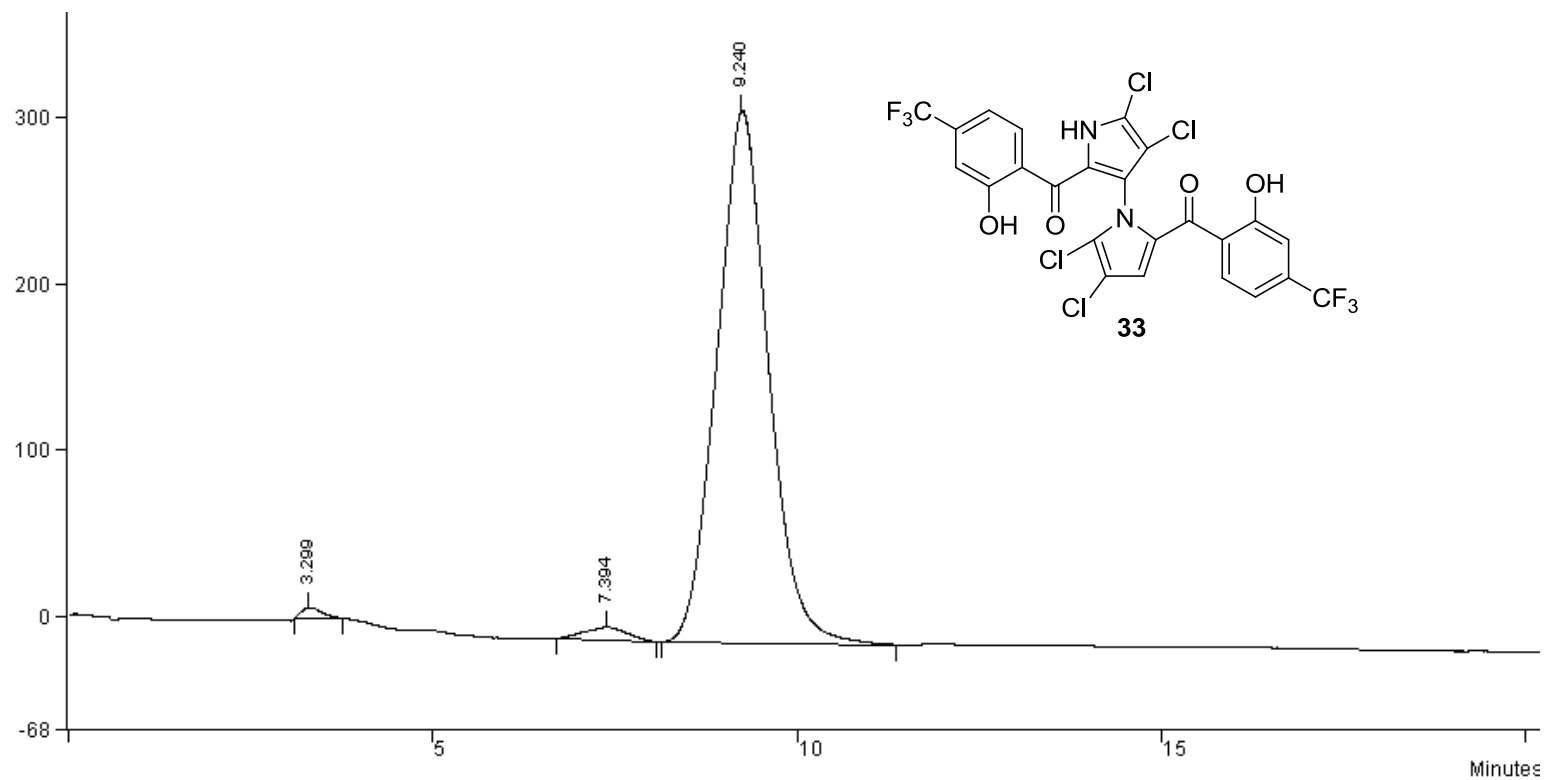

| Peak No. | Peak Name | Result ( ) | Ret. Time (min) | Time Offset (min) | Area (counts) | Sep. Code | Width 1/2 (sec) |
|----------|-----------|------------|-----------------|-------------------|---------------|-----------|-----------------|
| 1        |           | 0.7681     | 3.299           | 0.000             | 1244523       | BB        | 18.7            |
| 2        |           | 2.0153     | 7.394           | 0.000             | 3265186       | BB        | 38.0            |
| 3        |           | 97.2166    | 9.240           | 0.000             | 157511904     | BB        | 44.6            |
| Totals:  |           | 100.0000   |                 | 0.000             | 162021613     |           |                 |
