# Supplementary material for: Marinopyrrole Derivatives as Potential Antibiotic Agents against Methicillin-Resistant Staphylococcus aureus (II)
Source: MDPI journal article supplement (doi:10.3390/md11082927), 2013-08-15
Supplement: s2 [file s2]

marinedrugs-11-02927-s001.mol
  corina  04141403413D 1   1.00000     0.00000 
CORINA 3.49 0023  12.04.2013
 71 80  0  0  0  0  0  0  0  0999 V2000
    0.2531    0.8059    0.1242 C   0  0  0  0  0  0  0  0  0  0  0  0
    0.0506   -0.5589    0.2035 C   0  0  0  0  0  0  0  0  0  0  0  0
    1.1360   -1.4181    0.2977 C   0  0  0  0  0  0  0  0  0  0  0  0
    2.4246   -0.9065    0.3121 C   0  0  0  0  0  0  0  0  0  0  0  0
    2.6251    0.4627    0.2324 C   0  0  0  0  0  0  0  0  0  0  0  0
    1.5361    1.3181    0.1385 C   0  0  0  0  0  0  0  0  0  0  0  0
   -1.3502   -1.1143    0.1882 C   0  0  0  0  0  0  0  0  0  0  0  0
   -1.7989   -1.3151    1.6004 C   0  0  0  0  0  0  0  0  0  0  0  0
   -1.3108   -0.7871    2.7349 C   0  0  0  0  0  0  0  0  0  0  0  0
   -2.0330   -1.3486    3.8101 C   0  0  0  0  0  0  0  0  0  0  0  0
   -2.9571   -2.1884    3.2856 C   0  0  0  0  0  0  0  0  0  0  0  0
   -2.8450   -2.1363    1.9448 N   0  0  0  0  0  0  0  0  0  0  0  0
   -3.6205   -2.7022    0.9090 C   0  0  0  0  0  0  0  0  0  0  0  0
   -3.9406   -1.8993   -0.2183 C   0  0  0  0  0  0  0  0  0  0  0  0
   -4.6163   -2.6805   -1.0725 C   0  0  0  0  0  0  0  0  0  0  0  0
   -4.1494   -3.9112    0.7252 C   0  0  0  0  0  0  0  0  0  0  0  0
   -3.5891   -0.4479   -0.3114 C   0  0  0  0  0  0  0  0  0  0  0  0
   -2.1888   -0.2234   -0.5694 O   0  0  0  0  0  0  0  0  0  0  0  0
   -4.3933    0.1757   -1.4229 C   0  0  0  0  0  0  0  0  0  0  0  0
   -4.2056   -0.2418   -2.7329 C   0  0  0  0  0  0  0  0  0  0  0  0
   -4.9461    0.3320   -3.7549 C   0  0  0  0  0  0  0  0  0  0  0  0
   -5.8725    1.3218   -3.4652 C   0  0  0  0  0  0  0  0  0  0  0  0
   -6.0564    1.7359   -2.1535 C   0  0  0  0  0  0  0  0  0  0  0  0
   -5.3210    1.1588   -1.1360 C   0  0  0  0  0  0  0  0  0  0  0  0
   -3.9573    0.2247    0.9859 C   0  0  0  0  0  0  0  0  0  0  0  0
   -5.2341    0.0723    1.5079 C   0  0  0  0  0  0  0  0  0  0  0  0
   -3.0217    0.9881    1.6576 C   0  0  0  0  0  0  0  0  0  0  0  0
   -3.3561    1.6057    2.8475 C   0  0  0  0  0  0  0  0  0  0  0  0
   -4.6331    1.4606    3.3709 C   0  0  0  0  0  0  0  0  0  0  0  0
   -5.5722    0.6913    2.7014 C   0  0  0  0  0  0  0  0  0  0  0  0
   -6.1523   -0.6828    0.8494 O   0  0  0  0  0  0  0  0  0  0  0  0
   -7.4058   -0.8951    1.5019 C   0  0  0  0  0  0  0  0  0  0  0  0
   -3.2965   -1.2120   -3.0139 O   0  0  0  0  0  0  0  0  0  0  0  0
   -3.0661   -1.5055   -4.3933 C   0  0  0  0  0  0  0  0  0  0  0  0
   -4.9612    2.0675    4.5418 O   0  0  0  0  0  0  0  0  0  0  0  0
   -4.4851    3.4321    6.4549 C   0  0  0  0  0  0  0  0  0  0  0  0
   -4.3767    2.7334    7.6428 C   0  0  0  0  0  0  0  0  0  0  0  0
   -4.8697    3.2793    8.8132 C   0  0  0  0  0  0  0  0  0  0  0  0
   -5.4707    4.5241    8.7958 C   0  0  0  0  0  0  0  0  0  0  0  0
   -5.5783    5.2231    7.6081 C   0  0  0  0  0  0  0  0  0  0  0  0
   -5.0866    4.6766    6.4374 C   0  0  0  0  0  0  0  0  0  0  0  0
   -3.9422    2.8397    5.1800 C   0  0  0  0  0  0  0  0  0  0  0  0
    3.8869    0.9672    0.2468 O   0  0  0  0  0  0  0  0  0  0  0  0
    5.4788    2.7593    0.1915 C   0  0  0  0  0  0  0  0  0  0  0  0
    6.1925    2.8538   -0.9886 C   0  0  0  0  0  0  0  0  0  0  0  0
    7.5304    3.2003   -0.9614 C   0  0  0  0  0  0  0  0  0  0  0  0
    8.1546    3.4527    0.2459 C   0  0  0  0  0  0  0  0  0  0  0  0
    7.4407    3.3591    1.4260 C   0  0  0  0  0  0  0  0  0  0  0  0
    6.1031    3.0112    1.3989 C   0  0  0  0  0  0  0  0  0  0  0  0
    4.0187    2.3876    0.1614 C   0  0  0  0  0  0  0  0  0  0  0  0
    0.9362   -2.7601    0.3761 O   0  0  0  0  0  0  0  0  0  0  0  0
    2.0993   -3.5847    0.4708 C   0  0  0  0  0  0  0  0  0  0  0  0
   -6.5995    1.8865   -4.4649 O   0  0  0  0  0  0  0  0  0  0  0  0
   -8.2435    3.4056   -5.3241 C   0  0  0  0  0  0  0  0  0  0  0  0
   -9.4145    2.8031   -5.7443 C   0  0  0  0  0  0  0  0  0  0  0  0
  -10.0669    3.2703   -6.8699 C   0  0  0  0  0  0  0  0  0  0  0  0
   -9.5485    4.3403   -7.5750 C   0  0  0  0  0  0  0  0  0  0  0  0
   -8.3780    4.9434   -7.1543 C   0  0  0  0  0  0  0  0  0  0  0  0
   -7.7248    4.4753   -6.0295 C   0  0  0  0  0  0  0  0  0  0  0  0
   -7.5356    2.9003   -4.0934 C   0  0  0  0  0  0  0  0  0  0  0  0
   -4.7594   -3.9159   -0.5041 N   0  0  0  0  0  0  0  0  0  0  0  0
   -4.3458   -6.1079   -2.1161 C   0  0  0  0  0  0  0  0  0  0  0  0
   -3.6267   -7.1242   -1.5154 C   0  0  0  0  0  0  0  0  0  0  0  0
   -2.6930   -7.8354   -2.2457 C   0  0  0  0  0  0  0  0  0  0  0  0
   -2.4789   -7.5306   -3.5770 C   0  0  0  0  0  0  0  0  0  0  0  0
   -3.1987   -6.5149   -4.1780 C   0  0  0  0  0  0  0  0  0  0  0  0
   -4.1313   -5.8028   -3.4472 C   0  0  0  0  0  0  0  0  0  0  0  0
   -1.4604   -8.3053   -4.3729 C   0  0  0  0  0  0  0  0  0  0  0  0
   -5.5410   -5.2062   -1.1872 S   0  0  0  0  0  0  0  0  0  0  0  0
   -5.9354   -6.0502   -0.1142 O   0  0  0  0  0  0  0  0  0  0  0  0
   -6.4580   -4.6669   -2.1293 O   0  0  0  0  0  0  0  0  0  0  0  0
  1  2  1  0      
  2  3  2  0      
  3  4  1  0      
  4  5  2  0      
  5  6  1  0      
  6  1  2  0      
  2  7  1  0      
  7  8  1  0      
  8  9  2  0      
  9 10  1  0      
 10 11  2  0      
 11 12  1  0      
  8 12  1  0      
 12 13  1  0      
 13 14  1  0      
 14 15  2  0      
 16 13  2  0      
 14 17  1  0      
 17 18  1  0      
 18  7  1  0      
 17 19  1  0      
 19 20  2  0      
 20 21  1  0      
 21 22  2  0      
 22 23  1  0      
 23 24  2  0      
 24 19  1  0      
 17 25  1  0      
 25 26  1  0      
 25 27  2  0      
 27 28  1  0      
 28 29  2  0      
 29 30  1  0      
 30 26  2  0      
 26 31  1  0      
 31 32  1  0      
 33 34  1  0      
 20 33  1  0      
 35 42  1  0      
 36 37  2  0      
 37 38  1  0      
 38 39  2  0      
 39 40  1  0      
 40 41  2  0      
 36 41  1  0      
 36 42  1  0      
 29 35  1  0      
 43 50  1  0      
 44 45  2  0      
 45 46  1  0      
 46 47  2  0      
 47 48  1  0      
 48 49  2  0      
 44 49  1  0      
 44 50  1  0      
  5 43  1  0      
 51 52  1  0      
  3 51  1  0      
 53 60  1  0      
 54 55  2  0      
 55 56  1  0      
 56 57  2  0      
 57 58  1  0      
 58 59  2  0      
 54 59  1  0      
 54 60  1  0      
 22 53  1  0      
 61 69  1  0      
 62 63  2  0      
 63 64  1  0      
 64 65  2  0      
 65 66  1  0      
 66 67  2  0      
 62 67  1  0      
 65 68  1  0      
 62 69  1  0      
 69 70  2  0      
 69 71  2  0      
 15 61  1  0      
 16 61  1  0      
M  STY  1   1 SUP
M  SLB  1   1   1
M  SAL   1  2  31  32
M  SBL   1  1  35
M  SMT   1 OMe
M  SBV   1 35   -8.0690    5.4852
M  STY  1   2 SUP
M  SLB  1   2   2
M  SAL   2  2  33  34
M  SBL   2  1  38
M  SMT   2 OMe
M  SBV   2 38   -6.9147    5.2789
M  STY  1   3 SUP
M  SLB  1   3   3
M  SAL   3  8  35  36  37  38  39  40  41  42
M  SBL   3  1  47
M  SMT   3 OBn
M  SBV   3 47   -7.4781    5.8425
M  STY  1   4 SUP
M  SLB  1   4   4
M  SAL   4  8  43  44  45  46  47  48  49  50
M  SBL   4  1  56
M  SMT   4 OBn
M  SBV   4 56   -6.5816    5.3006
M  STY  1   5 SUP
M  SLB  1   5   5
M  SAL   5  2  51  52
M  SBL   5  1  58
M  SMT   5 OMe
M  SBV   5 58   -8.0829    5.3780
M  STY  1   6 SUP
M  SLB  1   6   6
M  SAL   6  8  53  54  55  56  57  58  59  60
M  SBL   6  1  67
M  SMT   6 OBn
M  SBV   6 67   -6.4618    5.5920
M  STY  1   7 SUP
M  SLB  1   7   7
M  SAL   7 11  61  62  63  64  65  66  67  68  69  70  71
M  SBL   7  2  79  80
M  SMT   7 NTs
M  SBV   7 79   -7.8692    5.3343
M  SBV   7 80   -6.9253    6.2782
M  END
$$$$
