# Supplementary material for: Marinopyrrole Derivatives as Potential Antibiotic Agents against Methicillin-Resistant Staphylococcus aureus (II)
Source: MDPI journal article supplement (doi:10.3390/md11082927), 2013-08-15
Supplement: s3 [file s3]

marinedrugs-11-02927-s001.mol
  ChemDraw04141415332D

 71 80  0  0  0  0  0  0  0  0999 V2000
    1.3674   -1.9121    0.0000 C   0  0  0  0  0  0  0  0  0  0  0  0
    0.5424   -1.9121    0.0000 C   0  0  0  0  0  0  0  0  0  0  0  0
    0.1299   -2.6266    0.0000 C   0  0  0  0  0  0  0  0  0  0  0  0
    0.5424   -3.3410    0.0000 C   0  0  0  0  0  0  0  0  0  0  0  0
    1.3674   -3.3410    0.0000 C   0  0  0  0  0  0  0  0  0  0  0  0
    1.7799   -2.6266    0.0000 C   0  0  0  0  0  0  0  0  0  0  0  0
   -0.4535   -0.9162    0.0000 C   0  0  0  0  0  0  0  0  0  0  0  0
   -1.2504   -1.1298    0.0000 C   0  0  0  0  0  0  0  0  0  0  0  0
   -1.4639   -1.9266    0.0000 C   0  0  0  0  0  0  0  0  0  0  0  0
   -2.2889   -1.9266    0.0000 C   0  0  0  0  0  0  0  0  0  0  0  0
   -2.5024   -1.1298    0.0000 C   0  0  0  0  0  0  0  0  0  0  0  0
   -1.8708   -0.7291    0.0000 N   0  0  0  0  0  0  0  0  0  0  0  0
   -1.8708    0.0959    0.0000 C   0  0  0  0  0  0  0  0  0  0  0  0
   -1.2874    0.6793    0.0000 C   0  0  0  0  0  0  0  0  0  0  0  0
   -1.6619    1.4144    0.0000 C   0  0  0  0  0  0  0  0  0  0  0  0
   -2.6058    0.4705    0.0000 C   0  0  0  0  0  0  0  0  0  0  0  0
   -0.4905    0.4658    0.0000 C   0  0  0  0  0  0  0  0  0  0  0  0
   -0.2414   -0.2547    0.0000 O   0  0  0  0  0  0  0  0  0  0  0  0
    0.2240    0.0533    0.0000 C   0  0  0  0  0  0  0  0  0  0  0  0
    0.6365   -0.6612    0.0000 C   0  0  0  0  0  0  0  0  0  0  0  0
    1.4615   -0.6612    0.0000 C   0  0  0  0  0  0  0  0  0  0  0  0
    1.8740    0.0533    0.0000 C   0  0  0  0  0  0  0  0  0  0  0  0
    1.4615    0.7677    0.0000 C   0  0  0  0  0  0  0  0  0  0  0  0
    0.6365    0.7677    0.0000 C   0  0  0  0  0  0  0  0  0  0  0  0
   -0.0780    1.1802    0.0000 C   0  0  0  0  0  0  0  0  0  0  0  0
   -0.6614    1.7636    0.0000 C   0  0  0  0  0  0  0  0  0  0  0  0
    0.7189    1.3938    0.0000 C   0  0  0  0  0  0  0  0  0  0  0  0
    0.9324    2.1907    0.0000 C   0  0  0  0  0  0  0  0  0  0  0  0
    0.3490    2.7740    0.0000 C   0  0  0  0  0  0  0  0  0  0  0  0
   -0.4479    2.5605    0.0000 C   0  0  0  0  0  0  0  0  0  0  0  0
   -1.4591    1.7645    0.0000 O   0  0  0  0  0  0  0  0  0  0  0  0
   -2.0425    2.3479    0.0000 C   0  0  0  0  0  0  0  0  0  0  0  0
    0.9931   -0.8666    0.0000 O   0  0  0  0  0  0  0  0  0  0  0  0
    1.5825   -1.2069    0.0000 C   0  0  0  0  0  0  0  0  0  0  0  0
    0.1422    3.1322    0.0000 O   0  0  0  0  0  0  0  0  0  0  0  0
   -0.8788    3.7217    0.0000 C   0  0  0  0  0  0  0  0  0  0  0  0
   -1.2191    4.3111    0.0000 C   0  0  0  0  0  0  0  0  0  0  0  0
   -1.8997    4.3111    0.0000 C   0  0  0  0  0  0  0  0  0  0  0  0
   -2.2400    3.7217    0.0000 C   0  0  0  0  0  0  0  0  0  0  0  0
   -1.8997    3.1322    0.0000 C   0  0  0  0  0  0  0  0  0  0  0  0
   -1.2191    3.1322    0.0000 C   0  0  0  0  0  0  0  0  0  0  0  0
   -0.1981    3.7217    0.0000 C   0  0  0  0  0  0  0  0  0  0  0  0
    2.0571   -3.5247    0.0000 O   0  0  0  0  0  0  0  0  0  0  0  0
    3.1958   -3.8298    0.0000 C   0  0  0  0  0  0  0  0  0  0  0  0
    3.6770   -4.3111    0.0000 C   0  0  0  0  0  0  0  0  0  0  0  0
    4.3345   -4.1349    0.0000 C   0  0  0  0  0  0  0  0  0  0  0  0
    4.5106   -3.4775    0.0000 C   0  0  0  0  0  0  0  0  0  0  0  0
    4.0294   -2.9963    0.0000 C   0  0  0  0  0  0  0  0  0  0  0  0
    3.3720   -3.1724    0.0000 C   0  0  0  0  0  0  0  0  0  0  0  0
    2.5384   -4.0060    0.0000 C   0  0  0  0  0  0  0  0  0  0  0  0
   -0.6817   -2.7329    0.0000 O   0  0  0  0  0  0  0  0  0  0  0  0
   -1.0220   -2.1435    0.0000 C   0  0  0  0  0  0  0  0  0  0  0  0
    2.6835    0.1610    0.0000 O   0  0  0  0  0  0  0  0  0  0  0  0
    3.7044   -0.4284    0.0000 C   0  0  0  0  0  0  0  0  0  0  0  0
    4.0447   -1.0178    0.0000 C   0  0  0  0  0  0  0  0  0  0  0  0
    4.7253   -1.0178    0.0000 C   0  0  0  0  0  0  0  0  0  0  0  0
    5.0657   -0.4284    0.0000 C   0  0  0  0  0  0  0  0  0  0  0  0
    4.7253    0.1610    0.0000 C   0  0  0  0  0  0  0  0  0  0  0  0
    4.0447    0.1610    0.0000 C   0  0  0  0  0  0  0  0  0  0  0  0
    3.0238   -0.4284    0.0000 C   0  0  0  0  0  0  0  0  0  0  0  0
   -2.2598    1.2644    0.0000 N   0  0  0  0  0  0  0  0  0  0  0  0
   -3.0934    1.7456    0.0000 C   0  0  0  0  0  0  0  0  0  0  0  0
   -3.5746    2.2270    0.0000 C   0  0  0  0  0  0  0  0  0  0  0  0
   -4.2321    2.0508    0.0000 C   0  0  0  0  0  0  0  0  0  0  0  0
   -4.4082    1.3934    0.0000 C   0  0  0  0  0  0  0  0  0  0  0  0
   -3.9270    0.9121    0.0000 C   0  0  0  0  0  0  0  0  0  0  0  0
   -3.2695    1.0882    0.0000 C   0  0  0  0  0  0  0  0  0  0  0  0
   -5.0657    1.2172    0.0000 C   0  0  0  0  0  0  0  0  0  0  0  0
   -2.4360    1.9219    0.0000 S   0  0  0  0  0  0  0  0  0  0  0  0
   -2.6121    2.5792    0.0000 O   0  0  0  0  0  0  0  0  0  0  0  0
   -1.7785    2.0980    0.0000 O   0  0  0  0  0  0  0  0  0  0  0  0
  1  2  1  0      
  2  3  2  0      
  3  4  1  0      
  4  5  2  0      
  5  6  1  0      
  6  1  2  0      
  2  7  1  0      
  7  8  1  0      
  8  9  2  0      
  9 10  1  0      
 10 11  2  0      
 11 12  1  0      
  8 12  1  0      
 12 13  1  0      
 13 14  1  0      
 14 15  2  0      
 16 13  2  0      
 14 17  1  0      
 17 18  1  0      
 18  7  1  0      
 17 19  1  0      
 19 20  2  0      
 20 21  1  0      
 21 22  2  0      
 22 23  1  0      
 23 24  2  0      
 24 19  1  0      
 17 25  1  0      
 25 26  1  0      
 25 27  2  0      
 27 28  1  0      
 28 29  2  0      
 29 30  1  0      
 30 26  2  0      
 26 31  1  0      
 31 32  1  0      
 33 34  1  0      
 20 33  1  0      
 35 42  1  0      
 36 37  2  0      
 37 38  1  0      
 38 39  2  0      
 39 40  1  0      
 40 41  2  0      
 36 41  1  0      
 36 42  1  0      
 29 35  1  0      
 43 50  1  0      
 44 45  2  0      
 45 46  1  0      
 46 47  2  0      
 47 48  1  0      
 48 49  2  0      
 44 49  1  0      
 44 50  1  0      
  5 43  1  0      
 51 52  1  0      
  3 51  1  0      
 53 60  1  0      
 54 55  2  0      
 55 56  1  0      
 56 57  2  0      
 57 58  1  0      
 58 59  2  0      
 54 59  1  0      
 54 60  1  0      
 22 53  1  0      
 61 69  1  0      
 62 63  2  0      
 63 64  1  0      
 64 65  2  0      
 65 66  1  0      
 66 67  2  0      
 62 67  1  0      
 65 68  1  0      
 62 69  1  0      
 69 70  2  0      
 69 71  2  0      
 15 61  1  0      
 16 61  1  0      
M  STY  1   1 SUP
M  SLB  1   1   1
M  SAL   1  2  31  32
M  SBL   1  1  35
M  SMT   1 OMe
M  SBV   1 35   -8.0690    5.4852
M  STY  1   2 SUP
M  SLB  1   2   2
M  SAL   2  2  33  34
M  SBL   2  1  38
M  SMT   2 OMe
M  SBV   2 38   -6.9147    5.2789
M  STY  1   3 SUP
M  SLB  1   3   3
M  SAL   3  8  35  36  37  38  39  40  41  42
M  SBL   3  1  47
M  SMT   3 OBn
M  SBV   3 47   -7.4781    5.8425
M  STY  1   4 SUP
M  SLB  1   4   4
M  SAL   4  8  43  44  45  46  47  48  49  50
M  SBL   4  1  56
M  SMT   4 OBn
M  SBV   4 56   -6.5816    5.3006
M  STY  1   5 SUP
M  SLB  1   5   5
M  SAL   5  2  51  52
M  SBL   5  1  58
M  SMT   5 OMe
M  SBV   5 58   -8.0829    5.3780
M  STY  1   6 SUP
M  SLB  1   6   6
M  SAL   6  8  53  54  55  56  57  58  59  60
M  SBL   6  1  67
M  SMT   6 OBn
M  SBV   6 67   -6.4618    5.5920
M  STY  1   7 SUP
M  SLB  1   7   7
M  SAL   7 11  61  62  63  64  65  66  67  68  69  70  71
M  SBL   7  2  79  80
M  SMT   7 NTs
M  SBV   7 79   -7.8692    5.3343
M  SBV   7 80   -6.9253    6.2782
M  END
