# Supplementary material for: Marinopyrrole Derivatives as Potential Antibiotic Agents against Methicillin-Resistant Staphylococcus aureus (II)
Source: MDPI journal article supplement (doi:10.3390/md11082927), 2013-08-15
Supplement: s4 [file s4]

marinedrugs-11-02927-s002.mol
  corina  04141403413D 1   1.00000     0.00000 
CORINA 3.49 0023  12.04.2013
 60 65  0  0  0  0  0  0  0  0999 V2000
    2.7870    1.6573   -0.1263 C   0  0  0  0  0  0  0  0  0  0  0  0
    2.8104    0.5684   -0.9227 C   0  0  0  0  0  0  0  0  0  0  0  0
    1.6988    0.6515   -1.7841 C   0  0  0  0  0  0  0  0  0  0  0  0
    1.0373    1.7880   -1.4823 C   0  0  0  0  0  0  0  0  0  0  0  0
    1.7006    2.4101   -0.4650 N   0  0  0  0  0  0  0  0  0  0  0  0
    1.3257    3.6273    0.1361 C   0  0  0  0  0  0  0  0  0  0  0  0
    1.4114    4.9106   -0.4478 C   0  0  0  0  0  0  0  0  0  0  0  0
    0.9535    5.7982    0.4578 C   0  0  0  0  0  0  0  0  0  0  0  0
    0.8113    3.7835    1.3777 C   0  0  0  0  0  0  0  0  0  0  0  0
    3.7849    1.9827    0.9551 C   0  0  0  0  0  0  0  0  0  0  0  0
    5.1434    2.1939    0.3379 C   0  0  0  0  0  0  0  0  0  0  0  0
    5.5021    3.4417   -0.1333 C   0  0  0  0  0  0  0  0  0  0  0  0
    6.7485    3.6362   -0.6998 C   0  0  0  0  0  0  0  0  0  0  0  0
    7.6386    2.5828   -0.7959 C   0  0  0  0  0  0  0  0  0  0  0  0
    7.2845    1.3325   -0.3264 C   0  0  0  0  0  0  0  0  0  0  0  0
    6.0372    1.1363    0.2478 C   0  0  0  0  0  0  0  0  0  0  0  0
    0.5369    2.6802    2.3669 C   0  0  0  0  0  0  0  0  0  0  0  0
   -0.8716    2.1775    2.1807 C   0  0  0  0  0  0  0  0  0  0  0  0
   -1.7454    2.1566    3.2507 C   0  0  0  0  0  0  0  0  0  0  0  0
   -1.2935    1.7406    0.9336 C   0  0  0  0  0  0  0  0  0  0  0  0
   -2.5909    1.2782    0.7655 C   0  0  0  0  0  0  0  0  0  0  0  0
   -3.4588    1.2541    1.8396 C   0  0  0  0  0  0  0  0  0  0  0  0
   -3.0374    1.6951    3.0807 C   0  0  0  0  0  0  0  0  0  0  0  0
    2.3459   -0.2195    0.7625 C   0  0  0  0  0  0  0  0  0  0  0  0
    1.4553    0.8172    0.9707 C   0  0  0  0  0  0  0  0  0  0  0  0
    1.5077    1.5500    2.1408 C   0  0  0  0  0  0  0  0  0  0  0  0
    2.4549    1.2447    3.1071 C   0  0  0  0  0  0  0  0  0  0  0  0
    3.3476    0.2038    2.8958 C   0  0  0  0  0  0  0  0  0  0  0  0
    3.2912   -0.5258    1.7243 C   0  0  0  0  0  0  0  0  0  0  0  0
    0.6916    3.1824    3.6957 O   0  0  0  0  0  0  0  0  0  0  0  0
    3.3801    3.1729    1.6344 O   0  0  0  0  0  0  0  0  0  0  0  0
   -0.4377    1.7657   -0.1218 O   0  0  0  0  0  0  0  0  0  0  0  0
   -0.8747    1.1334   -1.3265 C   0  0  0  0  0  0  0  0  0  0  0  0
    4.2601   -1.6568    1.4943 C   0  0  0  0  0  0  0  0  0  0  0  0
    3.6265   -2.8752    1.7610 F   0  0  0  0  0  0  0  0  0  0  0  0
    4.6924   -1.6373    0.1639 F   0  0  0  0  0  0  0  0  0  0  0  0
    5.3611   -1.5078    2.3446 F   0  0  0  0  0  0  0  0  0  0  0  0
   -4.8681    0.7521    1.6577 C   0  0  0  0  0  0  0  0  0  0  0  0
   -4.9065   -0.6261    1.8953 F   0  0  0  0  0  0  0  0  0  0  0  0
   -5.7156    1.4045    2.5595 F   0  0  0  0  0  0  0  0  0  0  0  0
   -5.2904    1.0117    0.3495 F   0  0  0  0  0  0  0  0  0  0  0  0
    0.5872    5.1164    1.5800 N   0  0  0  0  0  0  0  0  0  0  0  0
   -1.7580    5.4342    2.9848 C   0  0  0  0  0  0  0  0  0  0  0  0
   -2.2259    4.3350    3.6804 C   0  0  0  0  0  0  0  0  0  0  0  0
   -3.5800    4.0579    3.7052 C   0  0  0  0  0  0  0  0  0  0  0  0
   -4.4661    4.8802    3.0348 C   0  0  0  0  0  0  0  0  0  0  0  0
   -3.9983    5.9799    2.3400 C   0  0  0  0  0  0  0  0  0  0  0  0
   -2.6441    6.2562    2.3140 C   0  0  0  0  0  0  0  0  0  0  0  0
   -5.9422    4.5776    3.0611 C   0  0  0  0  0  0  0  0  0  0  0  0
   -0.0328    5.7915    2.9592 S   0  0  0  0  0  0  0  0  0  0  0  0
    0.5406    5.0797    4.0472 O   0  0  0  0  0  0  0  0  0  0  0  0
    0.0832    7.1992    2.8040 O   0  0  0  0  0  0  0  0  0  0  0  0
    2.5087    1.9643    4.2587 O   0  0  0  0  0  0  0  0  0  0  0  0
    3.5773    1.6675    5.1598 C   0  0  0  0  0  0  0  0  0  0  0  0
    8.9961    2.7982   -1.4138 C   0  0  0  0  0  0  0  0  0  0  0  0
    9.1211    4.1338   -1.8110 F   0  0  0  0  0  0  0  0  0  0  0  0
    9.9889    2.4959   -0.4756 F   0  0  0  0  0  0  0  0  0  0  0  0
    9.1387    1.9649   -2.5285 F   0  0  0  0  0  0  0  0  0  0  0  0
    5.6865   -0.0925    0.7104 O   0  0  0  0  0  0  0  0  0  0  0  0
    6.6517   -1.1372    0.5730 C   0  0  0  0  0  0  0  0  0  0  0  0
  1  2  2  0      
  2  3  1  0      
  3  4  2  0      
  4  5  1  0      
  1  5  1  0      
  5  6  1  0      
  6  7  1  0      
  7  8  2  0      
  9  6  2  0      
  1 10  1  0      
 10 11  1  0      
 11 12  2  0      
 12 13  1  0      
 13 14  2  0      
 14 15  1  0      
 15 16  2  0      
 16 11  1  0      
  9 17  1  0      
 17 18  1  0      
 18 19  1  0      
 18 20  2  0      
 20 21  1  0      
 21 22  2  0      
 22 23  1  0      
 23 19  2  0      
 24 25  2  0      
 25 26  1  0      
 26 27  2  0      
 27 28  1  0      
 28 29  2  0      
 29 24  1  0      
 17 26  1  0      
 17 30  1  0      
 10 31  1  0      
 32 33  1  0      
 20 32  1  0      
 34 35  1  0      
 34 36  1  0      
 34 37  1  0      
 29 34  1  0      
 38 39  1  0      
 38 40  1  0      
 38 41  1  0      
 22 38  1  0      
 42 50  1  0      
 43 44  2  0      
 44 45  1  0      
 45 46  2  0      
 46 47  1  0      
 47 48  2  0      
 43 48  1  0      
 46 49  1  0      
 43 50  1  0      
 50 51  2  0      
 50 52  2  0      
  8 42  1  0      
  9 42  1  0      
 27 53  1  0      
 53 54  1  0      
 55 56  1  0      
 55 57  1  0      
 55 58  1  0      
 14 55  1  0      
 59 60  1  0      
 16 59  1  0      
M  STY  1   1 SUP
M  SLB  1   1   1
M  SAL   1  2  32  33
M  SBL   1  1  36
M  SMT   1 OMe
M  SBV   1 36   -7.8920    6.1426
M  STY  1   2 SUP
M  SLB  1   2   2
M  SAL   2  4  34  35  36  37
M  SBL   2  1  40
M  SMT   2 CF3
M  SBV   2 40   -7.5996    6.6477
M  STY  1   3 SUP
M  SLB  1   3   3
M  SAL   3  4  38  39  40  41
M  SBL   3  1  44
M  SMT   3 CF3
M  SBV   3 44   -8.1009    5.4388
M  STY  1   4 SUP
M  SLB  1   4   4
M  SAL   4 11  42  43  44  45  46  47  48  49  50  51  52
M  SBL   4  2  56  57
M  SMT   4 NTs
M  SBV   4 56   -7.9833    5.7005
M  SBV   4 57   -7.0394    6.6444
M  STY  1   5 SUP
M  SLB  1   5   5
M  SAL   5  2  53  54
M  SBL   5  1  58
M  SMT   5 OMe
M  SBV   5 58   -6.6159    6.0574
M  STY  1   6 SUP
M  SLB  1   6   6
M  SAL   6  4  55  56  57  58
M  SBL   6  1  63
M  SMT   6 CF3
M  SBV   6 63   -6.6723    5.4389
M  STY  1   7 SUP
M  SLB  1   7   7
M  SAL   7  2  59  60
M  SBL   7  1  65
M  SMT   7 OMe
M  SBV   7 65   -7.0292    6.4702
M  END
$$$$
