# Supplementary material for: Marinopyrrole Derivatives as Potential Antibiotic Agents against Methicillin-Resistant Staphylococcus aureus (II)
Source: MDPI journal article supplement (doi:10.3390/md11082927), 2013-08-15
Supplement: s5 [file s5]

marinedrugs-11-02927-s002.mol
  ChemDraw04141415362D

 60 65  0  0  0  0  0  0  0  0999 V2000
    0.6620   -1.7543    0.0000 C   0  0  0  0  0  0  0  0  0  0  0  0
    0.4485   -2.5511    0.0000 C   0  0  0  0  0  0  0  0  0  0  0  0
   -0.3765   -2.5511    0.0000 C   0  0  0  0  0  0  0  0  0  0  0  0
   -0.5900   -1.7543    0.0000 C   0  0  0  0  0  0  0  0  0  0  0  0
    0.0417   -1.3536    0.0000 N   0  0  0  0  0  0  0  0  0  0  0  0
    0.0417   -0.5286    0.0000 C   0  0  0  0  0  0  0  0  0  0  0  0
    0.6250    0.0548    0.0000 C   0  0  0  0  0  0  0  0  0  0  0  0
    0.2505    0.7899    0.0000 C   0  0  0  0  0  0  0  0  0  0  0  0
   -0.6934   -0.1540    0.0000 C   0  0  0  0  0  0  0  0  0  0  0  0
    1.3765   -1.3418    0.0000 C   0  0  0  0  0  0  0  0  0  0  0  0
    2.0910   -1.7543    0.0000 C   0  0  0  0  0  0  0  0  0  0  0  0
    2.0910   -2.5793    0.0000 C   0  0  0  0  0  0  0  0  0  0  0  0
    2.8054   -2.9918    0.0000 C   0  0  0  0  0  0  0  0  0  0  0  0
    3.5199   -2.5793    0.0000 C   0  0  0  0  0  0  0  0  0  0  0  0
    3.5199   -1.7543    0.0000 C   0  0  0  0  0  0  0  0  0  0  0  0
    2.8054   -1.3418    0.0000 C   0  0  0  0  0  0  0  0  0  0  0  0
   -1.5184   -0.1540    0.0000 C   0  0  0  0  0  0  0  0  0  0  0  0
   -2.1018   -0.7374    0.0000 C   0  0  0  0  0  0  0  0  0  0  0  0
   -1.8883   -1.5343    0.0000 C   0  0  0  0  0  0  0  0  0  0  0  0
   -2.8987   -0.5239    0.0000 C   0  0  0  0  0  0  0  0  0  0  0  0
   -3.4820   -1.1072    0.0000 C   0  0  0  0  0  0  0  0  0  0  0  0
   -3.2685   -1.9041    0.0000 C   0  0  0  0  0  0  0  0  0  0  0  0
   -2.4716   -2.1176    0.0000 C   0  0  0  0  0  0  0  0  0  0  0  0
   -2.8897    2.0723    0.0000 C   0  0  0  0  0  0  0  0  0  0  0  0
   -2.7409    1.2609    0.0000 C   0  0  0  0  0  0  0  0  0  0  0  0
   -1.9637    0.9840    0.0000 C   0  0  0  0  0  0  0  0  0  0  0  0
   -1.3354    1.5186    0.0000 C   0  0  0  0  0  0  0  0  0  0  0  0
   -1.4842    2.3301    0.0000 C   0  0  0  0  0  0  0  0  0  0  0  0
   -2.2614    2.6070    0.0000 C   0  0  0  0  0  0  0  0  0  0  0  0
   -1.5184   -0.9790    0.0000 O   0  0  0  0  0  0  0  0  0  0  0  0
    1.3765   -0.5168    0.0000 O   0  0  0  0  0  0  0  0  0  0  0  0
   -3.4052   -0.2318    0.0000 O   0  0  0  0  0  0  0  0  0  0  0  0
   -3.8865    0.2494    0.0000 C   0  0  0  0  0  0  0  0  0  0  0  0
   -2.4755    3.4042    0.0000 C   0  0  0  0  0  0  0  0  0  0  0  0
   -1.8182    3.5804    0.0000 F   0  0  0  0  0  0  0  0  0  0  0  0
   -2.2994    2.7467    0.0000 F   0  0  0  0  0  0  0  0  0  0  0  0
   -3.1330    3.2280    0.0000 F   0  0  0  0  0  0  0  0  0  0  0  0
   -3.9839   -2.3158    0.0000 C   0  0  0  0  0  0  0  0  0  0  0  0
   -3.6436   -2.9052    0.0000 F   0  0  0  0  0  0  0  0  0  0  0  0
   -4.5734   -2.6561    0.0000 F   0  0  0  0  0  0  0  0  0  0  0  0
   -4.3242   -1.7264    0.0000 F   0  0  0  0  0  0  0  0  0  0  0  0
   -0.3473    0.6399    0.0000 N   0  0  0  0  0  0  0  0  0  0  0  0
   -1.1809    1.1211    0.0000 C   0  0  0  0  0  0  0  0  0  0  0  0
   -1.6622    1.6024    0.0000 C   0  0  0  0  0  0  0  0  0  0  0  0
   -2.3197    1.4263    0.0000 C   0  0  0  0  0  0  0  0  0  0  0  0
   -2.4958    0.7688    0.0000 C   0  0  0  0  0  0  0  0  0  0  0  0
   -2.0146    0.2875    0.0000 C   0  0  0  0  0  0  0  0  0  0  0  0
   -1.3571    0.4637    0.0000 C   0  0  0  0  0  0  0  0  0  0  0  0
   -3.1532    0.5927    0.0000 C   0  0  0  0  0  0  0  0  0  0  0  0
   -0.5235    1.2973    0.0000 S   0  0  0  0  0  0  0  0  0  0  0  0
   -0.6997    1.9547    0.0000 O   0  0  0  0  0  0  0  0  0  0  0  0
    0.1339    1.4735    0.0000 O   0  0  0  0  0  0  0  0  0  0  0  0
   -0.5658    1.7255    0.0000 O   0  0  0  0  0  0  0  0  0  0  0  0
    0.1487    1.3130    0.0000 C   0  0  0  0  0  0  0  0  0  0  0  0
    4.2331   -2.9909    0.0000 C   0  0  0  0  0  0  0  0  0  0  0  0
    3.8928   -3.5804    0.0000 F   0  0  0  0  0  0  0  0  0  0  0  0
    3.6436   -2.6506    0.0000 F   0  0  0  0  0  0  0  0  0  0  0  0
    4.5734   -2.4015    0.0000 F   0  0  0  0  0  0  0  0  0  0  0  0
    3.1617   -0.7221    0.0000 O   0  0  0  0  0  0  0  0  0  0  0  0
    3.7511   -1.0624    0.0000 C   0  0  0  0  0  0  0  0  0  0  0  0
  1  2  2  0      
  2  3  1  0      
  3  4  2  0      
  4  5  1  0      
  1  5  1  0      
  5  6  1  0      
  6  7  1  0      
  7  8  2  0      
  9  6  2  0      
  1 10  1  0      
 10 11  1  0      
 11 12  2  0      
 12 13  1  0      
 13 14  2  0      
 14 15  1  0      
 15 16  2  0      
 16 11  1  0      
  9 17  1  0      
 17 18  1  0      
 18 19  1  0      
 18 20  2  0      
 20 21  1  0      
 21 22  2  0      
 22 23  1  0      
 23 19  2  0      
 24 25  2  0      
 25 26  1  0      
 26 27  2  0      
 27 28  1  0      
 28 29  2  0      
 29 24  1  0      
 17 26  1  0      
 17 30  1  0      
 10 31  1  0      
 32 33  1  0      
 20 32  1  0      
 34 35  1  0      
 34 36  1  0      
 34 37  1  0      
 29 34  1  0      
 38 39  1  0      
 38 40  1  0      
 38 41  1  0      
 22 38  1  0      
 42 50  1  0      
 43 44  2  0      
 44 45  1  0      
 45 46  2  0      
 46 47  1  0      
 47 48  2  0      
 43 48  1  0      
 46 49  1  0      
 43 50  1  0      
 50 51  2  0      
 50 52  2  0      
  8 42  1  0      
  9 42  1  0      
 27 53  1  0      
 53 54  1  0      
 55 56  1  0      
 55 57  1  0      
 55 58  1  0      
 14 55  1  0      
 59 60  1  0      
 16 59  1  0      
M  STY  1   1 SUP
M  SLB  1   1   1
M  SAL   1  2  32  33
M  SBL   1  1  36
M  SMT   1 OMe
M  SBV   1 36   -7.8920    6.1426
M  STY  1   2 SUP
M  SLB  1   2   2
M  SAL   2  4  34  35  36  37
M  SBL   2  1  40
M  SMT   2 CF3
M  SBV   2 40   -7.5996    6.6477
M  STY  1   3 SUP
M  SLB  1   3   3
M  SAL   3  4  38  39  40  41
M  SBL   3  1  44
M  SMT   3 CF3
M  SBV   3 44   -8.1009    5.4388
M  STY  1   4 SUP
M  SLB  1   4   4
M  SAL   4 11  42  43  44  45  46  47  48  49  50  51  52
M  SBL   4  2  56  57
M  SMT   4 NTs
M  SBV   4 56   -7.9833    5.7005
M  SBV   4 57   -7.0394    6.6444
M  STY  1   5 SUP
M  SLB  1   5   5
M  SAL   5  2  53  54
M  SBL   5  1  58
M  SMT   5 OMe
M  SBV   5 58   -6.6159    6.0574
M  STY  1   6 SUP
M  SLB  1   6   6
M  SAL   6  4  55  56  57  58
M  SBL   6  1  63
M  SMT   6 CF3
M  SBV   6 63   -6.6723    5.4389
M  STY  1   7 SUP
M  SLB  1   7   7
M  SAL   7  2  59  60
M  SBL   7  1  65
M  SMT   7 OMe
M  SBV   7 65   -7.0292    6.4702
M  END
