# Supplementary material for: Marinopyrrole Derivatives as Potential Antibiotic Agents against Methicillin-Resistant Staphylococcus aureus (II)
Source: MDPI journal article supplement (doi:10.3390/md11082927), 2013-08-15
Supplement: s6 [file s6]

marinedrugs-11-02927-s003.mol
  corina  04141403413D 1   1.00000     0.00000 
CORINA 3.49 0023  12.04.2013
 34 37  0  0  0  0  0  0  0  0999 V2000
   -0.0169    1.3916    0.0097 C   0  0  0  0  0  0  0  0  0  0  0  0
    0.0021   -0.0041    0.0020 C   0  0  0  0  0  0  0  0  0  0  0  0
    1.2696    1.8295   -0.0002 C   0  0  0  0  0  0  0  0  0  0  0  0
    1.3313   -0.3944   -0.0128 C   0  0  0  0  0  0  0  0  0  0  0  0
    2.1003    0.7547   -0.0139 N   0  0  0  0  0  0  0  0  0  0  0  0
    3.4946    0.8023   -0.0274 C   0  0  0  0  0  0  0  0  0  0  0  0
    4.3350    0.8244    1.0839 C   0  0  0  0  0  0  0  0  0  0  0  0
    4.3182    0.8310   -1.1617 C   0  0  0  0  0  0  0  0  0  0  0  0
    5.6076    0.8740   -0.7431 C   0  0  0  0  0  0  0  0  0  0  0  0
    5.6364    0.8707    0.6136 N   0  0  0  0  0  0  0  0  0  0  0  0
    3.9361    0.8036    2.4311 C   0  0  0  0  0  0  0  0  0  0  0  0
    1.7700    3.4919    0.0030 Cl  0  0  0  0  0  0  0  0  0  0  0  0
   -1.4352    2.3926    0.0222 Cl  0  0  0  0  0  0  0  0  0  0  0  0
    1.8119   -1.7208   -0.0245 C   0  0  0  0  0  0  0  0  0  0  0  0
    3.0078   -1.9333   -0.0366 O   0  0  0  0  0  0  0  0  0  0  0  0
    3.7817    0.8134   -2.8126 Cl  0  0  0  0  0  0  0  0  0  0  0  0
    7.0002    0.9208   -1.7785 Cl  0  0  0  0  0  0  0  0  0  0  0  0
    4.9727    0.8324    3.5245 C   0  0  0  0  0  0  0  0  0  0  0  0
    2.7548    0.7623    2.7145 O   0  0  0  0  0  0  0  0  0  0  0  0
    0.8416   -2.8739   -0.0220 C   0  0  0  0  0  0  0  0  0  0  0  0
    4.2881    0.8019    4.8667 C   0  0  0  0  0  0  0  0  0  0  0  0
    4.0269    1.9814    5.5363 C   0  0  0  0  0  0  0  0  0  0  0  0
    3.3988    1.9542    6.7680 C   0  0  0  0  0  0  0  0  0  0  0  0
    3.0307    0.7470    7.3322 C   0  0  0  0  0  0  0  0  0  0  0  0
    3.2902   -0.4356    6.6667 C   0  0  0  0  0  0  0  0  0  0  0  0
    3.9146   -0.4106    5.4283 C   0  0  0  0  0  0  0  0  0  0  0  0
    4.1709   -1.5725    4.7717 O   0  0  0  0  0  0  0  0  0  0  0  0
    1.6053   -4.1730   -0.0361 C   0  0  0  0  0  0  0  0  0  0  0  0
    1.8548   -4.8151   -1.2333 C   0  0  0  0  0  0  0  0  0  0  0  0
    2.5604   -6.0043   -1.2475 C   0  0  0  0  0  0  0  0  0  0  0  0
    3.0177   -6.5536   -0.0642 C   0  0  0  0  0  0  0  0  0  0  0  0
    2.7704   -5.9154    1.1361 C   0  0  0  0  0  0  0  0  0  0  0  0
    2.0632   -4.7222    1.1529 C   0  0  0  0  0  0  0  0  0  0  0  0
    1.8190   -4.0923    2.3322 O   0  0  0  0  0  0  0  0  0  0  0  0
  1  2  1  0      
  1  3  2  0      
  2  4  2  0      
  3  5  1  0      
  4  5  1  0      
  5  6  1  0      
  6  7  2  0      
  6  8  1  0      
  8  9  2  0      
  9 10  1  0      
 10  7  1  0      
  7 11  1  0      
  3 12  1  0      
  1 13  1  0      
  4 14  1  0      
 14 15  2  0      
  8 16  1  0      
  9 17  1  0      
 11 18  1  0      
 11 19  2  0      
 14 20  1  0      
 18 21  1  0      
 21 22  2  0      
 22 23  1  0      
 23 24  2  0      
 24 25  1  0      
 25 26  2  0      
 26 21  1  0      
 26 27  1  0      
 28 29  2  0      
 29 30  1  0      
 30 31  2  0      
 31 32  1  0      
 32 33  2  0      
 33 28  1  0      
 20 28  1  0      
 33 34  1  0      
M  END
$$$$
