# Supplementary material for: Marinopyrrole Derivatives as Potential Antibiotic Agents against Methicillin-Resistant Staphylococcus aureus (II)
Source: MDPI journal article supplement (doi:10.3390/md11082927), 2013-08-15
Supplement: s7 [file s7]

marinedrugs-11-02927-s003.mol
  ChemDraw04141415392D

 34 37  0  0  0  0  0  0  0  0999 V2000
   -0.4366   -1.6146    0.0000 C   0  0  0  0  0  0  0  0  0  0  0  0
    0.3884   -1.6146    0.0000 C   0  0  0  0  0  0  0  0  0  0  0  0
   -0.6501   -0.8177    0.0000 C   0  0  0  0  0  0  0  0  0  0  0  0
    0.6019   -0.8177    0.0000 C   0  0  0  0  0  0  0  0  0  0  0  0
   -0.0112   -0.5160    0.0000 N   0  0  0  0  0  0  0  0  0  0  0  0
   -0.0112    0.3089    0.0000 C   0  0  0  0  0  0  0  0  0  0  0  0
   -0.7257    0.7214    0.0000 C   0  0  0  0  0  0  0  0  0  0  0  0
    0.6019    0.8609    0.0000 C   0  0  0  0  0  0  0  0  0  0  0  0
    0.2663    1.6146    0.0000 C   0  0  0  0  0  0  0  0  0  0  0  0
   -0.5542    1.5284    0.0000 N   0  0  0  0  0  0  0  0  0  0  0  0
   -1.4402    0.3089    0.0000 C   0  0  0  0  0  0  0  0  0  0  0  0
   -1.4751   -0.8177    0.0000 Cl  0  0  0  0  0  0  0  0  0  0  0  0
   -1.0200   -2.1980    0.0000 Cl  0  0  0  0  0  0  0  0  0  0  0  0
    1.3164   -0.4052    0.0000 C   0  0  0  0  0  0  0  0  0  0  0  0
    1.5299    0.3916    0.0000 O   0  0  0  0  0  0  0  0  0  0  0  0
    1.4269    0.8609    0.0000 Cl  0  0  0  0  0  0  0  0  0  0  0  0
    0.8497    2.1980    0.0000 Cl  0  0  0  0  0  0  0  0  0  0  0  0
   -2.1546    0.7214    0.0000 C   0  0  0  0  0  0  0  0  0  0  0  0
   -1.8527   -0.4055    0.0000 O   0  0  0  0  0  0  0  0  0  0  0  0
    2.0308   -0.8177    0.0000 C   0  0  0  0  0  0  0  0  0  0  0  0
   -2.7939    0.3296    0.0000 C   0  0  0  0  0  0  0  0  0  0  0  0
   -3.2064    1.0441    0.0000 C   0  0  0  0  0  0  0  0  0  0  0  0
   -4.0314    1.0441    0.0000 C   0  0  0  0  0  0  0  0  0  0  0  0
   -4.4439    0.3296    0.0000 C   0  0  0  0  0  0  0  0  0  0  0  0
   -4.0314   -0.3849    0.0000 C   0  0  0  0  0  0  0  0  0  0  0  0
   -3.2064   -0.3849    0.0000 C   0  0  0  0  0  0  0  0  0  0  0  0
   -2.9929   -1.1818    0.0000 O   0  0  0  0  0  0  0  0  0  0  0  0
    2.7939   -0.4053    0.0000 C   0  0  0  0  0  0  0  0  0  0  0  0
    3.2064    0.3092    0.0000 C   0  0  0  0  0  0  0  0  0  0  0  0
    4.0314    0.3092    0.0000 C   0  0  0  0  0  0  0  0  0  0  0  0
    4.4439   -0.4053    0.0000 C   0  0  0  0  0  0  0  0  0  0  0  0
    4.0314   -1.1197    0.0000 C   0  0  0  0  0  0  0  0  0  0  0  0
    3.2064   -1.1197    0.0000 C   0  0  0  0  0  0  0  0  0  0  0  0
    2.7939   -1.8342    0.0000 O   0  0  0  0  0  0  0  0  0  0  0  0
  1  2  1  0      
  1  3  2  0      
  2  4  2  0      
  3  5  1  0      
  4  5  1  0      
  5  6  1  0      
  6  7  2  0      
  6  8  1  0      
  8  9  2  0      
  9 10  1  0      
 10  7  1  0      
  7 11  1  0      
  3 12  1  0      
  1 13  1  0      
  4 14  1  0      
 14 15  2  0      
  8 16  1  0      
  9 17  1  0      
 11 18  1  0      
 11 19  2  0      
 14 20  1  0      
 18 21  1  0      
 21 22  2  0      
 22 23  1  0      
 23 24  2  0      
 24 25  1  0      
 25 26  2  0      
 26 21  1  0      
 26 27  1  0      
 28 29  2  0      
 29 30  1  0      
 30 31  2  0      
 31 32  1  0      
 32 33  2  0      
 33 28  1  0      
 20 28  1  0      
 33 34  1  0      
M  END
