# Supplementary material for: Marinopyrrole Derivatives as Potential Antibiotic Agents against Methicillin-Resistant Staphylococcus aureus (II)
Source: MDPI journal article supplement (doi:10.3390/md11082927), 2013-08-15
Supplement: s8 [file s8]

marinedrugs-11-02927-s004.mol
  corina  04141403413D 1   1.00000     0.00000 
CORINA 3.49 0023  12.04.2013
 28 31  0  0  0  0  0  0  0  0999 V2000
   -0.0259    1.6129    0.2273 C   0  0  0  0  0  0  0  0  0  0  0  0
    0.8341    1.6485   -0.8728 C   0  0  0  0  0  0  0  0  0  0  0  0
    2.0687    1.0403   -0.7998 C   0  0  0  0  0  0  0  0  0  0  0  0
    2.4615    0.3931    0.3601 C   0  0  0  0  0  0  0  0  0  0  0  0
    1.6210    0.3503    1.4553 C   0  0  0  0  0  0  0  0  0  0  0  0
    0.3755    0.9567    1.3996 C   0  0  0  0  0  0  0  0  0  0  0  0
   -1.3472    2.2674    0.1582 C   0  0  0  0  0  0  0  0  0  0  0  0
   -2.5580    1.4583   -0.0004 C   0  0  0  0  0  0  0  0  0  0  0  0
   -2.6256    0.0787    0.0087 C   0  0  0  0  0  0  0  0  0  0  0  0
   -3.9673   -0.2690   -0.1745 C   0  0  0  0  0  0  0  0  0  0  0  0
   -3.8397    1.9348   -0.1801 N   0  0  0  0  0  0  0  0  0  0  0  0
   -4.6832    0.8760   -0.2900 C   0  0  0  0  0  0  0  0  0  0  0  0
   -4.2079    3.2803   -0.2424 C   0  0  0  0  0  0  0  0  0  0  0  0
   -5.0217    3.9678    0.6718 C   0  0  0  0  0  0  0  0  0  0  0  0
   -5.1321    5.2488    0.2503 C   0  0  0  0  0  0  0  0  0  0  0  0
   -4.4214    5.4033   -0.8948 N   0  0  0  0  0  0  0  0  0  0  0  0
   -3.8340    4.1964   -1.2178 C   0  0  0  0  0  0  0  0  0  0  0  0
   -3.0091    3.9375   -2.3415 C   0  0  0  0  0  0  0  0  0  0  0  0
   -2.6096    5.0436   -3.2347 C   0  0  0  0  0  0  0  0  0  0  0  0
   -3.5302    5.5830   -4.1438 C   0  0  0  0  0  0  0  0  0  0  0  0
   -1.3143    5.5620   -3.1744 C   0  0  0  0  0  0  0  0  0  0  0  0
   -0.9477    6.5947   -4.0105 C   0  0  0  0  0  0  0  0  0  0  0  0
   -1.8588    7.1218   -4.9107 C   0  0  0  0  0  0  0  0  0  0  0  0
   -3.1446    6.6215   -4.9773 C   0  0  0  0  0  0  0  0  0  0  0  0
   -2.6298    2.8026   -2.5702 O   0  0  0  0  0  0  0  0  0  0  0  0
   -1.4307    3.4799    0.2330 O   0  0  0  0  0  0  0  0  0  0  0  0
   -0.4512    0.9154    2.4746 O   0  0  0  0  0  0  0  0  0  0  0  0
   -4.7929    5.0906   -4.2081 O   0  0  0  0  0  0  0  0  0  0  0  0
  1  2  2  0      
  2  3  1  0      
  3  4  2  0      
  4  5  1  0      
  5  6  2  0      
  6  1  1  0      
  1  7  1  0      
  7  8  1  0      
  8  9  2  0      
  9 10  1  0      
  8 11  1  0      
 11 12  1  0      
 12 10  2  0      
 11 13  1  0      
 13 14  1  0      
 14 15  2  0      
 15 16  1  0      
 16 17  1  0      
 17 13  2  0      
 17 18  1  0      
 18 19  1  0      
 19 20  1  0      
 19 21  2  0      
 21 22  1  0      
 22 23  2  0      
 23 24  1  0      
 24 20  2  0      
 18 25  2  0      
  7 26  2  0      
  6 27  1  0      
 20 28  1  0      
M  END
$$$$
