# Supplementary material for: Marinopyrrole Derivatives as Potential Antibiotic Agents against Methicillin-Resistant Staphylococcus aureus (II)
Source: MDPI journal article supplement (doi:10.3390/md11082927), 2013-08-15
Supplement: s9 [file s9]

marinedrugs-11-02927-s004.mol
  ChemDraw12271311572D

 28 31  0  0  0  0  0  0  0  0999 V2000
    2.0242   -1.1098    0.0000 C   0  0  0  0  0  0  0  0  0  0  0  0
    2.0242   -1.9348    0.0000 C   0  0  0  0  0  0  0  0  0  0  0  0
    2.7386   -2.3473    0.0000 C   0  0  0  0  0  0  0  0  0  0  0  0
    3.4531   -1.9348    0.0000 C   0  0  0  0  0  0  0  0  0  0  0  0
    3.4531   -1.1098    0.0000 C   0  0  0  0  0  0  0  0  0  0  0  0
    2.7386   -0.6973    0.0000 C   0  0  0  0  0  0  0  0  0  0  0  0
    1.4408   -0.5264    0.0000 C   0  0  0  0  0  0  0  0  0  0  0  0
    0.7263   -0.9389    0.0000 C   0  0  0  0  0  0  0  0  0  0  0  0
    0.5128   -1.7358    0.0000 C   0  0  0  0  0  0  0  0  0  0  0  0
   -0.3122   -1.7358    0.0000 C   0  0  0  0  0  0  0  0  0  0  0  0
    0.1003   -0.4662    0.0000 N   0  0  0  0  0  0  0  0  0  0  0  0
   -0.5671   -0.9512    0.0000 C   0  0  0  0  0  0  0  0  0  0  0  0
    0.1003    0.3588    0.0000 C   0  0  0  0  0  0  0  0  0  0  0  0
    0.8148    0.7713    0.0000 C   0  0  0  0  0  0  0  0  0  0  0  0
    0.6432    1.5782    0.0000 C   0  0  0  0  0  0  0  0  0  0  0  0
   -0.1772    1.6645    0.0000 N   0  0  0  0  0  0  0  0  0  0  0  0
   -0.5128    0.9108    0.0000 C   0  0  0  0  0  0  0  0  0  0  0  0
   -1.3097    0.6973    0.0000 C   0  0  0  0  0  0  0  0  0  0  0  0
   -2.0242    1.1098    0.0000 C   0  0  0  0  0  0  0  0  0  0  0  0
   -2.7386    0.6973    0.0000 C   0  0  0  0  0  0  0  0  0  0  0  0
   -2.0242    1.9348    0.0000 C   0  0  0  0  0  0  0  0  0  0  0  0
   -2.7386    2.3473    0.0000 C   0  0  0  0  0  0  0  0  0  0  0  0
   -3.4531    1.9348    0.0000 C   0  0  0  0  0  0  0  0  0  0  0  0
   -3.4531    1.1098    0.0000 C   0  0  0  0  0  0  0  0  0  0  0  0
   -1.5232   -0.0996    0.0000 O   0  0  0  0  0  0  0  0  0  0  0  0
    1.6543    0.2705    0.0000 O   0  0  0  0  0  0  0  0  0  0  0  0
    3.1511    0.0172    0.0000 O   0  0  0  0  0  0  0  0  0  0  0  0
   -2.9522   -0.0996    0.0000 O   0  0  0  0  0  0  0  0  0  0  0  0
  1  2  2  0      
  2  3  1  0      
  3  4  2  0      
  4  5  1  0      
  5  6  2  0      
  6  1  1  0      
  1  7  1  0      
  7  8  1  0      
  8  9  2  0      
  9 10  1  0      
  8 11  1  0      
 11 12  1  0      
 12 10  2  0      
 11 13  1  0      
 13 14  1  0      
 14 15  2  0      
 15 16  1  0      
 16 17  1  0      
 17 13  2  0      
 17 18  1  0      
 18 19  1  0      
 19 20  1  0      
 19 21  2  0      
 21 22  1  0      
 22 23  2  0      
 23 24  1  0      
 24 20  2  0      
 18 25  2  0      
  7 26  2  0      
  6 27  1  0      
 20 28  1  0      
M  END
